# Supplementary material for: Pot, atom and step economic synthesis: a diversity-oriented approach to construct 2-substituted pyrrolo[2,1-f][1,2,4]triazin-4(3H)-ones
Source: Royal Society of Chemistry journal article supplement (doi:10.1039/c3ra22909b), 2013-01-01
Supplement: c3ra22909b.pdf [file c3ra22909b.pdf]

# Pot, Atom and Step Economy Synthesis: A Diversity-Oriented Approach to Construct 2-substituted Pyrrolo[2,1-*f*][1,2,4]triazin-4(3*H*)-ones

Haoyue Xiang, Yanhong Chen, Qian He, Yuyuan Xie and Chunhao Yang\*

\*State Key Laboratory of Drug Research, Shanghai Institute of Materia Medica, Chinese Academy of Sciences, 555 Zuchongzhi Road, Shanghai, 201203, China. Fax: 86-21-50806770; Tel: 86-21-50806770; E-mail: [chyang@mail.shnc.ac.cn](mailto:chyang@mail.shnc.ac.cn).

## Supporting Information

### List of contents

|                                                      |         |
|------------------------------------------------------|---------|
| Experiment procedures.....                           | s2-s13  |
| Notes and references.....                            | s14     |
| X-ray crystallography of compound D17, D23, D30..... | s15-s17 |
| <sup>1</sup> H NMR, <sup>13</sup> C NMR.....         | s18-s60 |

## 1. Experimental procedures

### General information

Unless otherwise noted, all solvents and other reagents are commercially available and used without further purification.  $^1\text{H}$  and  $^{13}\text{C}$  NMR spectra were recorded on Varian Mercury-300/400 and Varian Mercury-400/500 spectrometers. MS and HRMS spectra were performed on a Finnigan MAT 95 spectrometer. Melting points were measured by Büchi 510 melting point apparatus without further corrected.

### Preparation of the starting material substituted 3-formyl-4-chromenones<sup>1</sup>

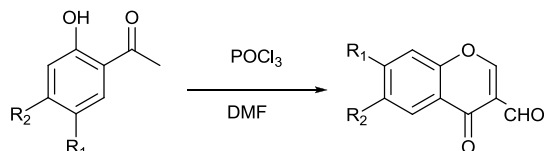

Dimethylformamide (6.0 mL) was cooled in ice-cold water and 2-hydroxy acetophenone (0.01 mmol) was added to this with vigorous stirring; phosphorus oxychloride (2.0 mL) was slowly added into the solution. The pink colour thick mass was kept overnight at room temperature. The mixture was then decomposed by cold water and extracted by EtOAc (3 × 100 mL). Concentrated under reduced pressure, the crude product was further purified by column chromatography (PE: EtOAc 10:1).

### 6-Methyl-4-oxo-4H-chromene-3-carbaldehyde (B2)

Yellow solid (64%). Mp 164-166 °C.  $^1\text{H}$  NMR (300 MHz,  $\text{CDCl}_3$ )  $\delta$  = 10.38 (s, 1H), 8.52 (s, 1H), 8.07 (s, 1H), 7.55 (d, 1H,  $J$  = 8.6 Hz), 7.42 (d, 1H,  $J$  = 8.6 Hz), 2.48 (s, 3H). IR (KBr) 3082, 2856, 1695, 1655, 1616, 1485, 949, 891, 825, 773, 545 486  $\text{cm}^{-1}$ .

### 6-Chloro-4-oxo-4H-chromene-3-carbaldehyde (B3)

Yellow solid (89%). Mp 94-96 °C.  $^1\text{H}$  NMR (300 MHz,  $\text{CDCl}_3$ )  $\delta$  = 10.36 (s, 1H), 8.54 (s, 1H), 8.25 (d, 1H,  $J$  = 2.6 Hz), 7.70 (dd, 1H,  $J$  = 8.9, 2.6 Hz), 7.51 (d, 1H,  $J$  = 8.9 Hz). IR (KBr) 3074, 2977, 2881, 1651, 1623, 1604, 1568, 1463, 1443, 1388, 1338, 1307, 1089, 1049, 997, 923, 842, 636, 543  $\text{cm}^{-1}$ .

### Preparation of the starting material compound A

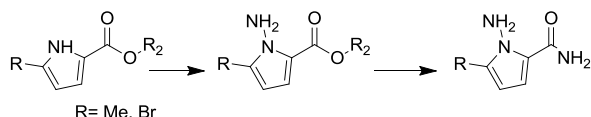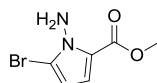

### Methyl 1-amino-5-bromo-1H-pyrrole-2-carboxylate

Preparation according to the literature (WO2007/150001 A1, 2007),  $\text{K}_2\text{CO}_3$  was used here to instead of NaOH. Yellow oil.  $^1\text{H}$  NMR (400 MHz,  $\text{CDCl}_3$ )  $\delta$  6.82 (d,  $J$  = 4.5 Hz, 1H), 6.11 (d,  $J$  = 4.5 Hz, 1H), 5.65 (s, 2H), 3.82 (s, 3H).  $^{13}\text{C}$  NMR (126 MHz,  $\text{CDCl}_3$ )  $\delta$  161.40, 120.73, 115.54, 111.26, 108.62, 51.36.

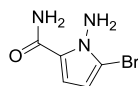

### 1-Amino-5-bromo-1H-pyrrole-2-carboxamide (A2)

Ammonolysis from methyl 1-amino-5-bromo-1H-pyrrole-2-carboxylate using  $\text{NH}_3$  in MeOH at 100 °C. Yellow solid. Mp 152-153 °C.  $^1\text{H}$  NMR (400 MHz,  $\text{DMSO}-d_6$ )  $\delta$  8.06 (br s, 1H), 7.26 (br s, 1H), 6.75 (d,  $J$  = 4.5 Hz, 1H), 6.57 (br s, 2H), 6.13 (d,  $J$  = 4.5 Hz, 1H).  $^{13}\text{C}$  NMR (101 MHz,  $\text{DMSO}-d_6$ )  $\delta$  162.51, 124.90, 111.69, 108.34, 107.59.  $m/z$  (EI): 205 [ $\text{M}^+$ ,  $\text{Br}^{81}$ , 46%], 447 [ $\text{M}^+$ ,  $\text{Br}^{79}$ , 49%], 188 ( $\text{Br}^{81}$ , 100%), 186 ( $\text{Br}^{79}$ , 98%), 79 (38%). calcd for  $\text{C}_5\text{H}_6\text{BrN}_3\text{O}$ , 202.9694; found; 202.9678 [ $\text{M}^+$ ,  $\text{Br}^{79}$ ].

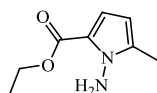

#### Ethyl 1-amino-5-methyl-1H-pyrrole-2-carboxylate

Preparation according to the literature.<sup>2</sup> Yellow oil. <sup>1</sup>H NMR (300 MHz, CDCl<sub>3</sub>) δ 6.77 (d, *J* = 4.2 Hz, 1H), 5.80 (dd, *J* = 4.2 Hz, 1H), 5.36 (s, 2H), 4.27 (q, *J* = 7.1 Hz, 2H), 1.34 (t, *J* = 7.1 Hz, 3H).

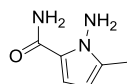

#### 1-Amino-5-methyl-1H-pyrrole-2-carboxamide (A3)

Ammonolysis according to the literature from ethyl 1-amino-5-methyl-1H-pyrrole-2-carboxylate.<sup>3</sup> Yellow solid. Mp 170-171 °C. <sup>1</sup>H NMR (400 MHz, DMSO-*d*6) δ 7.93 (br s, 1H), 6.97 (br s, 1H), 6.58 (d, *J* = 4.4 Hz, 1H), 6.38 (br s, 2H), 5.72 (d, *J* = 4.4 Hz, 1H), 2.15 (s, 3H). <sup>13</sup>C NMR (101 MHz, DMSO-*d*6) δ 163.61, 133.14, 122.45, 110.43, 103.77, 11.66. *m/z* (EI):139 [M<sup>+</sup>, 92%], 122 (100%), 94 (28%).calcd for C<sub>6</sub>H<sub>9</sub>N<sub>3</sub>O, 139.0746;found, 139.0746 [M<sup>+</sup>].

#### Typical procedure for synthesis of compound D1-40

A mixture of **A** (0.4mmol), **B** (0.4mmol), and CuCl<sub>2</sub>·H<sub>2</sub>O (0.4mmol) in DMSO (5mL) was kept in the pre-heated 120 °C oil bath for 2h under air atmosphere. After the starting materials converted to the intermediate **C** completely, NaOAc (4 equiv.) and amidines or hydrazines (0.4mmol) were added, and then kept the reaction for another 1h. After the reaction was complete, the reaction was cooled to room temperature, and then diluted by water (40 mL). The mixtures was extracted with EtOAc (3 x 30mL), washed with water and brine, dried over anhydrous Na<sub>2</sub>SO<sub>4</sub> and filtered. The solvent was removed under vacuum. The residue was applied on a silica-gel column (using CH<sub>2</sub>Cl<sub>2</sub>/MeOH=80/1) to afford yellow solid.

#### Characterization of the compounds

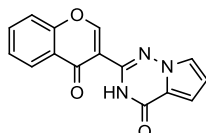

#### 2-(4-Oxo-4H-chromen-3-yl)pyrrolo[2,1-f][1,2,4]triazin-4(3H)-one (C1)

White solid. Mp 282-284 °C. <sup>1</sup>H NMR (300 MHz, DMSO-*d*6) δ 11.79 (s, 1H), 8.93 (s, 1H), 8.16 (d, *J* = 7.9 Hz, 1H), 7.90 (t, *J* = 7.6 Hz, 1H), 7.77 (d, *J* = 8.4 Hz, 1H), 7.65 (s, 0H), 7.59 (t, *J* = 7.7 Hz, 1H), 6.95 (d, *J* = 5.5 Hz, 1H), 6.59 (dd, *J* = 4.3, 2.6 Hz, 1H). <sup>13</sup>C NMR (126 MHz, DMSO-*d*6) δ 175.07, 158.58, 156.06, 154.39, 142.78, 135.64, 126.99, 125.81, 123.84, 122.00, 119.22, 119.06, 116.79, 111.04, 108.08. *m/z* (EI):279 [M<sup>+</sup>, 100%], 108 (60%), 80 (10%).calcd for C<sub>15</sub>H<sub>9</sub>N<sub>3</sub>O<sub>3</sub>, 279.0644;found, 279.0641 [M<sup>+</sup>].

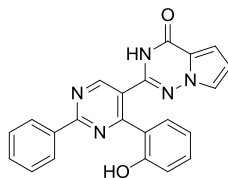

#### 2-(4-(2-Hydroxyphenyl)-2-phenylpyrimidin-5-yl)pyrrolo[2,1-f][1,2,4]triazin-4(3H)-one(D1)

Yellow solid (71%). Mp 212-214 °C. <sup>1</sup>H NMR (300 MHz, DMSO-*d*6) δ 11.90 (br 1H), 10.06 (br, 1H), 9.09 (s, 1H), 8.50-8.47 (m, 2H), 7.73 (dd, *J* = 7.7, 1.7 Hz, 1H), 7.63 – 7.51 (m, 3H), 7.45 – 7.37 (m, 1H), 7.28 (ddd, *J* = 8.2, 7.3, 1.8 Hz, 1H), 6.99 (td, *J* = 7.5, 1.1 Hz, 1H), 6.93 – 6.84 (m, 1H), 6.75 (dd, *J* = 8.2, 0.9 Hz, 1H), 6.56 – 6.43 (m, 1H). <sup>13</sup>C NMR (126 MHz, DMSO-*d*6) δ 164.05, 163.09, 158.62, 155.40, 155.30, 146.14, 136.99, 132.29, 132.00, 131.95, 129.37, 128.57, 124.53, 123.76, 121.74, 119.77, 118.99, 115.83, 110.80, 107.68. *m/z* (EI):381 [M<sup>+</sup>, 100%], 364 (62%), 109 (26%).calcd for C<sub>22</sub>H<sub>15</sub>N<sub>5</sub>O<sub>2</sub>, 381.1226;found, 381.1225 [M<sup>+</sup>].

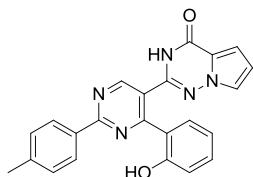

**2-(4-(2-Hydroxyphenyl)-2-(p-tolyl)pyrimidin-5-yl)pyrrolo[2,1-f][1,2,4]triazin-4(3H)-one (D2)**

Yellow solid (71%). Mp 258-260 °C. <sup>1</sup>H NMR (300 MHz, DMSO-*d*6) δ 11.91 (s, 1H), 10.03 (s, 1H), 9.06 (s, 1H), 8.39 (d, *J* = 8.1 Hz, 2H), 7.73 (dd, *J* = 7.6, 1.5 Hz, 1H), 7.46 – 7.34 (m, 3H), 7.29 (t, *J* = 7.6 Hz, 1H), 7.00 (t, *J* = 7.6 Hz, 1H), 6.90 (dd, *J* = 4.3, 1.6 Hz, 1H), 6.75 (d, *J* = 8.1 Hz, 1H), 6.51 (dd, *J* = 4.2, 2.8 Hz, 1H), 2.41 (s, 3H). <sup>13</sup>C NMR (101 MHz, DMSO-*d*6) δ 163.60, 162.52, 158.05, 154.91, 154.80, 145.69, 141.45, 133.86, 131.77, 131.45, 129.50, 128.09, 124.07, 122.97, 121.25, 119.26, 118.51, 115.34, 110.29, 107.17, 21.09. *m/z* (EI): 395 [M<sup>+</sup>, 100%], 378 (71%), 109 (26%). calcd for C<sub>23</sub>H<sub>17</sub>N<sub>5</sub>O<sub>2</sub>, 395.1382; found, 395.1381 [M<sup>+</sup>].

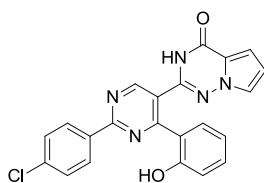

**2-(2-(4-Chlorophenyl)-4-(2-hydroxyphenyl)pyrimidin-5-yl)pyrrolo[2,1-f][1,2,4]triazin-4(3H)-one (D3)**

Yellow solid (69%). Mp 268-270 °C. <sup>1</sup>H NMR (300 MHz, DMSO-*d*6) δ 11.93 (s, 1H), 10.00 (s, 1H), 9.09 (s, 1H), 8.49 (d, *J* = 7.9 Hz, 2H), 7.73 (d, *J* = 7.7 Hz, 1H), 7.63 (d, *J* = 7.9 Hz, 2H), 7.43 – 7.37 (m, 1H), 7.28 (t, *J* = 7.8 Hz, 1H), 6.98 (t, *J* = 7.5 Hz, 1H), 6.89 (dd, *J* = 4.3, 1.6 Hz, 1H), 6.74 (d, *J* = 8.2 Hz, 1H), 6.49 (dd, *J* = 4.3, 2.7 Hz, 1H). <sup>13</sup>C NMR (126 MHz, DMSO-*d*6) δ 163.19, 163.07, 158.70, 155.37, 155.28, 146.04, 136.87, 135.85, 132.31, 132.06, 130.33, 129.49, 124.45, 123.96, 121.75, 119.77, 119.00, 115.81, 110.81, 107.68. *m/z* (EI): 417 [M<sup>+</sup>, Cl<sup>37</sup> 32%], 415 [M<sup>+</sup>, Cl<sup>35</sup> 100%], 398 (62%), 400 (18%), 109 (46%). calcd for C<sub>22</sub>H<sub>14</sub>ClN<sub>5</sub>O<sub>2</sub>, 415.0836; found, 415.0839 [M<sup>+</sup>].

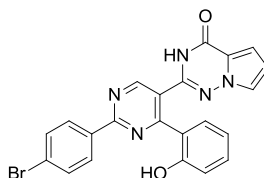

**2-(2-(4-Bromophenyl)-4-(2-hydroxyphenyl)pyrimidin-5-yl)pyrrolo[2,1-f][1,2,4]triazin-4(3H)-one (D4)**

Yellow solid (69%). Mp 279-281 °C. <sup>1</sup>H NMR (300 MHz, DMSO-*d*6) δ 11.95 (s, 1H), 10.02 (s, 1H), 9.11 (s, 1H), 8.43 (d, *J* = 8.5 Hz, 2H), 7.79 (d, *J* = 8.5 Hz, 2H), 7.74 (d, *J* = 6.8 Hz, 1H), 7.43-7.40 (m, 1H), 7.30 (t, *J* = 7.3 Hz, 1H), 7.00 (t, *J* = 7.6 Hz, 1H), 6.91 (d, *J* = 3.0 Hz, 1H), 6.75 (d, *J* = 8.2 Hz, 1H), 6.57 – 6.42 (m, 1H). <sup>13</sup>C NMR (126 MHz, DMSO-*d*6) δ 163.20, 158.70, 155.36, 155.28, 146.04, 136.20, 132.43, 132.31, 132.06, 130.54, 125.89, 124.44, 124.00, 121.75, 119.77, 119.00, 115.81, 110.81, 107.69. *m/z* (EI): 461 [M<sup>+</sup>, Br<sup>81</sup> 96%], 459 [M<sup>+</sup>, Br<sup>79</sup> 100%], 444 (51%), 442 (53%), 109 (61%). calcd for C<sub>22</sub>H<sub>14</sub>BrN<sub>5</sub>O<sub>2</sub>, 459.0331; found, 459.0331 [M<sup>+</sup>].

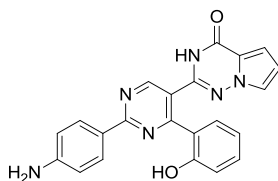

**2-(2-(4-Aminophenyl)-4-(2-hydroxyphenyl)pyrimidin-5-yl)pyrrolo[2,1-f][1,2,4]triazin-4(3H)-one (D5)**

Yellow solid (76%). Mp 265-266 °C. <sup>1</sup>H NMR (400 MHz, DMSO-*d*6) δ 11.83 (br s, 1H), 10.11 (br s, 1H), 8.90 (s, 1H), 8.19 (d, *J* = 8.3 Hz, 2H), 7.66 (d, *J* = 7.7 Hz, 1H), 7.42 (s, 1H), 7.26 (d, *J* = 7.6 Hz, 1H), 6.98 (d, *J* = 7.5 Hz, 1H), 6.92 – 6.72 (m, 2H), 6.67 (d, *J* = 7.6 Hz, 2H), 6.51 (s, 1H), 5.86 (br s, 2H). <sup>13</sup>C NMR (126 MHz, DMSO-*d*6) δ

164.55, 162.58, 158.20, 155.53, 155.28, 152.76, 146.45, 132.02, 131.69, 130.27, 124.60, 123.82, 121.63, 121.47, 119.60, 118.93, 115.87, 113.82, 110.67, 107.53.  $m/z$  (EI): 396 [ $M^+$ , 100%], 379 (82%), 109 (36%). calcd for  $C_{22}H_{16}N_6O_2$ , 396.1335; found, 396.1334 [ $M^+$ ].

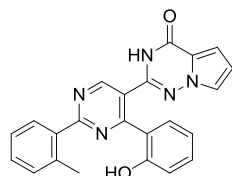

**2-(4-(2-Hydroxyphenyl)-2-(o-tolyl)pyrimidin-5-yl)pyrrolo[2,1-f][1,2,4]triazin-4(3H)-one (D6)**

Yellow solid (76%). Mp 270-272 °C.  $^1H$  NMR (300 MHz, DMSO-*d*<sub>6</sub>)  $\delta$  11.96 (br s, 1H), 10.07 (br s, 1H), 9.12 (s, 1H), 7.96 (dd,  $J = 8.0, 1.7$  Hz, 1H), 7.69 (dd,  $J = 7.8, 1.8$  Hz, 1H), 7.48 – 7.32 (m, 4H), 7.27 (ddd,  $J = 8.3, 7.3, 1.8$  Hz, 1H), 6.97 (td,  $J = 7.5, 1.0$  Hz, 1H), 6.91 (dd,  $J = 4.3, 1.6$  Hz, 1H), 6.76 (dd,  $J = 8.2, 1.0$  Hz, 1H), 6.52 (dd,  $J = 4.3, 2.7$  Hz, 1H), 2.61 (s, 3H).  $^{13}C$  NMR (126 MHz, DMSO-*d*<sub>6</sub>)  $\delta$  167.05 (s), 162.58 (s), 158.13 (s), 155.38 (s), 155.28 (s), 146.16 (s), 137.65 (s), 137.57 (s), 132.16 (s), 131.94 (s), 131.85 (s), 131.06 (s), 130.38 (s), 126.47 (s), 124.42 (s), 122.99 (s), 121.71 (s), 119.73 (s), 118.99 (s), 115.86 (s), 110.81 (s), 107.68 (s), 21.74 (s).  $m/z$  (EI): 395 [100%], 302 (12%), 286 (14%). calcd for  $C_{23}H_{17}N_5O_2$ , 395.1382; found, 395.1387 [ $M^+$ ].

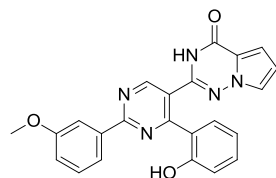

**2-(4-(2-Hydroxyphenyl)-2-(3-methoxyphenyl)pyrimidin-5-yl)pyrrolo[2,1-f][1,2,4]triazin-4(3H)-one (D7)**

Yellow solid (81%). Mp 210-212 °C.  $^1H$  NMR (300 MHz, DMSO-*d*<sub>6</sub>)  $\delta$  11.94 (s, 1H), 10.03 (s, 1H), 9.08 (s, 1H), 8.08 (d,  $J = 7.6$  Hz, 1H), 8.00 (s, 1H), 7.73 (d,  $J = 7.4$  Hz, 1H), 7.49 (t,  $J = 7.9$  Hz, 1H), 7.40 (s, 1H), 7.28 (t,  $J = 7.7$  Hz, 1H), 7.16 (d,  $J = 7.6$  Hz, 1H), 6.99 (t,  $J = 7.5$  Hz, 1H), 6.89 (d,  $J = 4.1$  Hz, 1H), 6.74 (d,  $J = 8.3$  Hz, 1H), 6.50 (t,  $J = 3.4$  Hz, 1H), 3.85 (s, 3H).  $^{13}C$  NMR (126 MHz, DMSO-*d*<sub>6</sub>)  $\delta$  163.78, 163.03, 160.13, 158.57, 155.40, 155.27, 146.10, 138.44, 132.26, 131.99, 130.51, 124.49, 123.84, 121.74, 120.99, 119.79, 118.99, 117.75, 115.82, 113.41, 110.79, 107.66, 55.72.  $m/z$  (EI): 411 [ $M^+$ , 100%], 394 (62%), 109 (28%). calcd for  $C_{23}H_{17}N_5O_3$ , 411.1331; found, 411.1337.

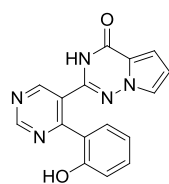

**2-(4-(2-Hydroxyphenyl)pyrimidin-5-yl)pyrrolo[2,1-f][1,2,4]triazin-4(3H)-one (D8)**

Yellow solid (71%). Mp 276-278 °C.  $^1H$  NMR (300 MHz, DMSO-*d*<sub>6</sub>)  $\delta$  11.93 (br s, 1H), 10.05 (br s, 1H), 9.34 (s, 1H), 9.00 (s, 1H), 7.58 (d,  $J = 7.5$  Hz, 1H), 7.39 (s, 1H), 7.25 (t,  $J = 7.4$  Hz, 1H), 6.92 (t,  $J = 7.5$  Hz, 1H), 6.89 (d,  $J = 3.3$  Hz, 1H), 6.72 (d,  $J = 8.2$  Hz, 1H), 6.49 (t,  $J = 3.0$  Hz, 1H).  $^{13}C$  NMR (126 MHz, DMSO-*d*<sub>6</sub>)  $\delta$  162.61, 159.37, 157.96, 155.35, 155.23, 145.94, 132.07, 132.01, 125.73, 124.03, 121.75, 119.66, 118.98, 115.86, 110.81, 107.68.  $m/z$  (EI): 305 [ $M^+$ , 100%], 287 (84%), 109 (62%), 108 (40%). calcd for  $C_{16}H_{11}N_5O_2$ , 305.0913; found, 305.0914 [ $M^+$ ].

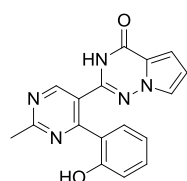

**2-(4-(2-Hydroxyphenyl)-2-methylpyrimidin-5-yl)pyrrolo[2,1-f][1,2,4]triazin-4(3H)-one (D9)**

Yellow solid (67%). Mp 236-238 °C. <sup>1</sup>H NMR (300 MHz, DMSO-*d*6) δ 11.84 (s, 1H), 10.04 (s, 1H), 8.87 (s, 1H), 7.54 (dd, *J* = 7.7, 1.7 Hz, 1H), 7.43 – 7.33 (m, 1H), 7.23 (td, *J* = 7.3, 1.8 Hz, 1H), 6.98 – 6.80 (m, 2H), 6.71 (d, *J* = 8.2 Hz, 1H), 6.49-6.47 (m, 1H), 2.72 (s, 3H). <sup>13</sup>C NMR (126 MHz, DMSO-*d*6) δ 168.53, 162.64, 158.06, 155.41, 155.26, 146.18, 132.02, 131.83, 124.07, 122.87, 121.70, 119.55, 118.93, 115.87, 110.74, 107.61, 26.23. *m/z* (EI):417 [M<sup>+</sup>, Cl<sup>37</sup> 32%], 319 (100%), 302 (62%), 109 (42%). calcd for C<sub>17</sub>H<sub>13</sub>N<sub>5</sub>O<sub>2</sub>, 319.1069; found, 319.1071 [M<sup>+</sup>].

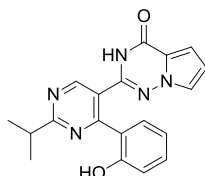

**2-(4-(2-Hydroxyphenyl)-2-isopropylpyrimidin-5-yl)pyrrolo[2,1-f][1,2,4]triazin-4(3H)-one (D10)**

Yellow solid (78%). Mp 190-192 °C. <sup>1</sup>H NMR (300 MHz, DMSO-*d*6) δ 11.85 (s, 1H), 10.12 (s, 1H), 8.92 (s, 1H), 7.57 (d, *J* = 7.6 Hz, 1H), 7.50 – 7.31 (m, 1H), 7.24 (t, *J* = 7.8 Hz, 1H), 6.92 (t, *J* = 7.5 Hz, 1H), 6.89 – 6.84 (m, 1H), 6.72 (d, *J* = 8.2 Hz, 1H), 6.52 – 6.44 (m, 1H), 3.26 - 3.19 (m, *J* = 14.2, 7.2 Hz, 1H), 1.34 (d, *J* = 6.9 Hz, 6H). <sup>13</sup>C NMR (126 MHz, DMSO-*d*6) δ 175.37, 162.53, 158.20, 155.52, 155.23, 146.22, 132.05, 131.87, 124.17, 123.01, 121.69, 119.64, 118.97, 115.91, 110.74, 107.62, 37.44, 22.03. *m/z* (EI):347 [M<sup>+</sup>, 100%], 330 (65%), 109 (34%). calcd for C<sub>19</sub>H<sub>17</sub>N<sub>5</sub>O<sub>2</sub>, 347.1382; found, 347.1380 [M<sup>+</sup>].

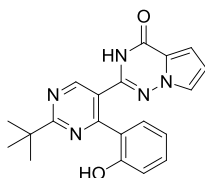

**2-(2-(tert-Butyl)-4-(2-hydroxyphenyl)pyrimidin-5-yl)pyrrolo[2,1-f][1,2,4]triazin-4(3H)-one (D11)**

Yellow solid (75%). Mp 136-138 °C. <sup>1</sup>H NMR (300 MHz, DMSO-*d*6) δ 11.84 (br s, 1H), 10.22 (br s, 1H), 8.95 (s, 1H), 7.59 (dd, *J* = 7.7, 1.7 Hz, 1H), 7.39 (dd, *J* = 2.4, 1.9 Hz, 1H), 7.31 – 7.20 (m, 1H), 6.94 (t, *J* = 7.5 Hz, 1H), 6.89 (dd, *J* = 4.3, 1.6 Hz, 1H), 6.74 (d, *J* = 8.2 Hz, 1H), 6.50 (dd, *J* = 4.3, 2.7 Hz, 1H), 1.43 (s, 9H). <sup>13</sup>C NMR (126 MHz, DMSO-*d*6) δ 177.16, 162.06, 158.00, 155.64, 155.25, 146.30, 132.03, 131.90, 124.22, 122.56, 121.68, 119.70, 118.98, 115.98, 110.73, 107.62, 29.85. *m/z* (EI):361 [M<sup>+</sup>, 100%], 344 (54%), 109 (18%). calcd for C<sub>20</sub>H<sub>19</sub>N<sub>5</sub>O<sub>2</sub>, 361.1539; found, 361.1532 [M<sup>+</sup>].

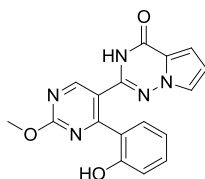

**2-(4-(2-Hydroxyphenyl)-2-methoxypyrimidin-5-yl)pyrrolo[2,1-f][1,2,4]triazin-4(3H)-one (D12)**

Yellow solid (75%). Mp 216-218 °C. <sup>1</sup>H NMR (300 MHz, DMSO-*d*6) δ 11.80 (s, 1H), 9.97 (s, 1H), 8.79 (s, 1H), 7.61 – 7.50 (m, 1H), 7.35 dd, *J* = 7.5, 1.5 Hz 1H), 7.23 (td, *J* = 7.7, 1.8 Hz, 1H), 6.92 (t, *J* = 7.5 Hz, 1H), 6.86 (dd, *J* = 4.2, 1.5 Hz, 1H), 6.71 (d, *J* = 8.1 Hz, 1H), 6.47 (dd, *J* = 4.2, 2.7 Hz, 1H), 4.01 (s, 3H). <sup>13</sup>C NMR (126 MHz, DMSO-*d*6) δ 165.55, 165.52, 160.81, 155.33, 146.04, 132.02, 131.98, 124.14, 121.60, 120.10, 119.58, 118.89, 115.84, 110.66, 107.52, 55.49. *m/z* (EI):335 [M<sup>+</sup>, 100%], 318 (57%), 109 (60%). calcd for C<sub>17</sub>H<sub>13</sub>N<sub>5</sub>O<sub>3</sub>, 335.1018; found, 335.1018 [M<sup>+</sup>].

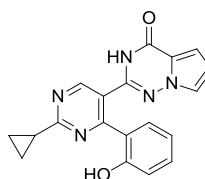

**2-(2-Cyclopropyl-4-(2-hydroxyphenyl)pyrimidin-5-yl)pyrrolo[2,1-f][1,2,4]triazin-4(3H)-one (D13)**

Yellow solid (78%). Mp 212-214 °C. <sup>1</sup>H NMR (300 MHz, DMSO-*d*<sub>6</sub>) δ 11.78 (s, 1H), 10.01 (s, 1H), 8.80 (s, 1H), 7.53 (dd, *J* = 7.5, 1.2, 1H), 7.38-7.36 (m, 1H), 7.22 (td, *J* = 7.5, 1.5 Hz, 1H), 6.91 (t, *J* = 7.5 Hz, 1H), 6.86 (dd, *J* = 3.9, 1.3 Hz, 1H), 6.70 (d, *J* = 8.2 Hz, 1H), 6.47 (dd, *J* = 4.2, 2.7 Hz, 1H), 2.36-2.6 (m, 1H), 1.17-1.12 (m, 4H). <sup>13</sup>C NMR (126 MHz, DMSO-*d*<sub>6</sub>) δ 172.30, 162.50, 157.93, 155.39, 155.26, 146.23, 131.99, 131.77, 124.26, 122.60, 121.67, 119.58, 118.91, 115.82, 110.72, 107.58, 18.59, 11.51. *m/z* (EI): 417 [M<sup>+</sup>, Cl<sup>37</sup> 32%], 345 [M<sup>+</sup>, 100%], 328 (64%), 109 (42%). calcd for C<sub>19</sub>H<sub>15</sub>N<sub>5</sub>O<sub>2</sub>, 345.1226; found, 345.1223 [M<sup>+</sup>].

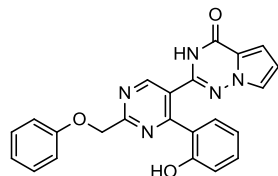

**2-(4-(2-Hydroxyphenyl)-2-(phenoxymethyl)pyrimidin-5-yl)pyrrolo[2,1-f][1,2,4]triazin-4(3H)-one (D14)**

Yellow solid (78%). Mp 206-208 °C. <sup>1</sup>H NMR (300 MHz, DMSO-*d*<sub>6</sub>) δ 11.92 (br s, 1H), 10.15 (br s, 1H), 9.02 (s, 1H), 7.52 (dd, *J* = 7.7, 1.7 Hz, 1H), 7.38 (dd, *J* = 2.7, 1.6 Hz, 1H), 7.34 – 7.19 (m, 3H), 7.08 – 6.82 (m, 5H), 6.72 (d, *J* = 8.1 Hz, 1H), 6.49 (dd, *J* = 4.3, 2.7 Hz, 1H), 5.39 (s, 2H). <sup>13</sup>C NMR (126 MHz, DMSO-*d*<sub>6</sub>) δ 166.53, 162.99, 158.62, 158.59, 155.54, 155.23, 145.90, 132.17, 132.08, 130.00, 124.18, 123.73, 121.75, 121.39, 119.65, 118.97, 115.96, 115.18, 110.82, 107.71, 70.40. *m/z* (EI): 411 [M<sup>+</sup>, 100%], 394 [46%], 318 (60%), 183 (20%). calcd for C<sub>23</sub>H<sub>17</sub>N<sub>5</sub>O<sub>3</sub>, 411.1331; found, 411.1343 [M<sup>+</sup>].

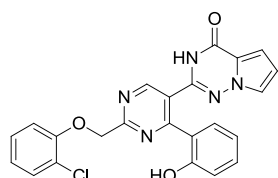

**2-(2-((2-Chlorophenoxy)methyl)-4-(2-hydroxyphenyl)pyrimidin-5-yl)pyrrolo[2,1-f][1,2,4]triazin-4(3H)-one (D15)**

Yellow solid (77%). Mp 95-96 °C. <sup>1</sup>H NMR (400 MHz, DMSO-*d*<sub>6</sub>) δ 11.97 (s, 1H), 10.14 (s, 1H), 9.03 (s, 1H), 7.52 (dd, *J* = 7.8, 1.7 Hz, 1H), 7.47 (dd, *J* = 7.8, 1.6 Hz, 1H), 7.40 (dd, *J* = 2.7, 1.6 Hz, 1H), 7.32 – 7.22 (m, 2H), 7.18 (dd, *J* = 8.3, 1.5 Hz, 1H), 6.98 (td, *J* = 7.6, 1.4 Hz, 1H), 6.95 – 6.87 (m, 2H), 6.73 (dd, *J* = 8.2, 1.1 Hz, 1H), 6.51 (dd, *J* = 4.3, 2.7 Hz, 1H), 5.54 (s, 2H). <sup>13</sup>C NMR (101 MHz, DMSO-*d*<sub>6</sub>) δ 165.64, 162.62, 158.33, 155.19, 154.90, 153.71, 145.58, 131.86, 131.78, 130.23, 128.32, 123.91, 123.39, 121.96, 121.50, 121.39, 119.30, 118.65, 115.61, 114.28, 110.46, 107.35, 70.61. *m/z* (EI): 412 [M<sup>+</sup>, Cl<sup>37</sup> 32%], 410 [M<sup>+</sup>, Cl<sup>35</sup> 100%], 392 (12%), 183 (16%). calcd for C<sub>23</sub>H<sub>16</sub>ClN<sub>5</sub>O<sub>3</sub>, 445.0942; found, 445.0948 [M<sup>+</sup>].

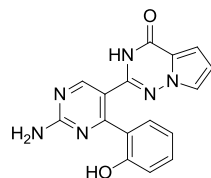

**2-(2-Amino-4-(2-hydroxyphenyl)pyrimidin-5-yl)pyrrolo[2,1-f][1,2,4]triazin-4(3H)-one (D16)**

Yellow solid (76%). Mp > 300 °C. <sup>1</sup>H NMR (300 MHz, DMSO-*d*<sub>6</sub>) δ 11.56 (s, 1H), 10.68 (s, 1H), 8.44 (s, 1H), 7.42 (t, *J* = 2.1 Hz, 1H), 7.34 (dd, *J* = 7.8, 1.7 Hz, 1H), 7.27 (s, 2H), 7.21 (td, *J* = 8.5, 8.0, 1.9 Hz, 1H), 6.84 (dd, *J* = 4.1, 1.8 Hz, 1H), 6.77 (t, *J* = 8.8 Hz, 1H), 6.51 – 6.42 (m, 1H). <sup>13</sup>C NMR (126 MHz, DMSO-*d*<sub>6</sub>) δ 163.89, 163.34, 160.12, 156.53, 155.26, 146.91, 131.69, 130.97, 122.98, 121.56, 119.14, 118.79, 116.61, 113.87, 110.54, 107.40. *m/z* (EI): 320 [M<sup>+</sup>, 100%], 302 (90%), 109 (84%), 108 (19%). calcd for C<sub>16</sub>H<sub>12</sub>N<sub>6</sub>O<sub>2</sub>, 320.1022; found, 320.1022 [M<sup>+</sup>].

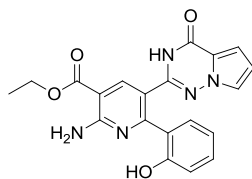

**Ethyl 2-amino-6-(2-hydroxyphenyl)-5-(4-oxo-3,4-dihydropyrrolo[2,1-f][1,2,4]triazin-2-yl)nicotinate (D17)**

Yellow solid (84%). Mp 280-282 °C. <sup>1</sup>H NMR (400 MHz, DMSO-*d*<sub>6</sub>) δ 11.60 (s, 1H), 10.66 (s, 1H), 8.32 (s, 1H), 7.72 (s, 2H), 7.44 (dd, *J* = 2.6, 1.7 Hz, 1H), 7.35 (dd, *J* = 7.7, 1.7 Hz, 1H), 7.20 (ddd, *J* = 8.0, 7.3, 1.7 Hz, 1H), 6.85 (dd, *J* = 4.3, 1.7 Hz, 1H), 6.83 – 6.75 (m, 2H), 6.50 (dd, *J* = 4.3, 2.6 Hz, 1H), 4.34 (q, *J* = 7.1 Hz, 2H), 1.33 (t, *J* = 7.1 Hz, 3H). <sup>13</sup>C NMR (126 MHz, DMSO-*d*<sub>6</sub>) δ 166.28, 159.84, 158.97, 156.34, 155.24, 147.75, 142.75, 131.30, 131.12, 123.97, 121.59, 119.07, 118.80, 116.61, 115.69, 110.57, 107.42, 103.11, 61.31, 14.68. *m/z* (EI): 391[100%], 373 (67%), 109 (67%). calcd for C<sub>20</sub>H<sub>17</sub>N<sub>5</sub>O<sub>4</sub>, 391.1281; found, 391.1280 [M<sup>+</sup>].

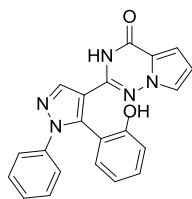

**2-(5-(2-Hydroxyphenyl)-1-phenyl-1H-pyrazol-4-yl)pyrrolo[2,1-f][1,2,4]triazin-4(3H)-one (D18)**

Yellow solid (77%). Mp > 300 °C. <sup>1</sup>H NMR (400 MHz, DMSO-*d*<sub>6</sub>) δ 11.55 (s, 1H), 9.83 (s, 1H), 8.29 (s, 1H), 7.48 – 7.04 (m, 8H), 6.96 – 6.67 (m, 3H), 6.47 (dd, *J* = 4.2, 2.6 Hz, 1H). <sup>13</sup>C NMR (126 MHz, DMSO-*d*<sub>6</sub>) δ 155.71, 155.12, 142.32, 140.20, 140.03, 139.92, 132.56, 131.26, 129.27, 128.17, 124.83, 121.46, 119.22, 118.65, 116.40, 115.99, 113.97, 110.64, 107.64. *m/z* (EI): 369 [M<sup>+</sup>, 100%], 351 (22%), 109 (62%). calcd for C<sub>21</sub>H<sub>15</sub>N<sub>5</sub>O<sub>2</sub>, 369.1226; found, 369.1221 [M<sup>+</sup>].

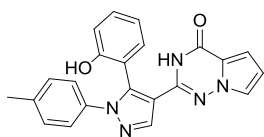

**2-(5-(2-Hydroxyphenyl)-1-(p-tolyl)-1H-pyrazol-4-yl)pyrrolo[2,1-f][1,2,4]triazin-4(3H)-one (D19)**

Yellow solid (72%). Mp > 300 °C. <sup>1</sup>H NMR (300 MHz, DMSO-*d*<sub>6</sub>) δ 11.49 (br s, 1H), 9.79 (br s, 1H), 8.25 (s, 1H), 7.28 – 7.01 (m, 7H), 6.92 – 6.66 (m, 3H), 6.45 (dd, *J* = 4.3, 2.6 Hz, 1H), 2.26 (s, 3H). <sup>13</sup>C NMR (126 MHz, DMSO-*d*<sub>6</sub>) δ 155.70, 155.12, 142.36, 139.98, 139.82, 137.65, 132.56, 131.19, 129.70, 124.70, 121.44, 119.21, 118.64, 116.50, 115.98, 113.80, 110.62, 107.62, 20.98. *m/z* (EI): 383 [M<sup>+</sup>, 100%], 365 (20%), 109 (60%). calcd for C<sub>22</sub>H<sub>17</sub>N<sub>5</sub>O<sub>2</sub>, 383.1382; found; 383.1385 [M<sup>+</sup>].

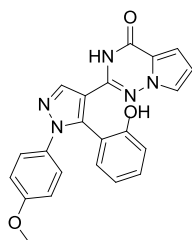

**2-(5-(2-Hydroxyphenyl)-1-(4-methoxyphenyl)-1H-pyrazol-4-yl)pyrrolo[2,1-f][1,2,4]triazin-4(3H)-one (D20)**

Yellow solid (65%). Mp 268-270 °C. <sup>1</sup>H NMR (300 MHz, DMSO-*d*<sub>6</sub>) δ 11.46 (br s, 1H), 9.79 (br s, 1H), 8.23 (br s, 1H), 7.33 – 6.98 (m, 5H), 6.97 – 6.66 (m, 5H), 6.44 (t, *J* = 3.5 Hz, 1H), 3.72 (s, 3H). <sup>13</sup>C NMR (126 MHz, DMSO-*d*<sub>6</sub>) δ 158.92, 155.72, 155.14, 142.41, 138.88, 139.76, 133.09, 132.57, 131.15, 126.38, 121.43, 119.19, 118.63, 116.50, 115.98, 114.33, 113.56, 110.61, 107.61, 55.79. *m/z* (EI): 399 [M<sup>+</sup>, 100%], 381 (18%), 109 (49%). calcd for C<sub>22</sub>H<sub>17</sub>N<sub>5</sub>O<sub>3</sub>, 399.1331; found, 399.1347 [M<sup>+</sup>].



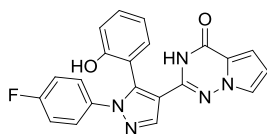

**2-(1-(4-Fluorophenyl)-5-(2-hydroxyphenyl)-1H-pyrazol-4-yl)pyrrolo[2,1-f][1,2,4]triazin-4(3H)-one (D21)**

Yellow solid (75%). Mp 292-293 °C.  $^1\text{H}$  NMR (300 MHz, DMSO-*d*6)  $\delta$  11.52 (s, 1H), 9.84 (s, 1H), 8.26 (s, 1H), 7.34 – 7.24 (m, 2H), 7.25 – 7.09 (m, 5H), 6.84 (dd,  $J$  = 4.3, 1.7 Hz, 1H), 6.82 – 6.72 (m, 2H), 6.45 (dd,  $J$  = 4.3, 2.6 Hz, 1H).  $^{13}\text{C}$  NMR (126 MHz, DMSO-*d*6)  $\delta$  161.47 ((d,  $J$  = 245.57 Hz), 155.66, 155.14, 142.26, 140.24, 140.10, 136.46 (d,  $J$  = 2.9 Hz), 132.59, 131.36, 127.03 (d,  $J$  = 8.8 Hz), 121.46, 119.26, 118.64, 116.16 ((d,  $J$  = 23.44 Hz), 116.15, 116.06, 113.91 (s), 110.65, 107.64.  $m/z$  (EI): 387 [ $\text{M}^+$ , 100%], 369 (22%), 109 (66%). calcd for  $\text{C}_{21}\text{H}_{14}\text{FN}_5\text{O}_2$ , 387.1132;found; 387.1135 [ $\text{M}^+$ ].

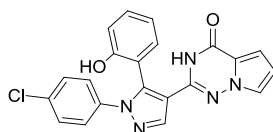

**2-(1-(4-Chlorophenyl)-5-(2-hydroxyphenyl)-1H-pyrazol-4-yl)pyrrolo[2,1-f][1,2,4]triazin-4(3H)-one (D22)**

Yellow solid (64%). Mp > 300 °C.  $^1\text{H}$  NMR (300 MHz, DMSO-*d*6)  $\delta$  11.59 (br s, 1H), 9.81 (br s, 1H), 8.29 (s, 1H), 7.42 (d,  $J$  = 8.3 Hz, 2H), 7.27 - 7.17 (m, 5H), 6.85 - 6.79 (m, 3H), 6.45 (s, 1H).  $^{13}\text{C}$  NMR (126 MHz, DMSO-*d*6)  $\delta$  155.60, 155.12, 142.16, 140.57, 140.04, 138.93, 132.59, 132.58, 131.47, 129.33, 126.35, 121.49, 119.34, 118.65, 116.10, 116.04, 114.17, 110.67, 107.66.  $m/z$  (EI): 405 [ $\text{M}^+$ ,  $\text{Cl}^{37}$ , 37%], 403 [ $\text{M}^+$ ,  $\text{Cl}^{35}$ , 100%], 385 (29%), 109 (96%). calcd for  $\text{C}_{21}\text{H}_{14}\text{ClN}_5\text{O}_2$ , 403.0836;found; 403.0836 [ $\text{M}^+$ ].

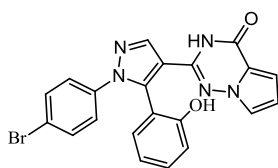

**2-(1-(4-Bromophenyl)-5-(2-hydroxyphenyl)-1H-pyrazol-4-yl)pyrrolo[2,1-f][1,2,4]triazin-4(3H)-one (D23)**

Yellow solid (68%). Mp > 300 °C.  $^1\text{H}$  NMR (300 MHz, DMSO-*d*6)  $\delta$  11.59 (br s, 1H), 9.81 (br s, 1H), 8.30 (s, 1H), 7.55 (d,  $J$  = 8.6 Hz, 2H), 7.40 – 7.04 (m, 5H), 6.82 (dt,  $J$  = 8.2, 4.5 Hz, 3H), 6.45 (dd,  $J$  = 4.1, 2.7 Hz, 1H).  $^{13}\text{C}$  NMR (126 MHz, DMSO-*d*6)  $\delta$  155.58, 155.11, 142.14, 140.61, 140.00, 139.35, 132.59, 132.26, 131.48, 126.61, 121.49, 121.03, 119.35, 118.65, 116.11, 116.03, 114.20, 110.67, 107.67.  $m/z$  (EI): 449 [ $\text{M}^+$ ,  $\text{Br}^{81}$ , 86%], 447 [ $\text{M}^+$ ,  $\text{Br}^{79}$ , 80%], 431 ( $\text{Br}^{81}$ , 18%), 433 ( $\text{Br}^{79}$ , 18%), 109 (74%). calcd for  $\text{C}_{21}\text{H}_{14}\text{BrN}_5\text{O}_2$ , 447.0331;found; 447.0338 [ $\text{M}^+$ ,  $\text{Br}^{79}$ ].

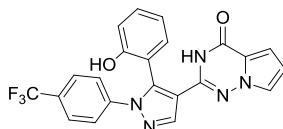

**2-(5-(2-Hydroxyphenyl)-1-(4-(trifluoromethyl)phenyl)-1H-pyrazol-4-yl)pyrrolo[2,1-f][1,2,4]triazin-4(3H)-one (D24)**

Yellow solid (73%). Mp > 300 °C.  $^1\text{H}$  NMR (300 MHz, DMSO-*d*6)  $\delta$  11.65 (br s, 1H), 9.83 (br s, 1H), 8.35 (s, 1H), 7.75 (d,  $J$  = 8.1 Hz, 2H), 7.47 (d,  $J$  = 8.2 Hz, 2H), 7.33 – 7.14 (m, 3H), 6.91 – 6.73 (m, 3H), 6.51 – 6.41 (m, 1H).  $^{13}\text{C}$  NMR (126 MHz, DMSO-*d*6)  $\delta$  155.55, 155.11, 143.29, 142.02, 141.12, 140.21, 132.58, 131.66, 128.13 (q,  $J$  = 32.4 Hz,  $\text{CF}_3\text{C}$ ), 126.60 (q,  $J$  = 3.5 Hz,  $\text{CF}_3\text{CCH}$ ), 124.33 (q,  $J$  = 272.7 Hz,  $\text{CF}_3$ ), 124.90, 121.52, 119.43, 118.66, 116.15, 115.86, 114.62, 110.70, 107.69.  $m/z$  (EI): 437 [ $\text{M}^+$ , 100%], 419 (30%), 109 (86%). calcd for  $\text{C}_{22}\text{H}_{14}\text{F}_3\text{N}_5\text{O}_2$ , 437.1100;found; 437.1103 [ $\text{M}^+$ ].

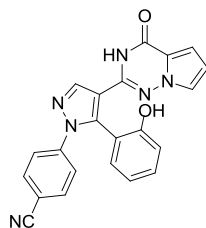

**4-(5-(2-Hydroxyphenyl)-4-(4-oxo-3,4-dihydropyrrolo[2,1-f][1,2,4]triazin-2-yl)-1H-pyrazol-1-yl)benzonitrile (D25)**

Yellow solid (51%). Mp > 300 °C. <sup>1</sup>H NMR (300 MHz, DMSO-*d*6) δ 11.64 (br s, 1H), 9.82 (br s, 1H), 8.35 (s, 1H), 7.85 (d, *J* = 8.4 Hz, 2H), 7.43 (d, *J* = 8.3 Hz, 2H), 7.35 – 7.11 (m, 3H), 6.97 – 6.70 (m, 3H), 6.46 (t, *J* = 3.5 Hz, 1H). <sup>13</sup>C NMR (126 MHz, DMSO-*d*6) δ 155.51, 155.10, 143.59, 141.91, 141.39, 140.26, 133.66, 132.57, 131.76, 124.81, 121.54, 119.48, 118.66, 118.63, 116.21, 115.77, 114.84, 110.73, 110.46, 107.72. *m/z* (EI): 394 [M<sup>+</sup>, 100%], 376 (27%), 109 (70%). calcd for C<sub>22</sub>H<sub>14</sub>N<sub>6</sub>O<sub>2</sub>, 394.1178; found, 394.1177 [M<sup>+</sup>].

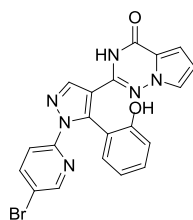

**2-(1-(5-Bromopyridin-2-yl)-5-(2-hydroxyphenyl)-1H-pyrazol-4-yl)pyrrolo[2,1-f][1,2,4]triazin-4(3H)-one (D26)**

Yellow solid (52%). Mp 276-278 °C. <sup>1</sup>H NMR (300 MHz, DMSO-*d*6) δ 11.64 (br s, 1H), 9.62 (br s, 1H), 8.35 (d, *J* = 2.6 Hz, 1H), 8.26 (s, 1H), 8.19 (dd, *J* = 8.6, 2.3 Hz, 1H), 7.58 (d, *J* = 8.6 Hz, 1H), 7.30 (t, *J* = 2.1 Hz, 1H), 7.26 – 7.08 (m, 2H), 6.85 (dd, *J* = 4.2, 1.8 Hz, 1H), 6.83 – 6.67 (m, 2H), 6.47 (dd, *J* = 4.2, 2.5 Hz, 1H). <sup>13</sup>C NMR (126 MHz, DMSO-*d*6) δ 155.14, 155.08, 151.57, 148.91, 142.14, 141.88, 141.28, 140.30, 132.12, 130.96, 121.58, 120.58, 119.27, 119.05, 118.70, 116.53, 115.81, 114.69, 110.71, 107.67. *m/z* (EI): 450 [M<sup>+</sup>, Br<sup>81</sup>, 98%], 448 [M<sup>+</sup>, Br<sup>79</sup>, 100%], 433 (Br<sup>81</sup>, 50%), 431 (Br<sup>79</sup>, 52%), 275 (72%), 109 (74%). calcd for C<sub>20</sub>H<sub>13</sub>BrN<sub>6</sub>O<sub>2</sub>, 448.0283; found; 448.0282 [M<sup>+</sup>, Br<sup>79</sup>].

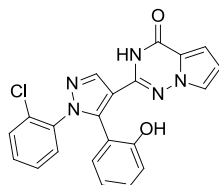

**2-(1-(2-Chlorophenyl)-5-(2-hydroxyphenyl)-1H-pyrazol-4-yl)pyrrolo[2,1-f][1,2,4]triazin-4(3H)-one (D27)**

Yellow solid (66%). Mp > 300 °C. <sup>1</sup>H NMR (300 MHz, DMSO-*d*6) δ 11.58 (br s, 1H), 9.82 (br s, 1H), 8.27 (s, 1H), 7.53 (dd, *J* = 8.1, 1.7 Hz, 1H), 7.49 – 7.31 (m, 3H), 7.22 (dd, *J* = 2.6, 1.5 Hz, 1H), 7.12 (ddd, *J* = 8.6, 7.3, 1.7 Hz, 1H), 7.01 (dd, *J* = 7.6, 1.7 Hz, 1H), 6.84 (dd, *J* = 4.2, 1.6 Hz, 1H), 6.74 (dd, *J* = 8.3, 1.2 Hz, 1H), 6.67 (td, *J* = 7.4, 1.2 Hz, 1H), 6.45 (dd, *J* = 4.2, 2.7 Hz, 1H). <sup>13</sup>C NMR (126 MHz, DMSO-*d*6) δ 155.61, 155.19, 142.56, 141.59, 140.38, 137.33, 131.88, 131.48, 131.38, 131.15, 130.53, 130.39, 128.14, 121.44, 118.85, 118.70, 115.90, 115.61, 113.23, 110.59, 107.59. *m/z* (EI): 405 [M<sup>+</sup>, Cl<sup>37</sup>, 92%], 403 [M<sup>+</sup>, Cl<sup>35</sup>, 33%], 385 (33%), 109 (100%). calcd for C<sub>21</sub>H<sub>14</sub>ClN<sub>5</sub>O<sub>2</sub>, 403.0836; found; 403.0844 [M<sup>+</sup>, Cl<sup>35</sup>].

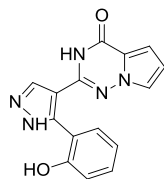

**2-(5-(2-Hydroxyphenyl)-1H-pyrazol-4-yl)pyrrolo[2,1-f][1,2,4]triazin-4(3H)-one (D28)**

Yellow solid (48%). Mp 282-283 °C. <sup>1</sup>H NMR (300 MHz, DMSO-*d*6) δ 13.31 (br s, 1H), 11.54 (s, 1H), 9.87 (s, 1H), 8.08 (br s, 1H), 7.63 – 7.28 (m, 2H), 7.22 (t, *J* = 7.6 Hz, 1H), 6.87 (t, *J* = 7.1 Hz, 3H), 6.48 (d, *J* = 4.4 Hz, 1H). <sup>13</sup>C NMR (126 MHz, DMSO-*d*6) δ 155.33, 155.10, 147.71, 143.80, 139.89, 139.44, 131.49, 131.12, 130.70,

121.40, 119.33, 118.79, 116.40, 116.20, 111.62, 110.43, 107.35.  $m/z$  (EI): 293 [ $M^+$ , 100%], 275 (32%), 109 (60%), 108 (11%). calcd for  $C_{15}H_{11}N_5O_2$ , 293.0913;found, 293.0914 [ $M^+$ ].

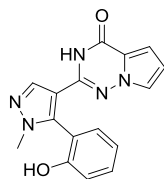

**2-(5-(2-Hydroxyphenyl)-1-methyl-1H-pyrazol-4-yl)pyrrolo[2,1-f][1,2,4]triazin-4(3H)-one (D29)**

Yellow solid (49%). Mp 291-292 °C.  $^1H$  NMR (300 MHz, DMSO- $d_6$ )  $\delta$  11.43 (br s, 1H), 9.92 (br s, 1H), 8.02 (s, 1H), 7.28 (d,  $J$  = 7.9 Hz, 2H), 7.16 (s, 1H), 7.04 – 6.85 (m, 2H), 6.81 (s, 1H), 6.42 (s, 1H), 3.65 (s, 3H).  $^{13}C$  NMR (126 MHz, DMSO- $d_6$ )  $\delta$  155.60, 155.20, 142.63, 140.13, 138.42, 132.57, 131.26, 121.32, 119.30, 118.61, 116.22, 116.13, 112.06, 110.50, 107.49, 37.59.  $m/z$  (EI): 307 [ $M^+$ , 100%], 289 (12%), 109 (53%). calcd for  $C_{16}H_{13}N_5O_2$ , 307.1069;found; 307.1069 [ $M^+$ ].

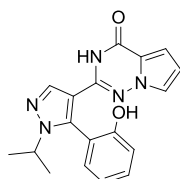

**2-(5-(2-Hydroxyphenyl)-1-isopropyl-1H-pyrazol-4-yl)pyrrolo[2,1-f][1,2,4]triazin-4(3H)-one (D30)**

Yellow solid (48%). Mp 292 °C decomposed.  $^1H$  NMR (500 MHz, DMSO- $d_6$ )  $\delta$  11.36 (s, 1H), 9.88 (s, 1H), 8.11 (s, 1H), 7.30 (td,  $J$  = 7.8, 1.8 Hz, 1H), 7.23 (dd,  $J$  = 7.8, 1.7 Hz, 1H), 7.10 (t,  $J$  = 2.2 Hz, 1H), 6.94 (d,  $J$  = 8.2 Hz, 1H), 6.90 (t,  $J$  = 7.4 Hz, 1H), 6.80 (dd,  $J$  = 4.3, 1.8 Hz, 1H), 6.41 (dd,  $J$  = 4.2, 2.6 Hz, 1H), 4.22 (dt,  $J$  = 13.1, 6.6 Hz, 1H), 1.37 (d,  $J$  = 6.6 Hz, 3H), 1.29 (d,  $J$  = 6.6 Hz, 3H).  $^{13}C$  NMR (126 MHz, DMSO- $d_6$ )  $\delta$  155.74, 155.14, 142.61, 139.03, 138.65, 132.47, 131.21, 121.27, 119.44, 118.60, 116.39, 116.16, 111.50, 110.48, 107.50, 50.65, 23.23, 22.52.  $m/z$  (EI): 335 [ $M^+$ , 100%], 320 (36%), 109 (66%). calcd for  $C_{18}H_{17}N_5O_2$ , 335.1382;found; 335.1385 [ $M^+$ ].

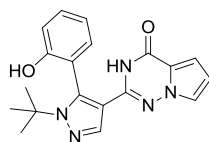

**2-(1-(tert-Butyl)-5-(2-hydroxyphenyl)-1H-pyrazol-4-yl)pyrrolo[2,1-f][1,2,4]triazin-4(3H)-one (D31)**

Yellow solid (65%). Mp 248-250 °C.  $^1H$  NMR (400 MHz, DMSO- $d_6$ )  $\delta$  11.51 (s, 1H), 9.76 (s, 1H), 8.38 (s, 1H), 7.45 – 7.37 (m, 2H), 7.18 (td,  $J$  = 8.1, 1.8 Hz, 1H), 6.89 – 6.80 (m, 3H), 6.49 (dd,  $J$  = 4.3, 2.6 Hz, 1H), 1.60 (s, 9H).  $^{13}C$  NMR (126 MHz, DMSO- $d_6$ )  $\delta$  155.26, 155.24, 146.88, 143.64, 130.57, 129.84, 129.71, 121.40, 120.00, 119.27, 118.82, 116.09, 111.53, 110.45, 107.38, 59.42, 29.72.  $m/z$  (EI): 349 [ $M^+$ , 100%], 331 (5%), 293 (46%), 275 (63%), 109 (90%). calcd for  $C_{19}H_{19}N_5O_2$ , 349.1539;found, 349.1542 [ $M^+$ ].

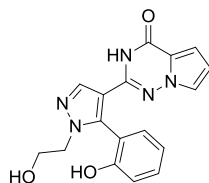

**2-(1-(2-Hydroxyethyl)-5-(2-hydroxyphenyl)-1H-pyrazol-4-yl)pyrrolo[2,1-f][1,2,4]triazin-4(3H)-one (D32)**

Yellow solid (63%). Mp 210-212 °C.  $^1H$  NMR (300 MHz, DMSO- $d_6$ )  $\delta$  11.39 (br s, 1H), 9.86 (br s, 1H), 8.07 (s, 1H), 7.29 (t,  $J$  = 6.9 Hz, 2H), 7.17 – 7.06 (m, 1H), 6.98 – 6.84 (m, 2H), 6.81 (dd,  $J$  = 3.7, 1.9 Hz, 1H), 6.42 (dd,  $J$  = 4.3, 2.3 Hz, 1H), 4.82 (br s, 1H), 3.96 (t,  $J$  = 6.4 Hz, 2H), 3.66 (br s, 2H).  $^{13}C$  NMR (126 MHz, DMSO- $d_6$ )  $\delta$  155.58, 155.18, 142.62, 140.37, 138.75, 132.81, 131.18, 121.30, 119.32, 118.60, 116.21, 116.14, 111.97, 110.49, 107.49, 60.05, 51.87.  $m/z$  (EI): 337 [ $M^+$ , 100%], 319 (14%), 294 (22%), 109 (64%). calcd for  $C_{17}H_{15}N_5O_3$ , 337.1175;found; 337.1181 [ $M^+$ ].

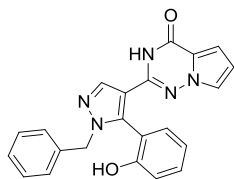

**2-(1-Benzyl-5-(2-hydroxyphenyl)-1H-pyrazol-4-yl)pyrrolo[2,1-f][1,2,4]triazin-4(3H)-one (D33)**

Yellow solid (70%). Mp 258-259 °C. <sup>1</sup>H NMR (300 MHz, DMSO-*d*6) δ 9.96 (br s, 1H), 8.10 (s, 1H), 7.37 – 7.09 (m, 6H), 7.04 – 6.91 (m, 3H), 6.90 – 6.77 (m, 2H), 6.42 (dd, *J* = 4.2, 2.5 Hz, 1H), 5.18 (s, 2H). <sup>13</sup>C NMR (126 MHz, DMSO-*d*6) δ 155.56, 155.16, 142.55, 140.42, 139.19, 137.37, 132.48, 131.37, 128.79, 127.89, 127.70, 121.34, 119.37, 118.61, 116.25, 116.06, 112.42, 110.53, 107.53, 53.26. *m/z* (EI): 383 [M<sup>+</sup>, 100%], 279 (17%), 109 (78%), 91 (78%). calcd for C<sub>22</sub>H<sub>17</sub>N<sub>5</sub>O<sub>2</sub>, 307.1069;found; 383.1382 [M<sup>+</sup>].

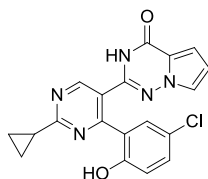

**2-(4-(5-Chloro-2-hydroxyphenyl)-2-cyclopropylpyrimidin-5-yl)pyrrolo[2,1-f][1,2,4]triazin-4(3H)-one (D34)**

Yellow solid (58%). Mp 266-267 °C. yellow solid <sup>1</sup>H NMR (300 MHz, DMSO-*d*6) δ 11.85 (s, 1H), 10.25 (s, 1H), 8.85 (s, 1H), 7.55 (d, *J* = 2.7 Hz, 1H), 7.44 (dd, *J* = 2.6, 1.7 Hz, 1H), 7.29 (dd, *J* = 8.7, 2.8 Hz, 1H), 6.89 (dd, *J* = 4.3, 1.6 Hz, 1H), 6.72 (d, *J* = 8.7 Hz, 1H), 6.50 (dd, *J* = 4.3, 2.7 Hz, 1H), 2.43 – 2.27 (m, 1H), 1.24 – 1.03 (m, 4H). <sup>13</sup>C NMR (126 MHz, DMSO-*d*6) δ 172.61, 160.99, 158.07, 155.26, 154.22, 145.99, 131.38, 131.28, 126.22, 122.97, 122.72, 121.77, 118.89, 117.48, 110.78, 107.67, 18.64, 11.67. *m/z* (EI):381 [M<sup>+</sup>, Cl<sup>37</sup> 36%], 379 [M<sup>+</sup>, Cl<sup>35</sup> 100%], 362 (68%), 344 (38%), 109 (70%). calcd for C<sub>19</sub>H<sub>14</sub>ClN<sub>5</sub>O<sub>2</sub>, 379.0836;found,379.0835 [M<sup>+</sup>].

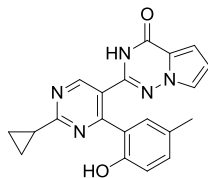

**2-(2-Cyclopropyl-4-(2-hydroxy-5-methylphenyl)pyrimidin-5-yl)pyrrolo[2,1-f][1,2,4]triazin-4(3H)-one (D35)**

Yellow solid (69%). Mp 235-236 °C. yellow solid <sup>1</sup>H NMR (300 MHz, DMSO-*d*6) δ 11.78 (s, 1H), 9.75 (s, 1H), 8.80 (s, 1H), 7.41 (br, 1H), 7.37 (br, 1H), 7.05 (d, *J* = 8.2 Hz, 1H), 6.88 (d, *J* = 3.9 Hz, 1H), 6.61 (d, *J* = 8.3 Hz, 1H), 6.49 (s, 1H), 2.34-2.30 (s, 1H), 2.26 (s, 3H), 1.14 (d, *J* = 7.8 Hz, 4H). <sup>13</sup>C NMR (126 MHz, DMSO-*d*6) δ 172.26, 162.46, 157.91, 155.27, 153.22, 146.35, 132.36, 132.19, 127.84, 123.93, 122.65, 121.69, 118.94, 115.70, 110.67, 107.53, 20.60, 18.62, 11.47. *m/z* (EI):359 [M<sup>+</sup>, 100%], 342 (66%), 109 (46%). calcd for C<sub>20</sub>H<sub>17</sub>N<sub>5</sub>O<sub>2</sub>, 359.1382;found, 359.1382[M<sup>+</sup>]

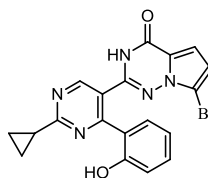

**7-Bromo-2-(2-cyclopropyl-4-(2-hydroxyphenyl)pyrimidin-5-yl)pyrrolo[2,1-f][1,2,4]triazin-4(3H)-one (D36)**

Yellow solid (82%). Mp 278-279 °C. <sup>1</sup>H NMR (300 MHz, DMSO-*d*6) δ 12.08 (br s, 1H), 9.93 (br s, 1H), 8.83 (s, 1H), 7.55 (dd, *J* = 7.7, 1.8 Hz, 1H), 7.24 (td, *J* = 7.9, 1.8 Hz, 1H), 6.98 (d, *J* = 4.5 Hz, 1H), 6.93 (td, *J* = 7.5, 1.0 Hz, 1H), 6.73 – 6.63 (m, 2H), 2.33 (tt, *J* = 7.1, 5.4 Hz, 1H), 1.22 – 1.04 (m, 4H). <sup>13</sup>C NMR (101 MHz, DMSO-*d*6) δ 174.00, 164.26, 159.21, 156.56, 156.13, 148.27, 125.87, 123.81, 121.65, 121.01, 117.10, 114.62, 109.84, 104.65, 20.07, 12.98. *m/z* (EI): 425[M<sup>+</sup>, Br<sup>81</sup>, 98%], 423 [M<sup>+</sup>, Br<sup>79</sup>, 100%], 408 (Br<sup>81</sup>, 72%), 406 (Br<sup>79</sup>, 68%), 252 (68%),

189 (56%). calcd for  $C_{19}H_{14}BrN_5O_2$ , 423.0330; found; 423.0331 [ $M^+$ ,  $Br^{79}$ ].

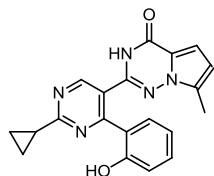

**2-(2-Cyclopropyl-4-(2-hydroxyphenyl)pyrimidin-5-yl)-7-methylpyrrolo[2,1-f][1,2,4]triazin-4(3H)-one (D37)**

Yellow solid (84%). Mp 244-245 °C.  $^1H$  NMR (300 MHz, DMSO-*d*6)  $\delta$  11.85 (s, 1H), 9.87 (s, 1H), 8.84 (s, 1H), 7.49 (dd,  $J = 7.6, 1.8$  Hz, 1H), 7.23 (t,  $J = 7.7$  Hz, 1H), 6.93 (t,  $J = 7.5$  Hz, 1H), 6.80 (d,  $J = 4.2$  Hz, 1H), 6.67 (d,  $J = 8.3$  Hz, 1H), 6.28 (d,  $J = 4.7$  Hz, 1H), 2.40 – 2.24 (m, 1H), 1.93 (s, 3H), 1.21 – 1.06 (m, 4H).  $^{13}C$  NMR (126 MHz, DMSO-*d*6)  $\delta$  172.32, 163.10, 157.46, 155.29, 154.96, 144.97, 131.52, 131.16, 129.61, 125.18, 122.66, 119.41, 118.02, 115.45, 109.72, 106.91, 18.58, 11.45, 10.56.  $m/z$  (EI): 359 [ $M^+$ , 100%], 342 (72%), 123 (38%). calcd for  $C_{20}H_{17}N_5O_2$ , 359.1382; found, 359.1380 [ $M^+$ ].

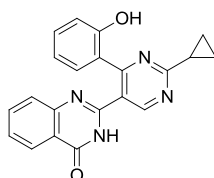

**2-(2-Cyclopropyl-4-(2-hydroxyphenyl)pyrimidin-5-yl)quinazolin-4(3H)-one (D38)**

Yellow solid (82%). Mp 216-218 °C.  $^1H$  NMR (300 MHz, DMSO-*d*6)  $\delta$  12.32 (br s, 1H), 9.87 (br s, 1H), 8.82 (s, 1H), 8.09 (d,  $J = 7.9$  Hz, 1H), 7.87 – 7.64 (m, 1H), 7.54 (dd,  $J = 7.7, 1.8$  Hz, 1H), 7.46 (dd,  $J = 8.3, 6.8$  Hz, 1H), 7.40 (d,  $J = 8.2$  Hz, 1H), 7.20 (t,  $J = 7.7$  Hz, 1H), 6.90 (t,  $J = 7.4$  Hz, 1H), 6.63 (d,  $J = 8.2$  Hz, 1H), 2.38 – 2.24 (m, 1H), 1.18 – 1.06 (m, 4H).  $^{13}C$  NMR (126 MHz, DMSO-*d*6)  $\delta$  171.98, 162.44, 162.26, 157.72, 155.51, 152.56, 149.35, 134.76, 132.00, 131.67, 127.73, 126.95, 126.19, 125.22, 124.42, 121.45, 119.46, 115.71, 18.59, 11.44.  $m/z$  (EI): 356 [ $M^+$ , 60%], 339 (100%), 120 (30%). calcd for  $C_{21}H_{16}N_4O_2$ , 356.1273; found, 356.1281 [ $M^+$ ].

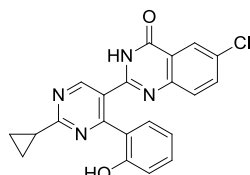

**6-Chloro-2-(2-cyclopropyl-4-(2-hydroxyphenyl)pyrimidin-5-yl)quinazolin-4(3H)-one (D39)**

Yellow solid (65%). Mp 228-230 °C. yellow solid  $^1H$  NMR (300 MHz, DMSO-*d*6)  $\delta$  12.56 (s, 1H), 9.83 (s, 1H), 8.82 (s, 1H), 8.03 (s, 1H), 7.74 (d,  $J = 7.4$  Hz, 1H), 7.55 (d,  $J = 7.5$  Hz, 1H), 7.41 (d,  $J = 8.6$  Hz, 1H), 7.19 (t,  $J = 7.4$  Hz, 1H), 6.91 (t,  $J = 7.2$  Hz, 1H), 6.62 (d,  $J = 8.4$  Hz, 1H), 2.31 (s, 1H), 1.11 (s, 4H).  $^{13}C$  NMR (126 MHz, DMSO-*d*6)  $\delta$  172.19, 162.47, 161.38, 157.71, 155.45, 153.22, 148.10, 134.93, 132.07, 131.75, 131.22, 129.98, 125.22, 125.00, 124.43, 122.70, 119.56, 115.70, 18.63, 11.49.  $m/z$  (EI): 392 [ $M^+$ ,  $Cl^{37}$  25%], 390 [ $M^+$ ,  $Cl^{35}$  67%], 373 (100%), 154 (30%). calcd for  $C_{21}H_{15}ClN_4O_2$ , 390.0884; found, 390.0883 [ $M^+$ ].

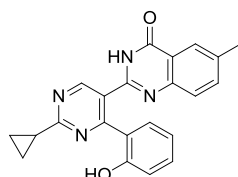

**2-(2-Cyclopropyl-4-(2-hydroxyphenyl)pyrimidin-5-yl)-6-methylquinazolin-4(3H)-one (D40)**

Yellow solid (72%). Mp 272-273 °C. <sup>1</sup>H NMR (300 MHz, DMSO-*d*<sub>6</sub>) δ 12.25 (s, 1H), 9.89 (s, 1H), 8.83 (s, 1H), 7.90 (s, 1H), 7.68 – 7.40 (m, 2H), 7.32 (d, *J* = 8.3 Hz, 1H), 7.24 - 7.18 (m, 1H), 6.91 (t, *J* = 7.1 Hz, 1H), 6.65 (d, *J* = 7.7 Hz, 1H), 2.43 (s, 3H), 2.37 - 2.29 (m, 1H), 1.30 – 0.94 (m, 4H). <sup>13</sup>C NMR (126 MHz, DMSO-*d*<sub>6</sub>) δ 171.88, 162.48, 162.20, 157.73, 155.59, 151.67, 147.40, 136.71, 136.0, 131.96, 131.65, 127.64, 125.58, 125.28, 124.43, 121.23, 119.45, 115.75, 21.28, 18.58, 11.42. *m/z* (EI): 370 [M<sup>+</sup>, 52%], 353 (100%), 134 (26%). calcd for C<sub>22</sub>H<sub>18</sub>N<sub>4</sub>O<sub>2</sub>, 370.1430;found, 370.1430 [M<sup>+</sup>].

## 2. Notes and References

1. R.G. Nandgaonkar and V.N. Ingle, *Asian J. Chem.*, 2005, **17**, 2016-2018.
2. J. Hynes, W. W. Doubleday, A. J. Dyckman, J. D. Godfrey, J. A. Grosso, S. Kiau and K. Leftheris, *J Org Chem*, 2004, **69**, 1368-1371.
3. M. W. Bundesmann, S. B. Coffey and S. W. Wright, *Tetrahedron Lett*, 2010, **51**, 3879-3882.

### 3. X-ray crystallography of compound D17, D23 and D30

Datablock: H\_Report\_20120067\_20120067.CIF - ellipsoid plot

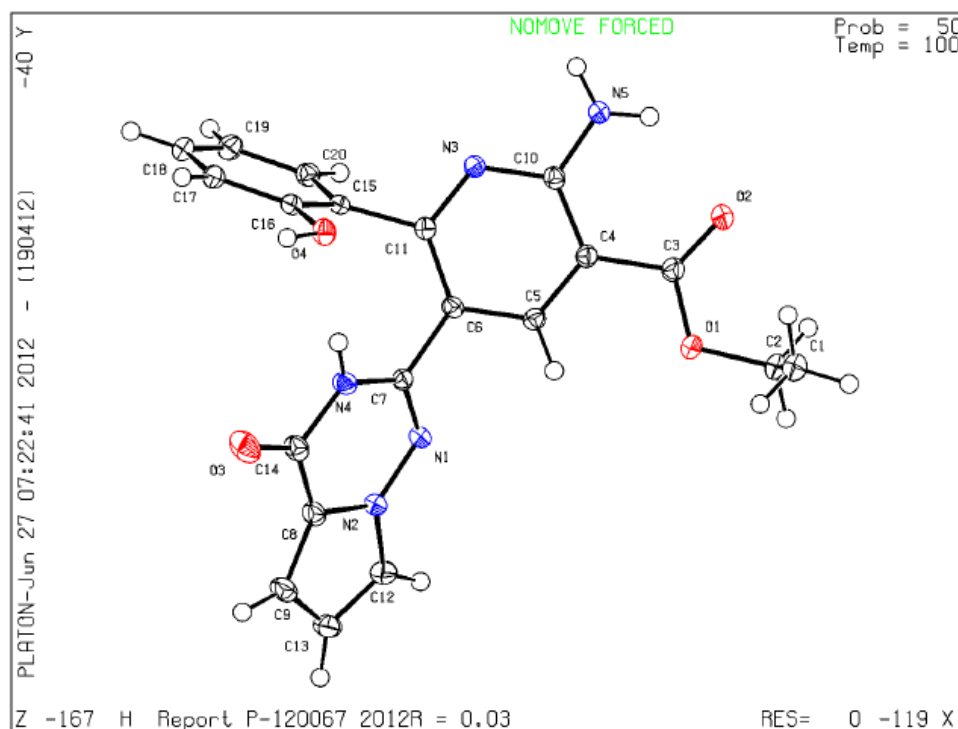

#### D17

A specimen of  $C_{20}H_{17}N_5O_4$  was used for the X-ray crystallographic analysis. The X-ray intensity data were measured.

The total exposure time was 5.58 hours. The frames were integrated with the Bruker SAINT software package using a narrow-frame algorithm. The integration of the data using a triclinic unit cell yielded a total of 11939 reflections to a maximum  $\theta$  angle of  $27.57^\circ$  ( $0.77 \text{ \AA}$  resolution), of which 4057 were independent (average redundancy 2.943, completeness = 96.8%,  $R_{\text{int}} = 1.43\%$ ,  $R_{\text{sig}} = 1.23\%$ ) and 3810 (93.91%) were greater than  $2\sigma(F^2)$ . The final cell constants of  $a = 7.1731(2) \text{ \AA}$ ,  $b = 9.0580(3) \text{ \AA}$ ,  $c = 15.2735(5) \text{ \AA}$ ,  $\alpha = 96.9650(10)^\circ$ ,  $\beta = 93.3370(10)^\circ$ ,  $\gamma = 112.6080(10)^\circ$ , volume =  $903.39(5) \text{ \AA}^3$ , are based upon the refinement of the XYZ-centroids of 9559 reflections above  $20 \sigma(I)$  with  $4.931^\circ < 2\theta < 55.07^\circ$ . Data were corrected for absorption effects using the multi-scan method (SADABS). The ratio of minimum to maximum apparent transmission was 0.926.

The structure was solved and refined using the Bruker SHELXTL Software Package, using the space group P -1, with  $Z = 2$  for the formula unit,  $C_{20}H_{17}N_5O_4$ . The final anisotropic full-matrix least-squares refinement on  $F^2$  with 273 variables converged at  $R1 = 3.43\%$ , for the observed data and  $wR2 = 9.31\%$  for all data. The goodness-of-fit was 1.055. The largest peak in the final difference electron density synthesis was  $0.362 \text{ e}^-/\text{\AA}^3$  and the largest hole was  $-0.232 \text{ e}^-/\text{\AA}^3$  with an RMS deviation of  $0.045 \text{ e}^-/\text{\AA}^3$ . On the basis of the final model, the calculated density was  $1.439 \text{ g/cm}^3$  and  $F(000)$ , 408  $e^-$ .

The crystal structure for **D17** has been deposited at the Cambridge Crystallographic Data Center and allocated the reference no. CCDC 909193.

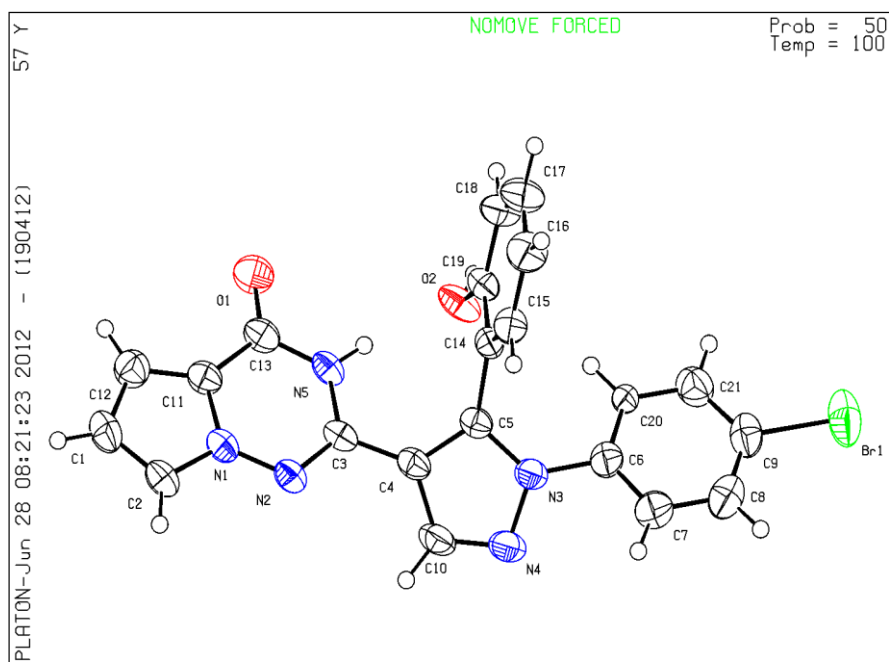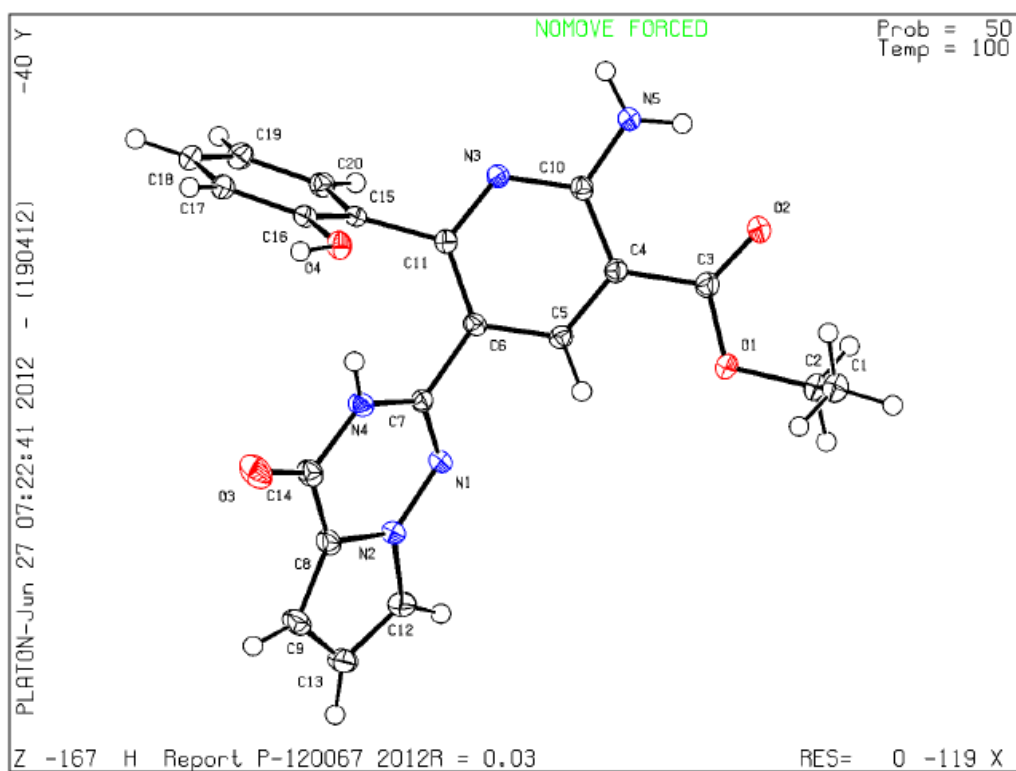

ured.

ing a narrow-  
imum  $\theta$  angle  
9.3%, Rint =  
= 10.4533(7)  
used upon the  
corrected for  
mission was

with Z = 2 for  
les converged  
ak in the final  
on of 0.056 e-

: reference no.



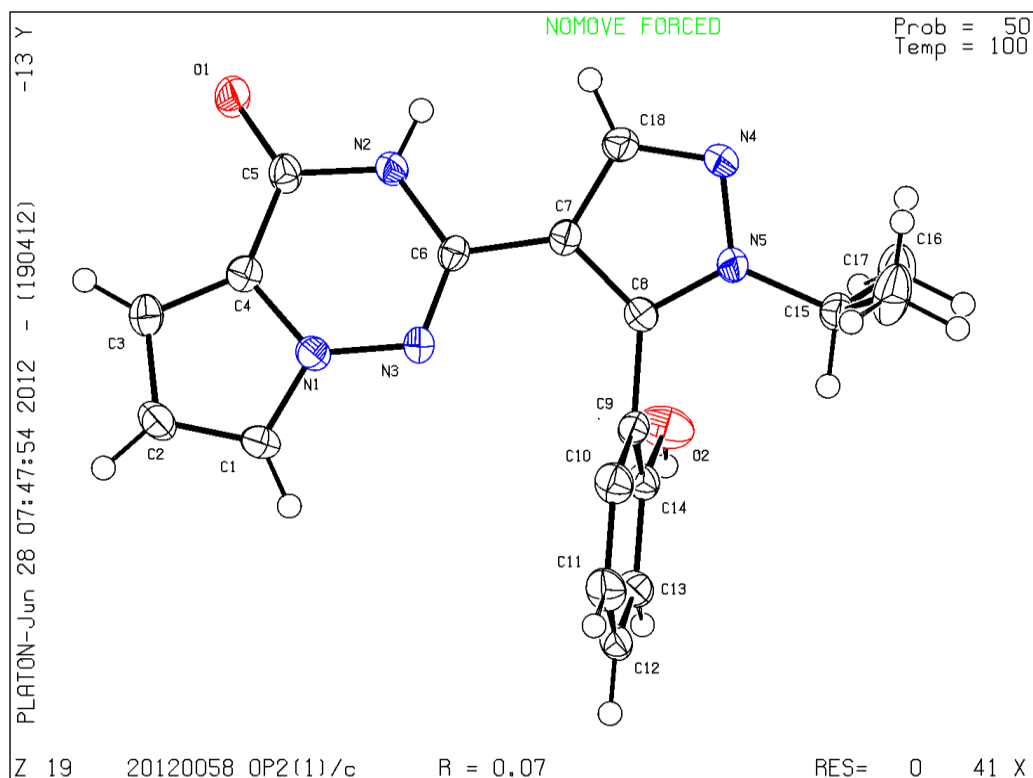

### D30

A specimen of  $C_{18}H_{17}N_5O_2$  was used for the X-ray crystallographic analysis. The X-ray intensity data were measured.

The total exposure time was 1.90 hours. The frames were integrated with the Bruker SAINT software package using a narrow-frame algorithm. The integration of the data using a monoclinic unit cell yielded a total of 9884 reflections to a maximum  $\theta$  angle of  $25.00^\circ$  ( $0.84 \text{ \AA}$  resolution), of which 2794 were independent (average redundancy 3.538, completeness = 97.4%,  $R_{\text{int}} = 5.08\%$ ,  $R_{\text{sig}} = 4.98\%$ ) and 2495 (89.30%) were greater than  $2\sigma(F^2)$ . The final cell constants of  $a = 16.640(8) \text{ \AA}$ ,  $b = 7.053(4) \text{ \AA}$ ,  $c = 14.173(7) \text{ \AA}$ ,  $\beta = 101.753(8)^\circ$ , volume =  $1628.5(14) \text{ \AA}^3$ , are based upon the refinement of the XYZ-centroids of 7950 reflections above  $20 \sigma(I)$  with  $5.001^\circ < 2\theta < 55.31^\circ$ . Data were corrected for absorption effects using the multi-scan method (SADABS). The ratio of minimum to maximum apparent transmission was 0.807.

The structure was solved and refined using the Bruker SHELXTL Software Package, using the space group  $P 1 21/c 1$ , with  $Z = 4$  for the formula unit,  $C_{18}H_{16}N_5O_2$ . The final anisotropic full-matrix least-squares refinement on  $F^2$  with 239 variables converged at  $R1 = 7.36\%$ , for the observed data and  $wR2 = 21.33\%$  for all data. The goodness-of-fit was 1.106. The largest peak in the final difference electron density synthesis was  $0.448 \text{ e}^-/\text{\AA}^3$  and the largest hole was  $-0.485 \text{ e}^-/\text{\AA}^3$  with an RMS deviation of  $0.089 \text{ e}^-/\text{\AA}^3$ . On the basis of the final model, the calculated density was  $1.364 \text{ g/cm}^3$  and  $F(000)$ , 700  $e^-$ .

The crystal structure for **D30** has been deposited at the Cambridge Crystallographic Data Center and allocated the reference no. CCDC 909191.

#### 4. $^1\text{H}$ NMR and $^{13}\text{C}$ NMR

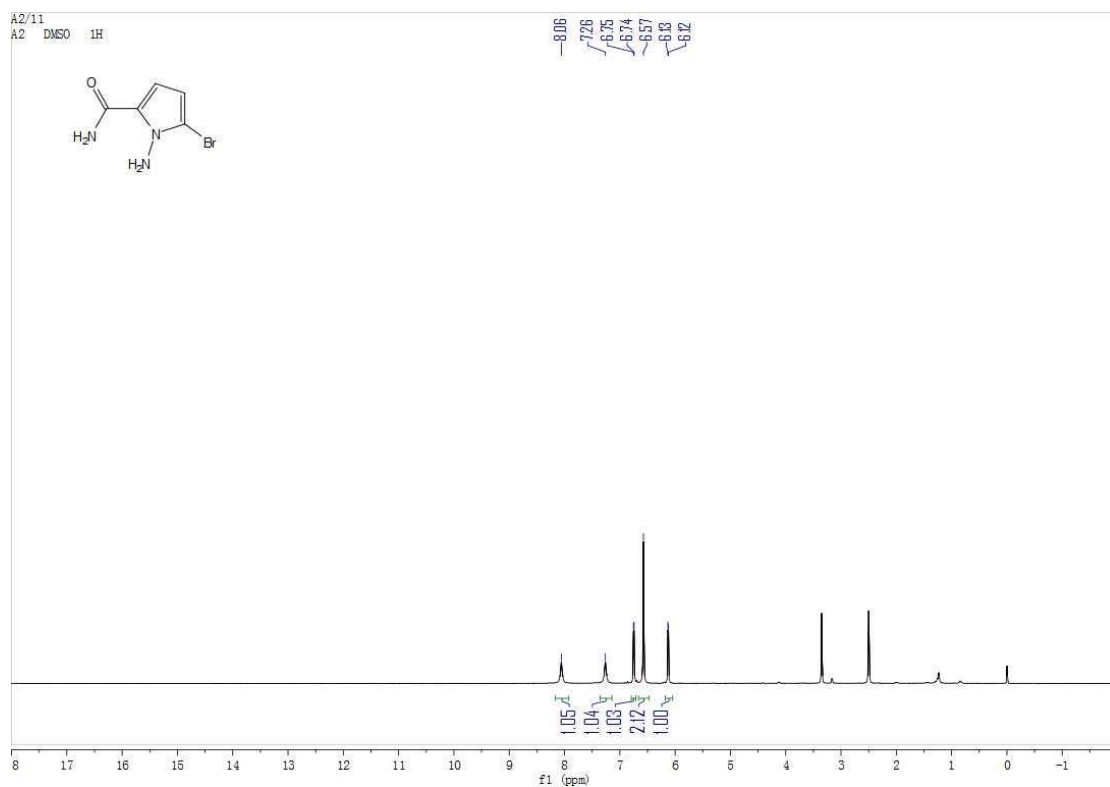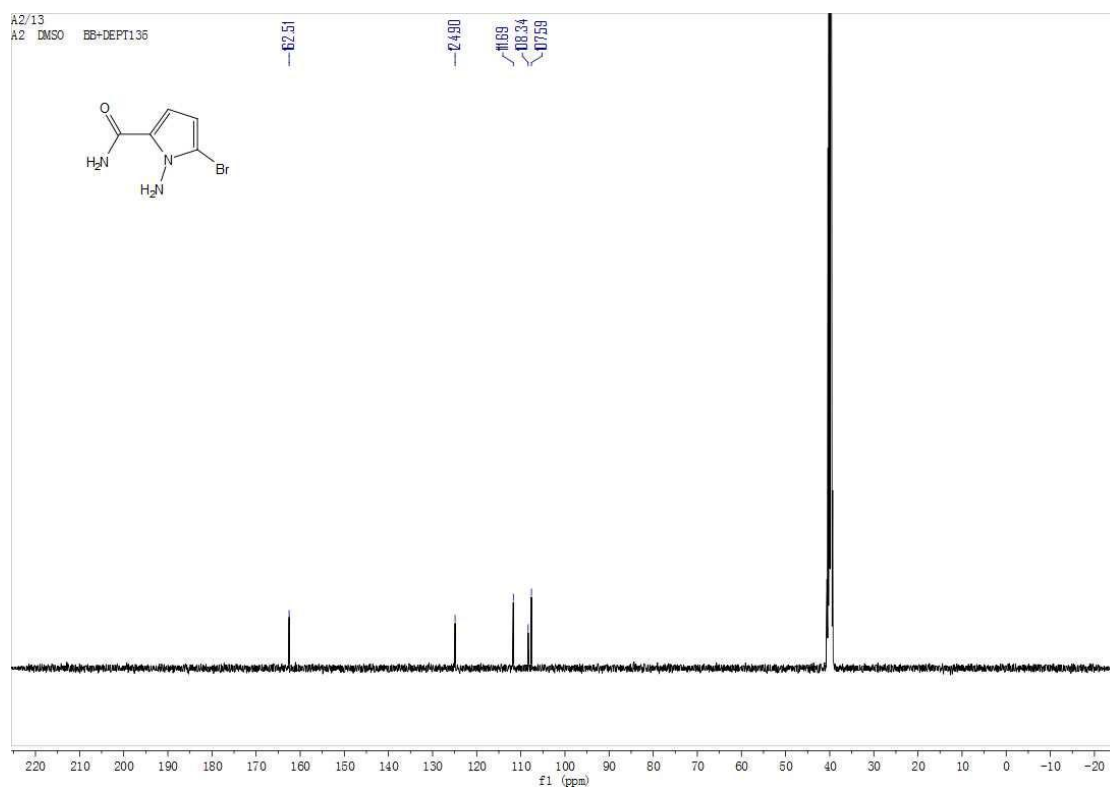

A2

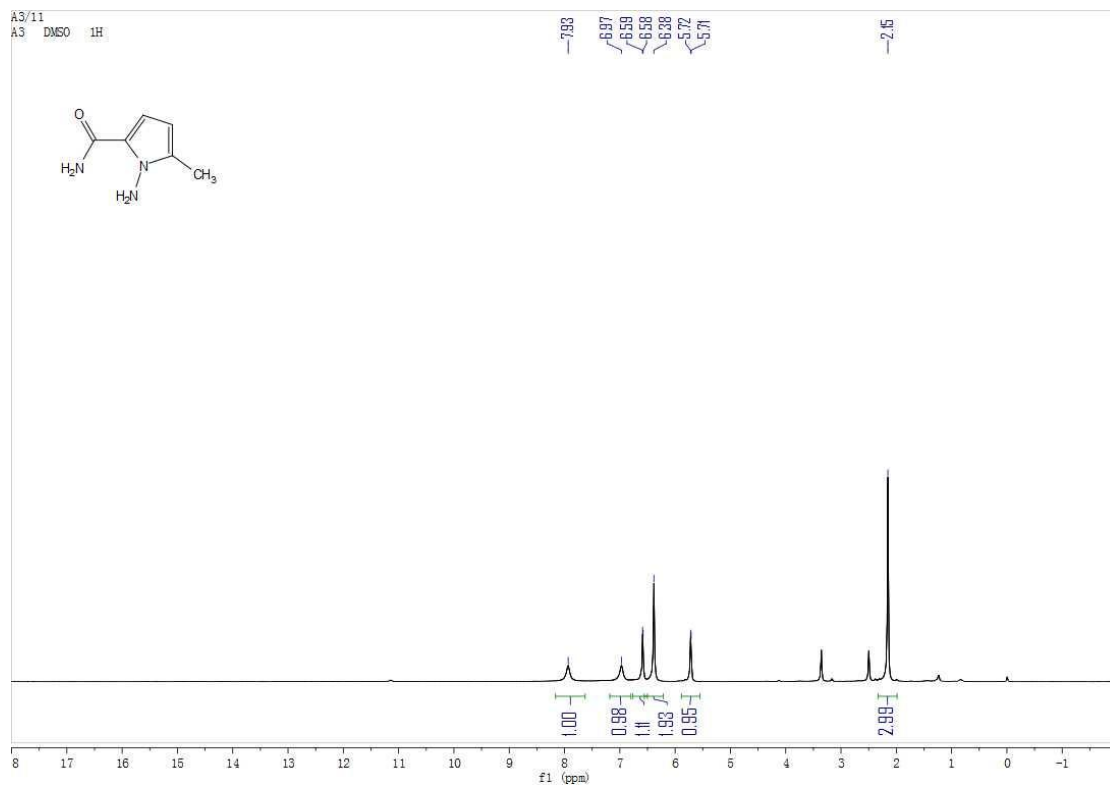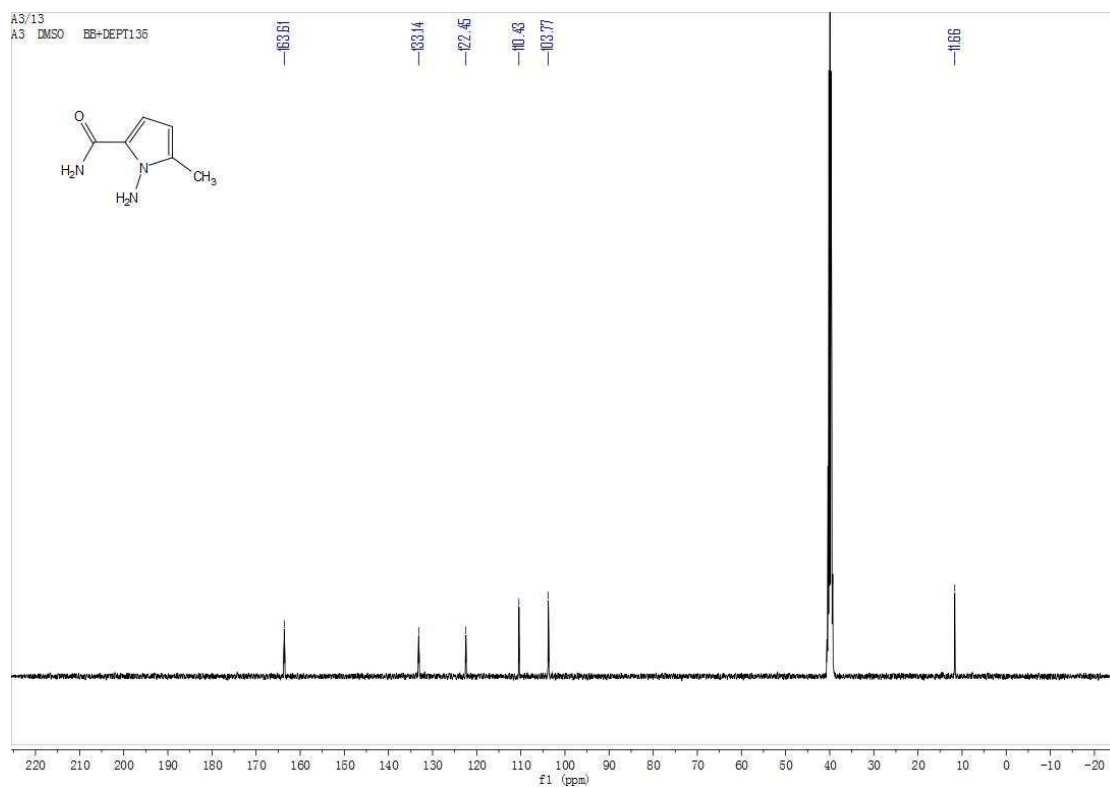

A3

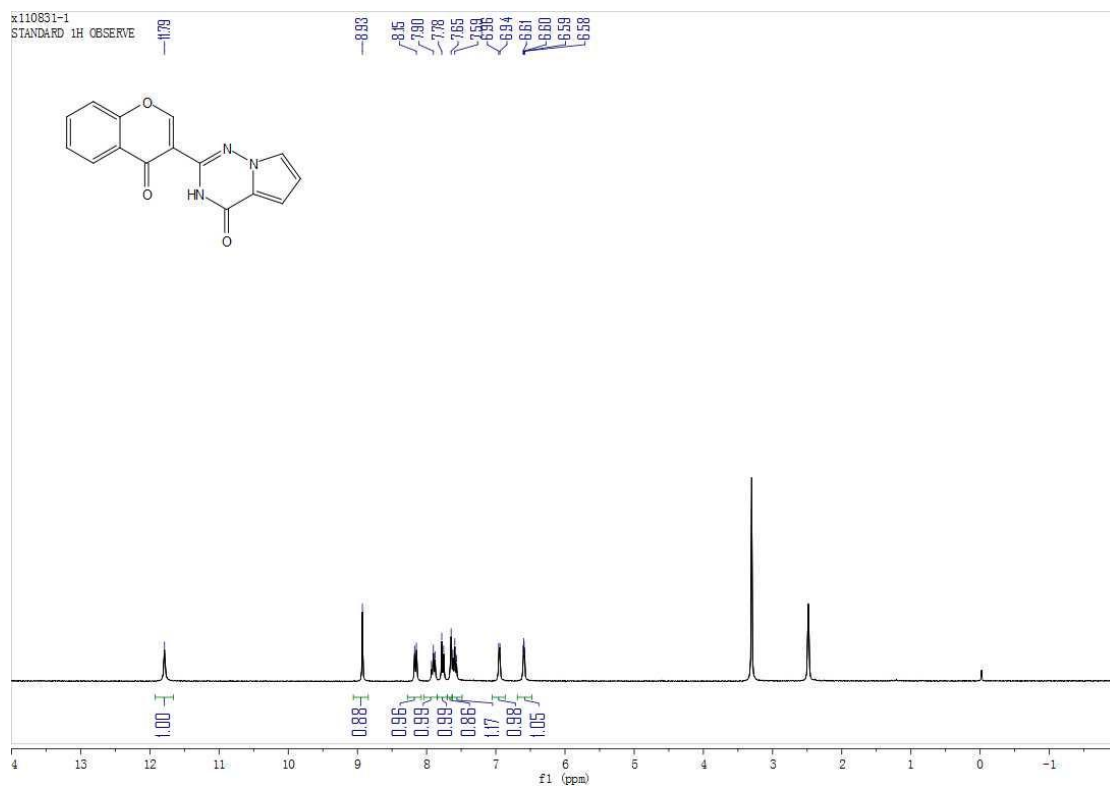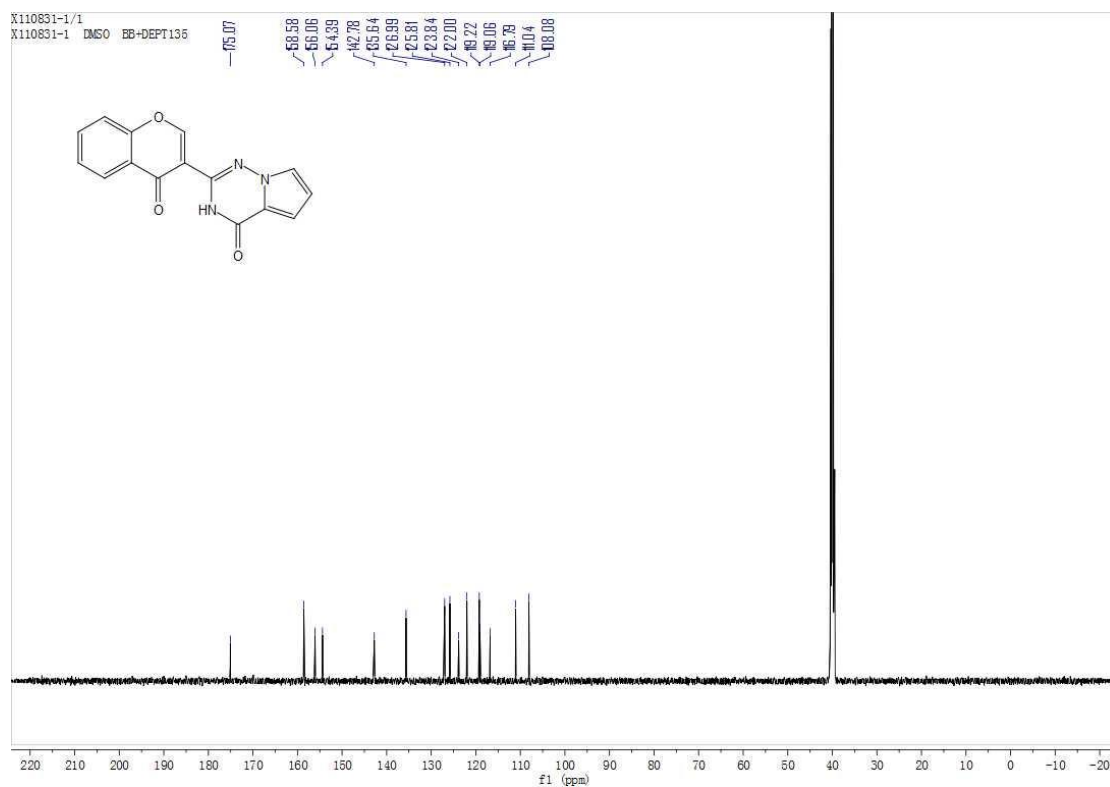

C1

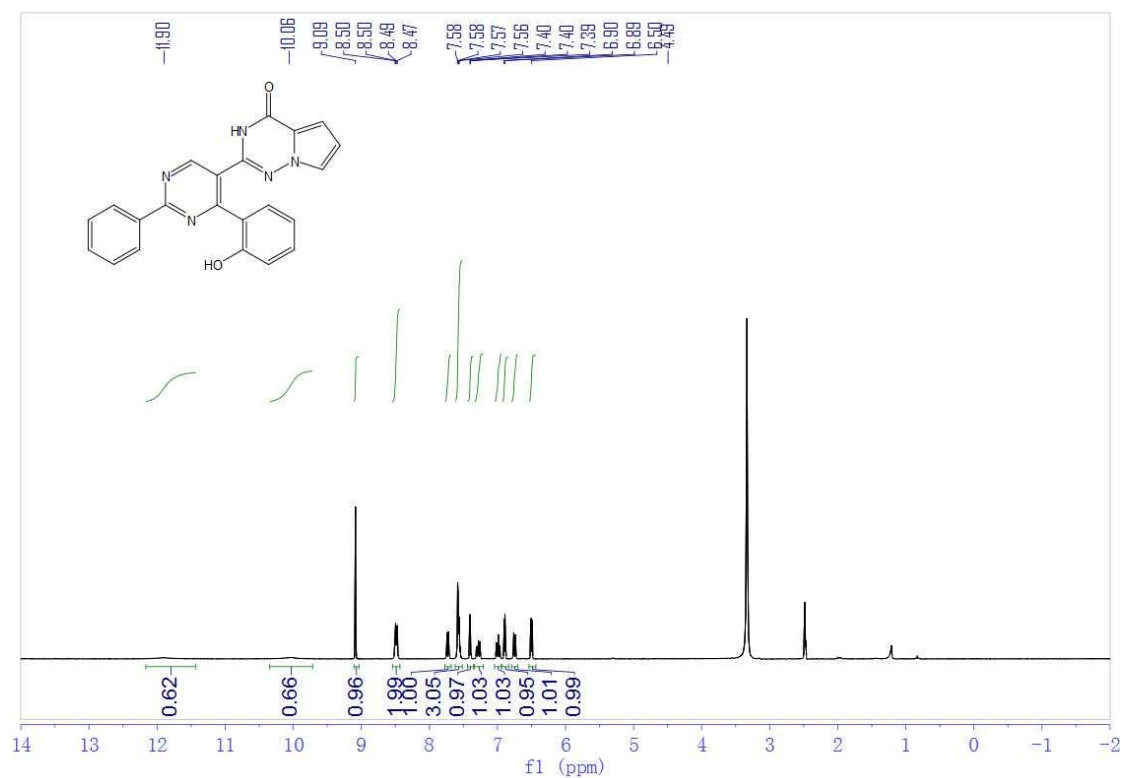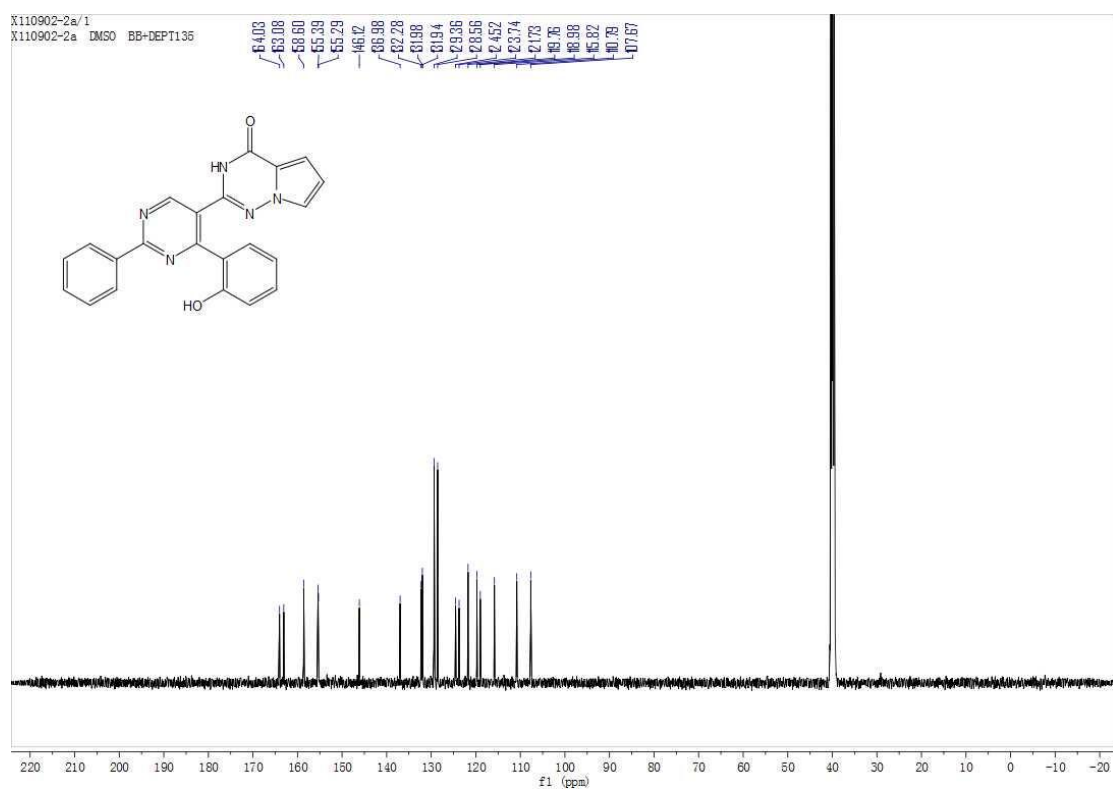

D1

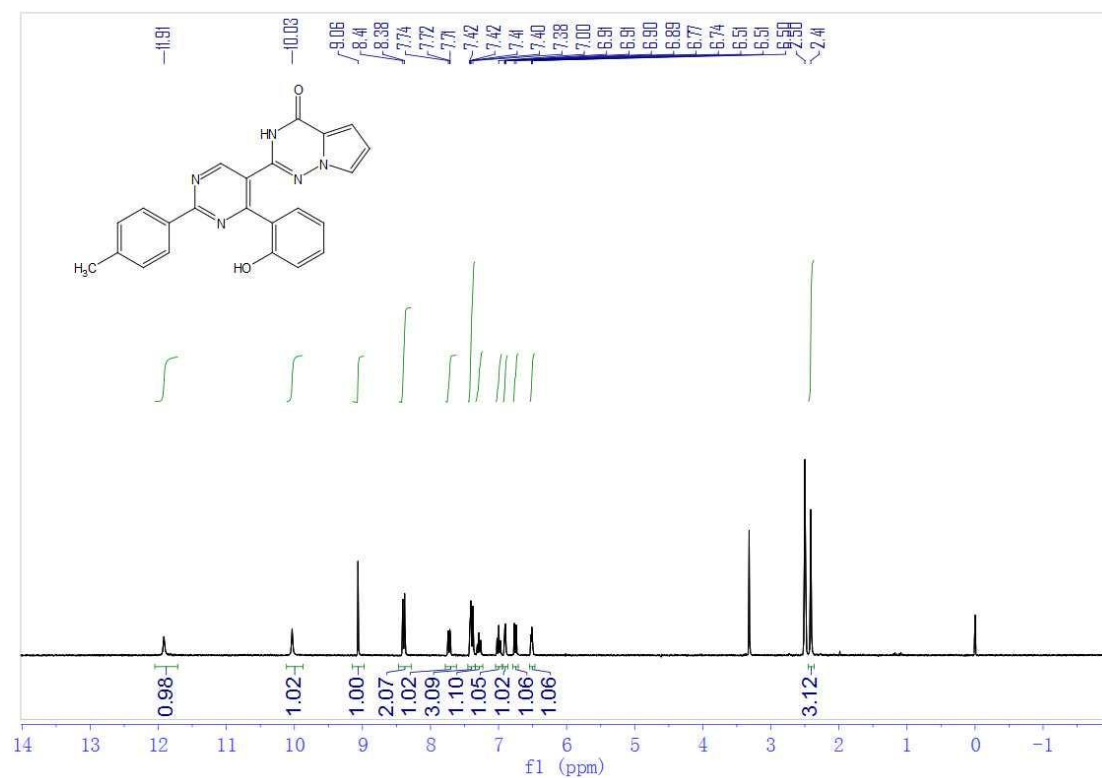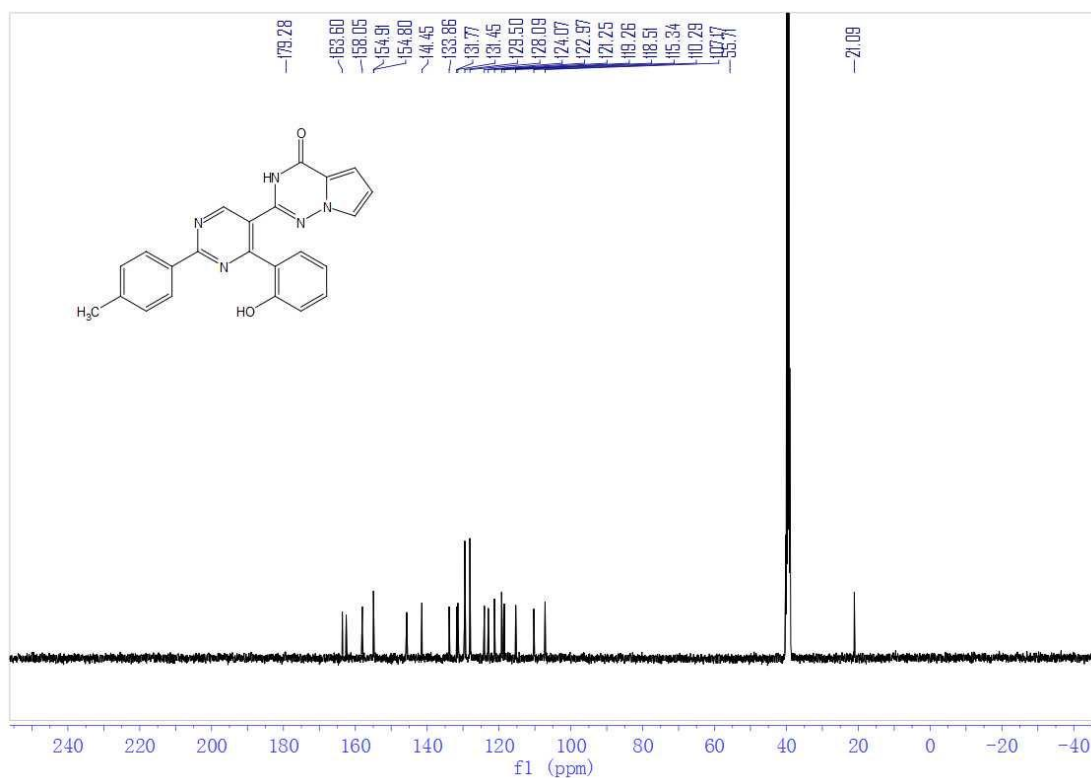

D2

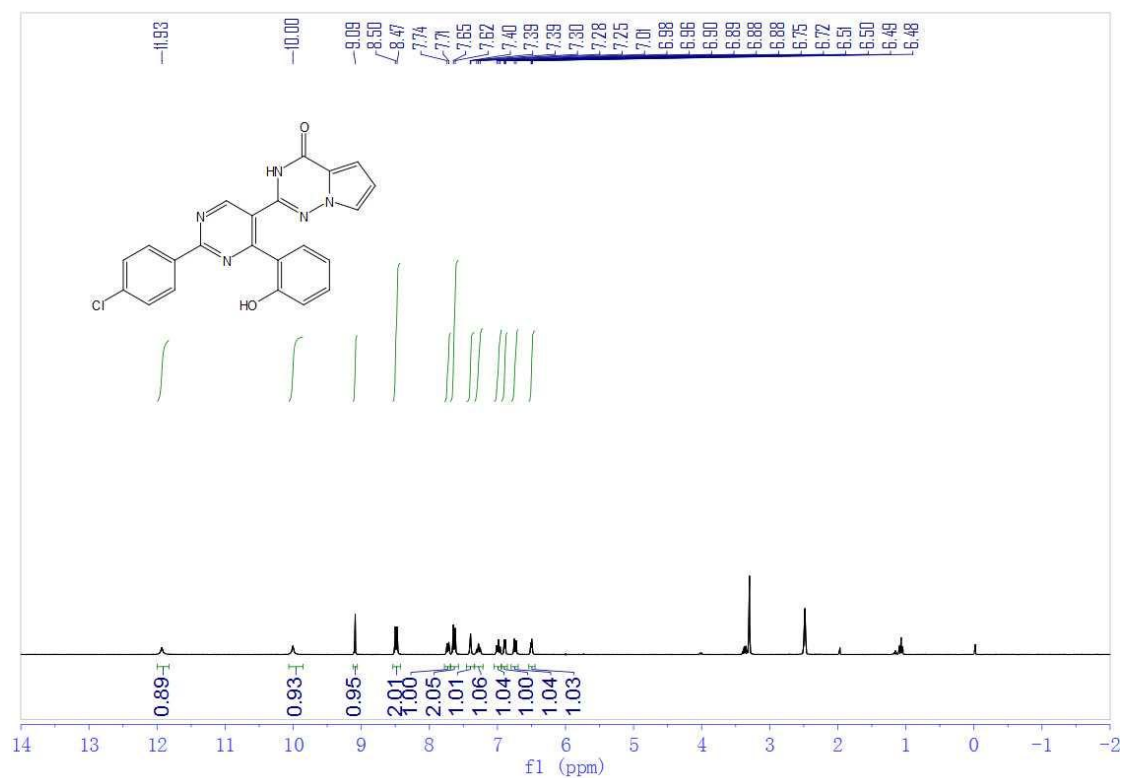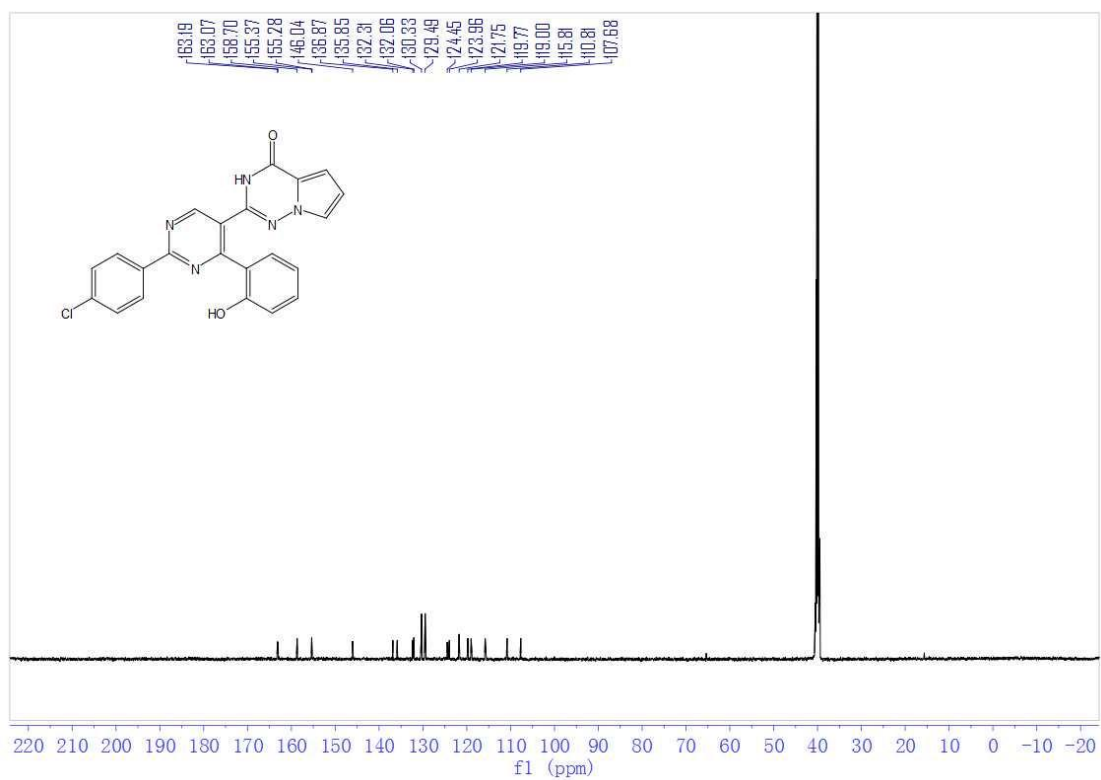

D3

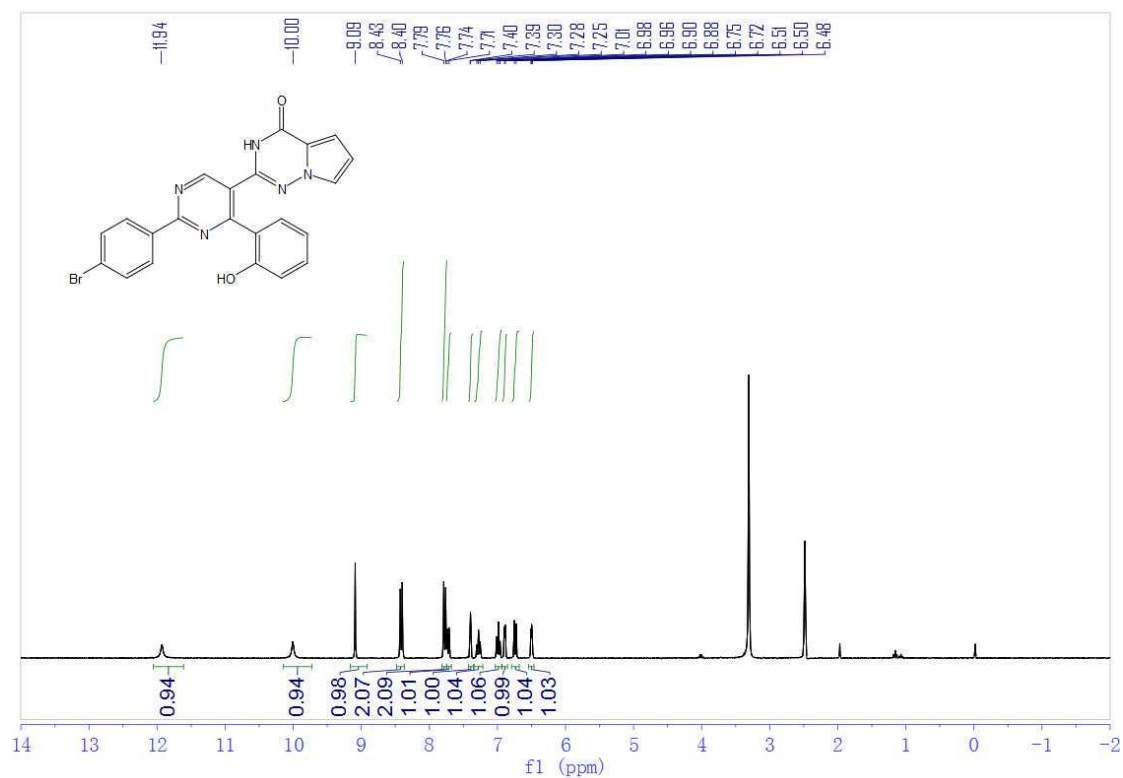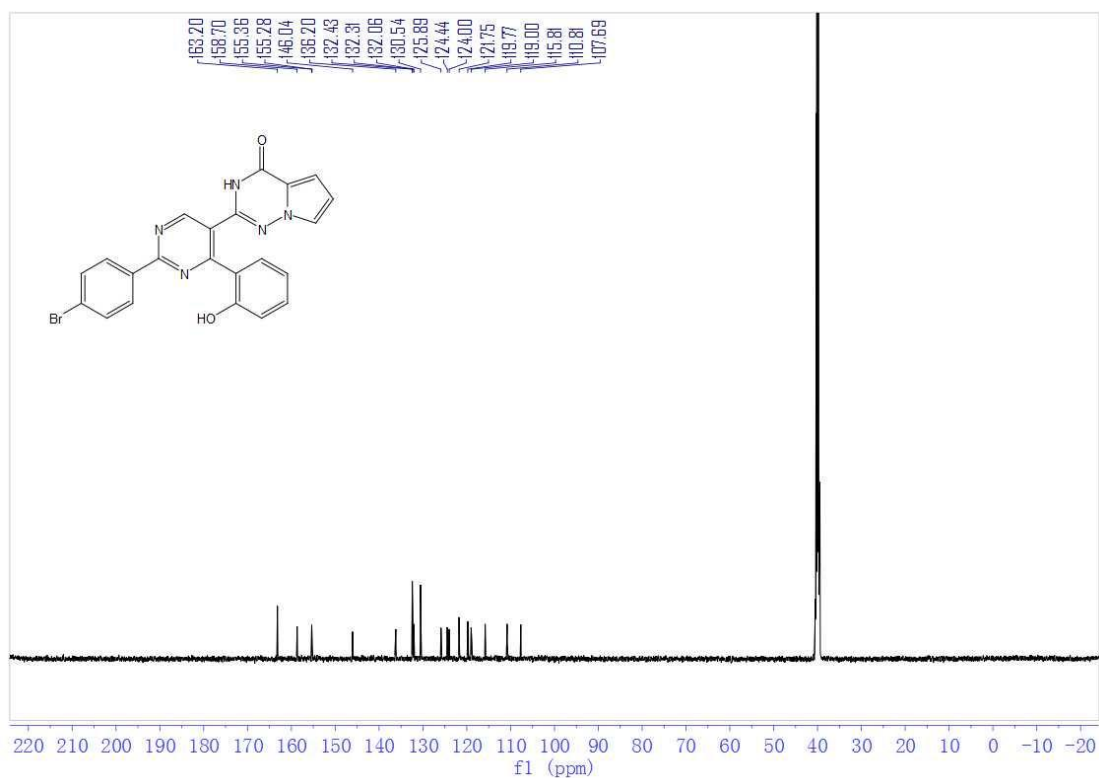

D4



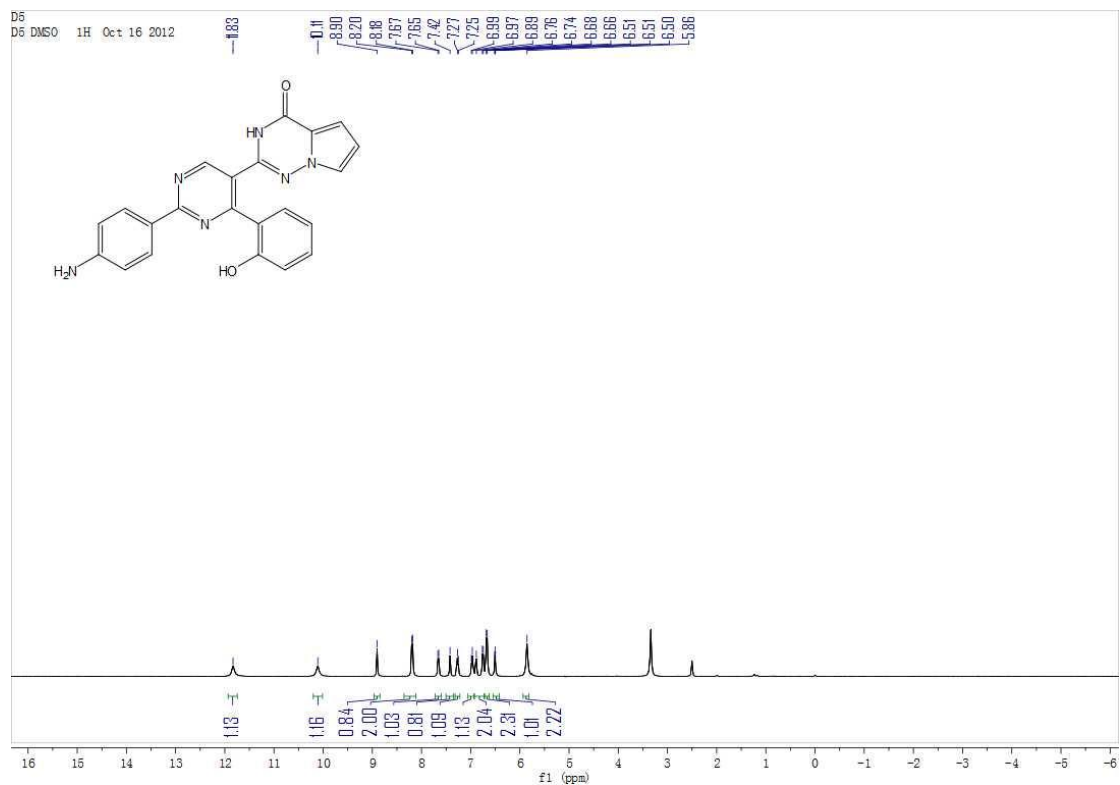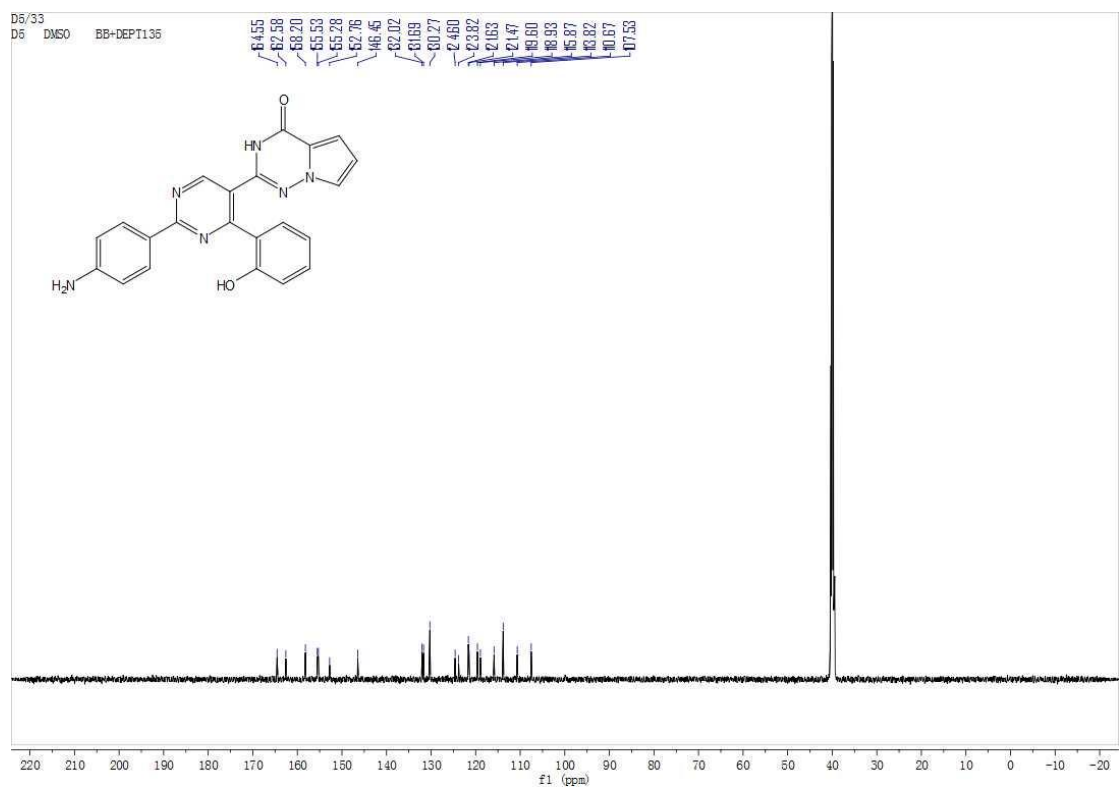

D5

S25

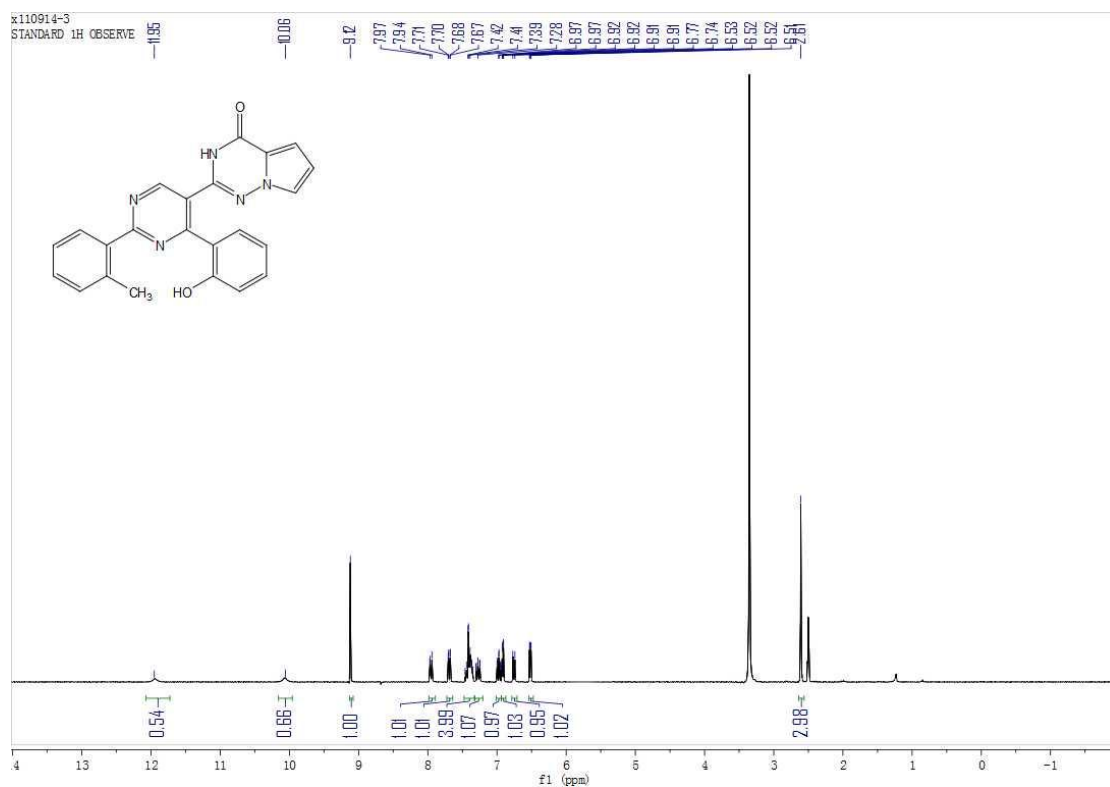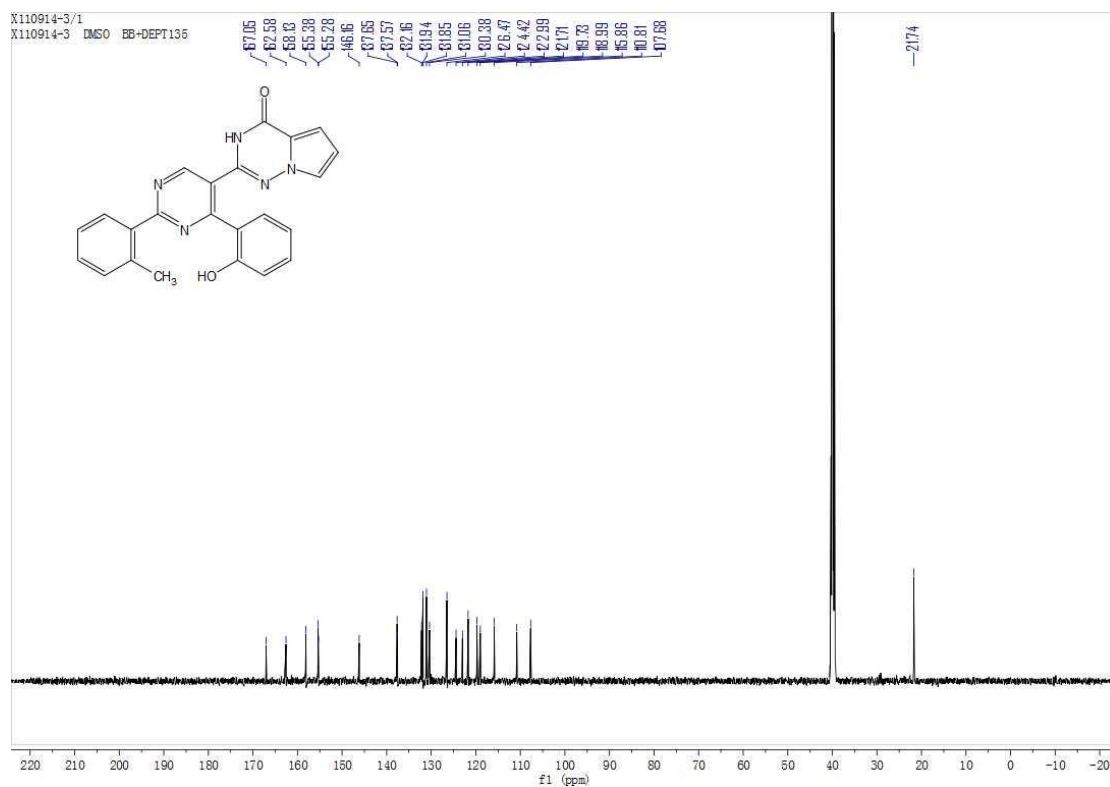

D6

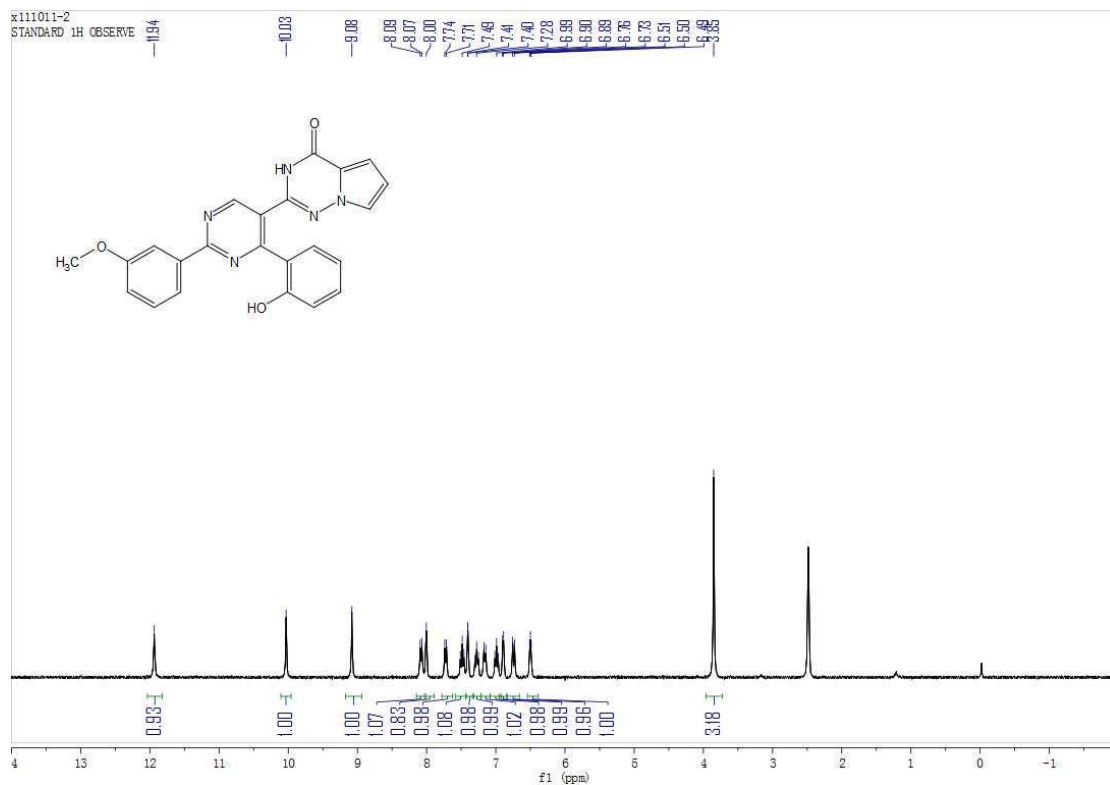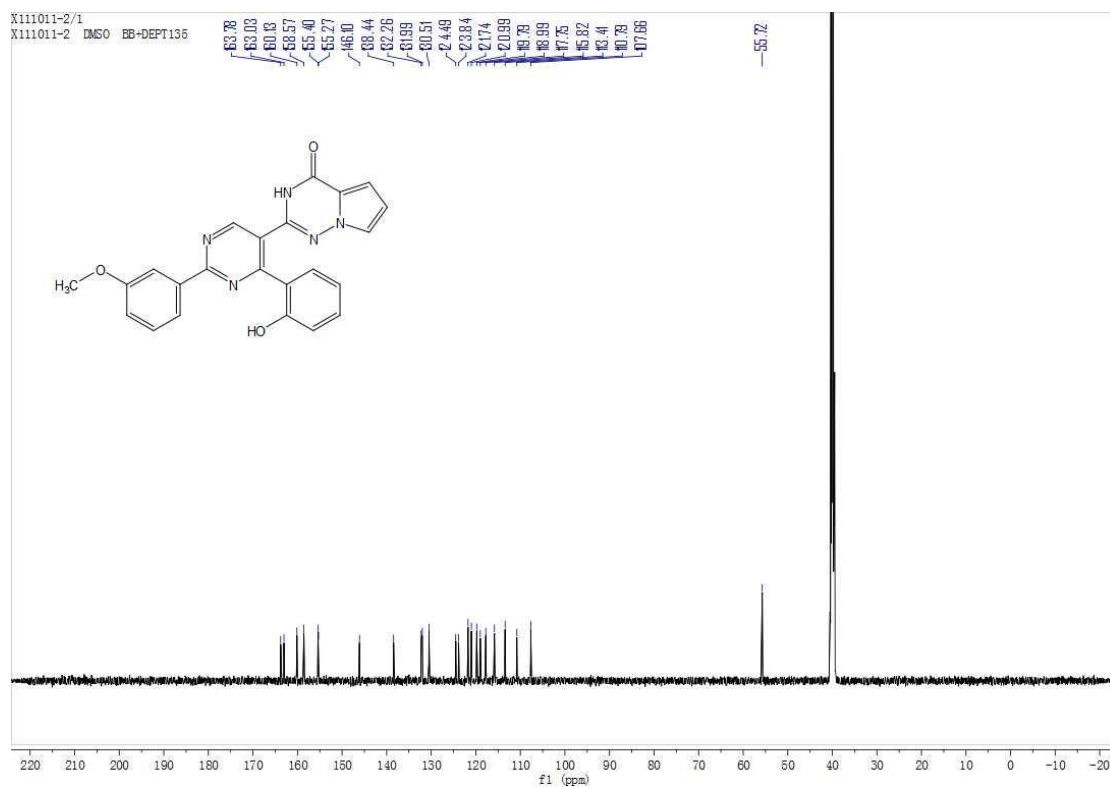

D7

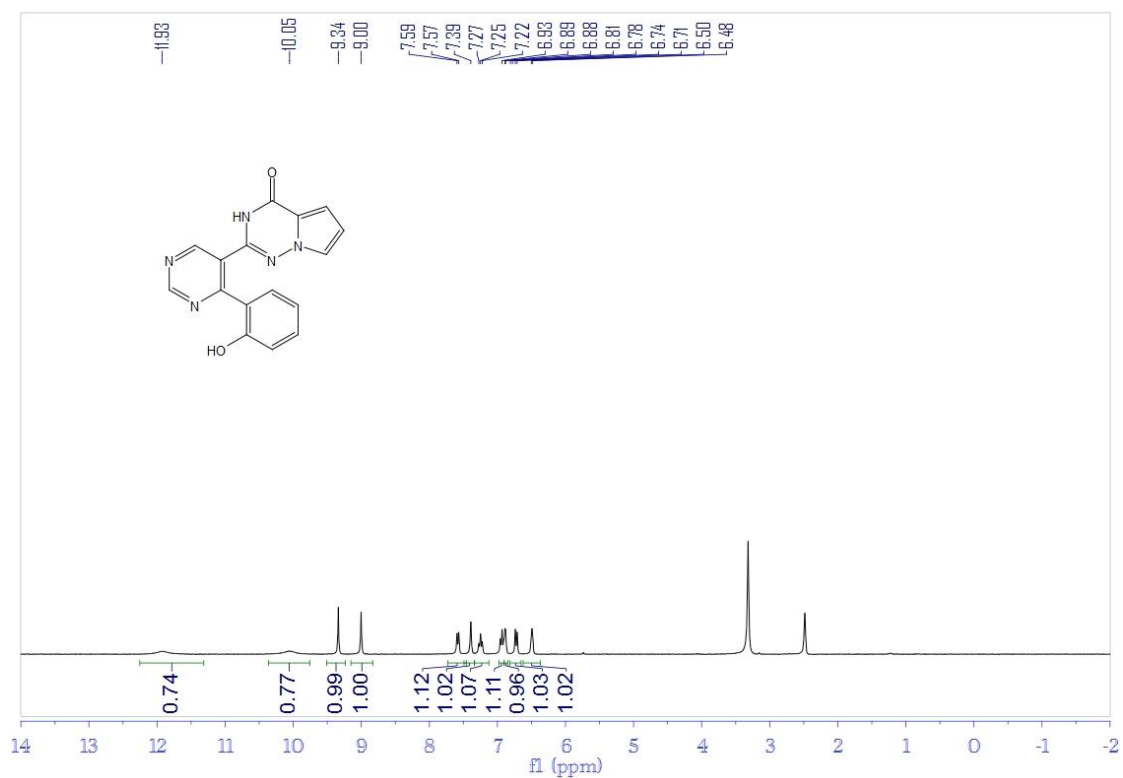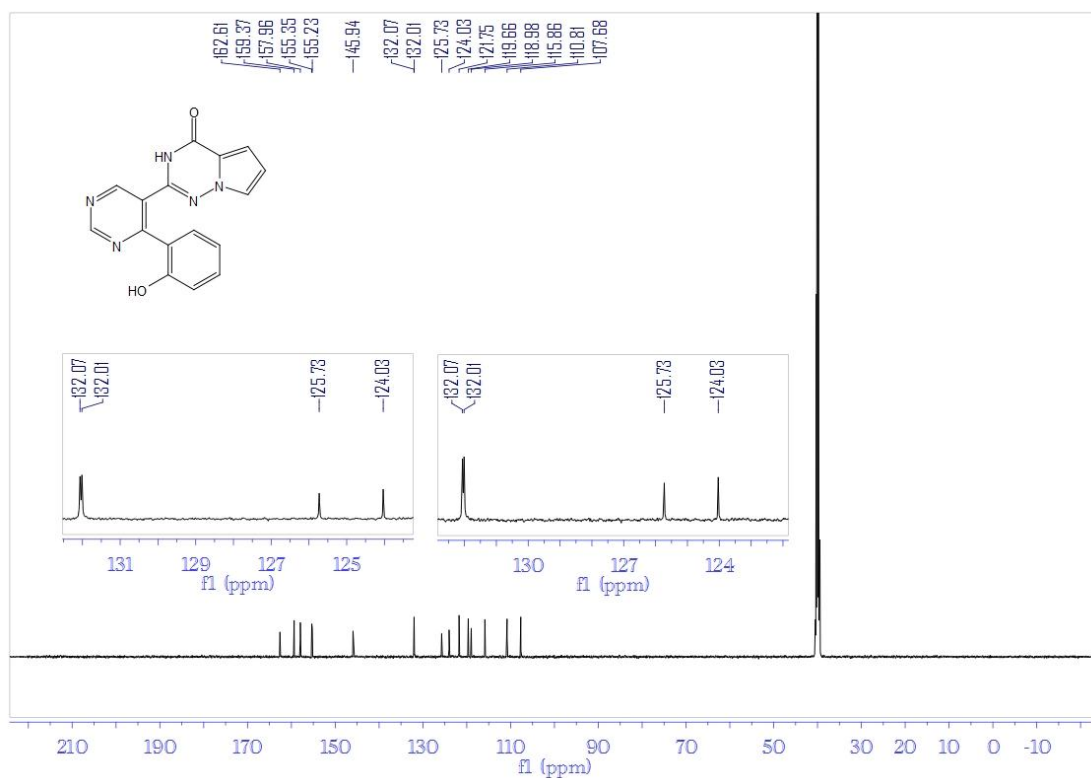

D8

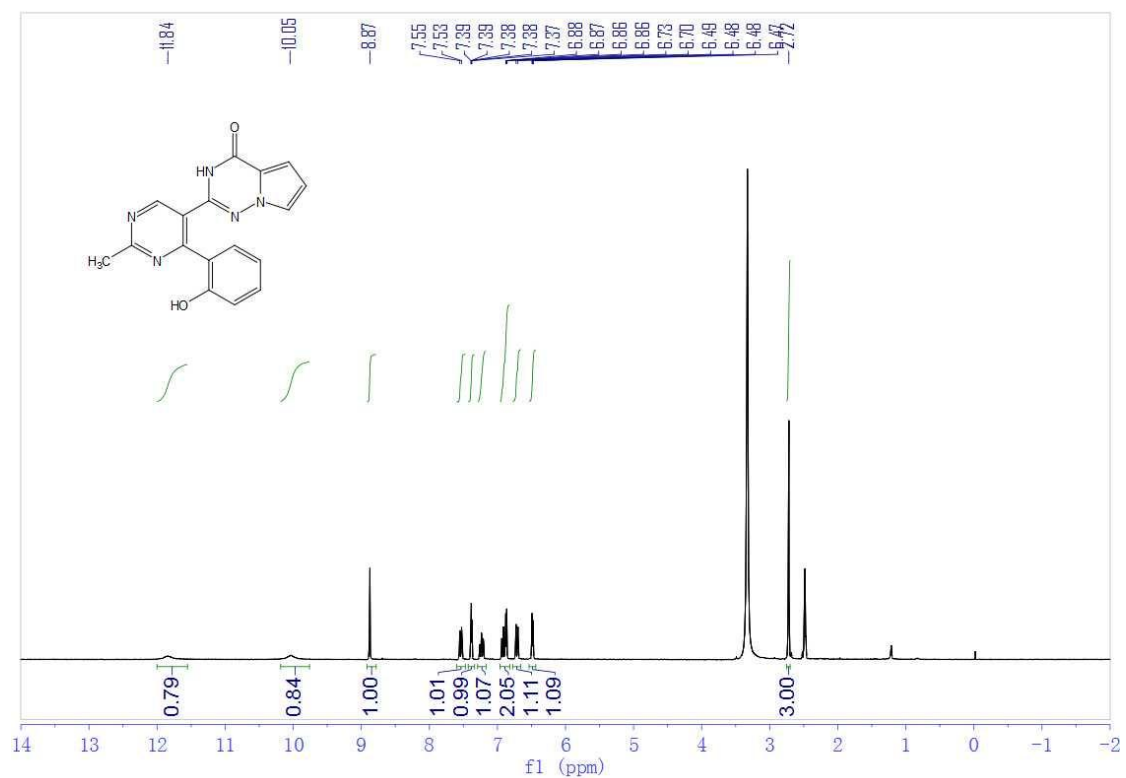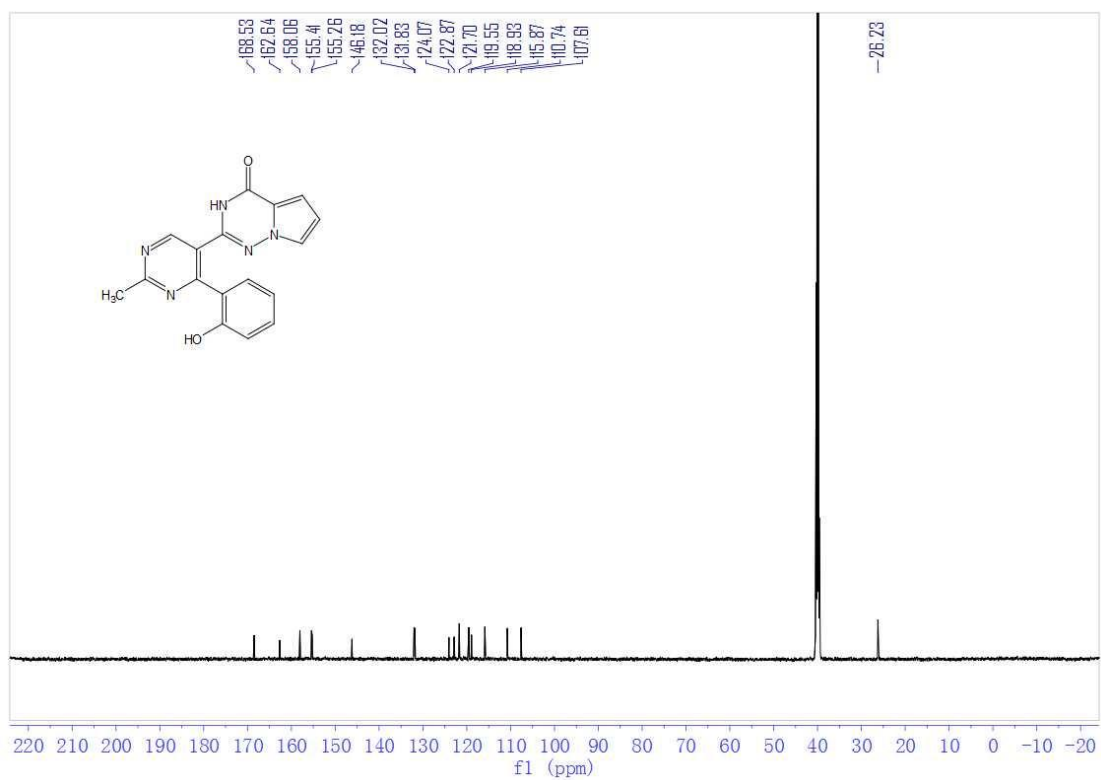

D9

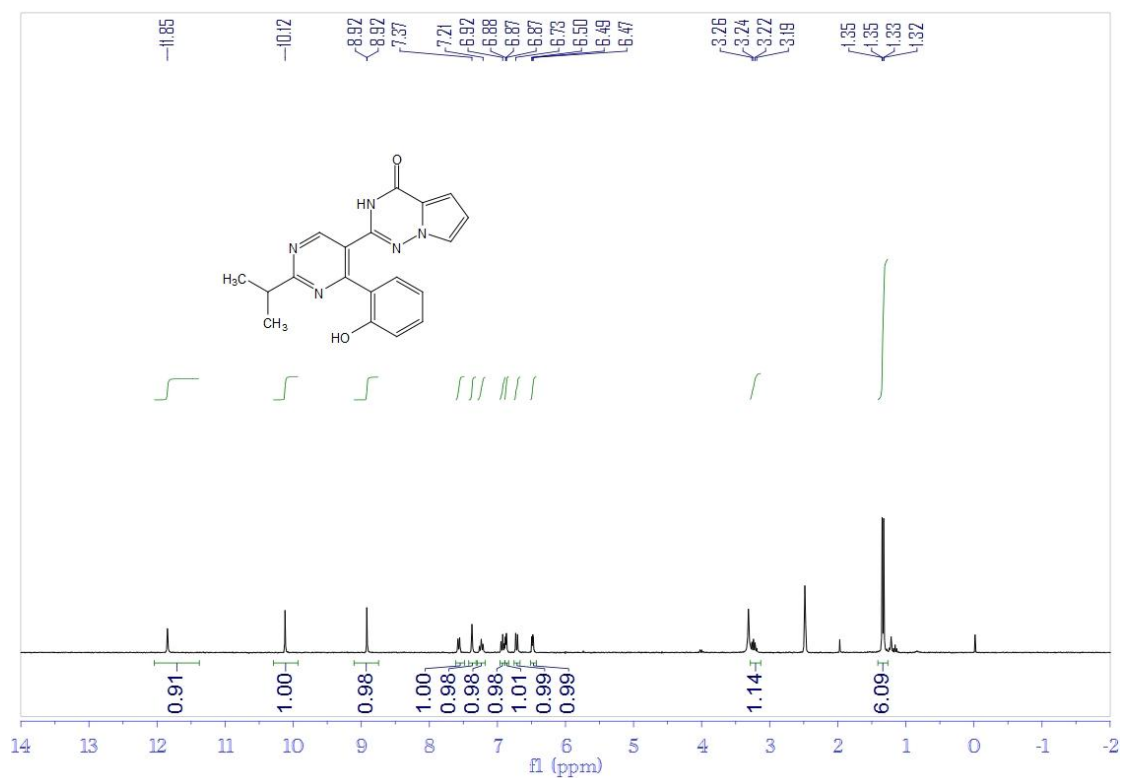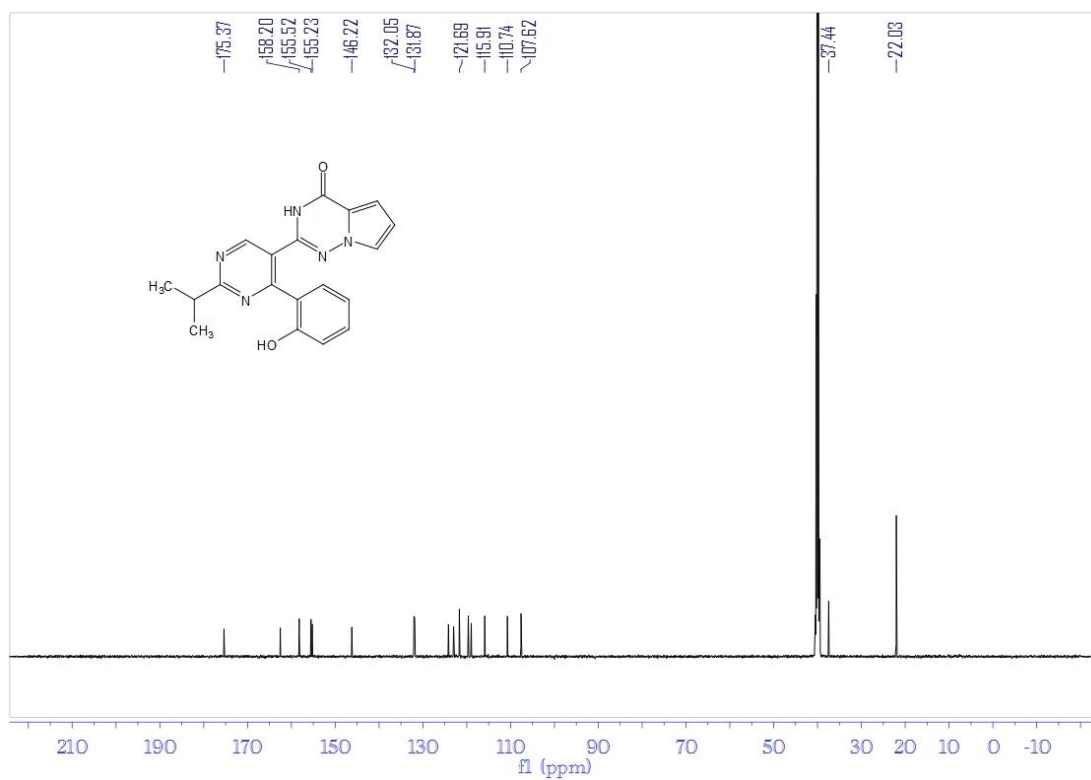

D10

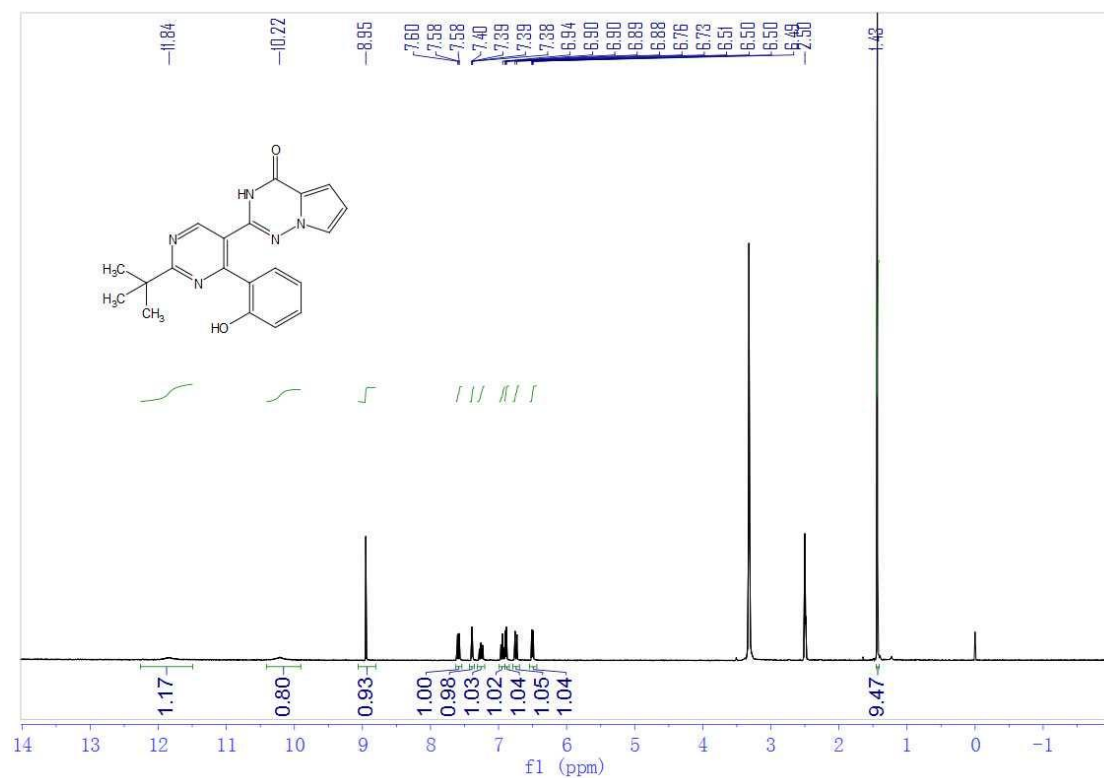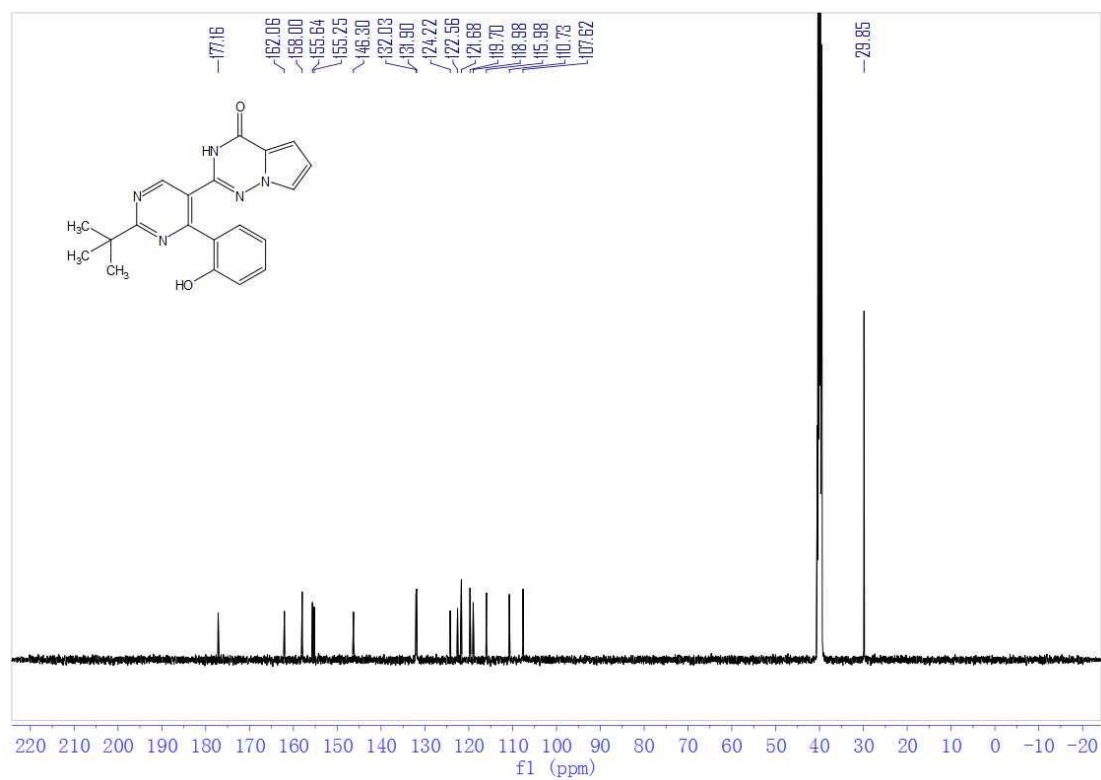

D11

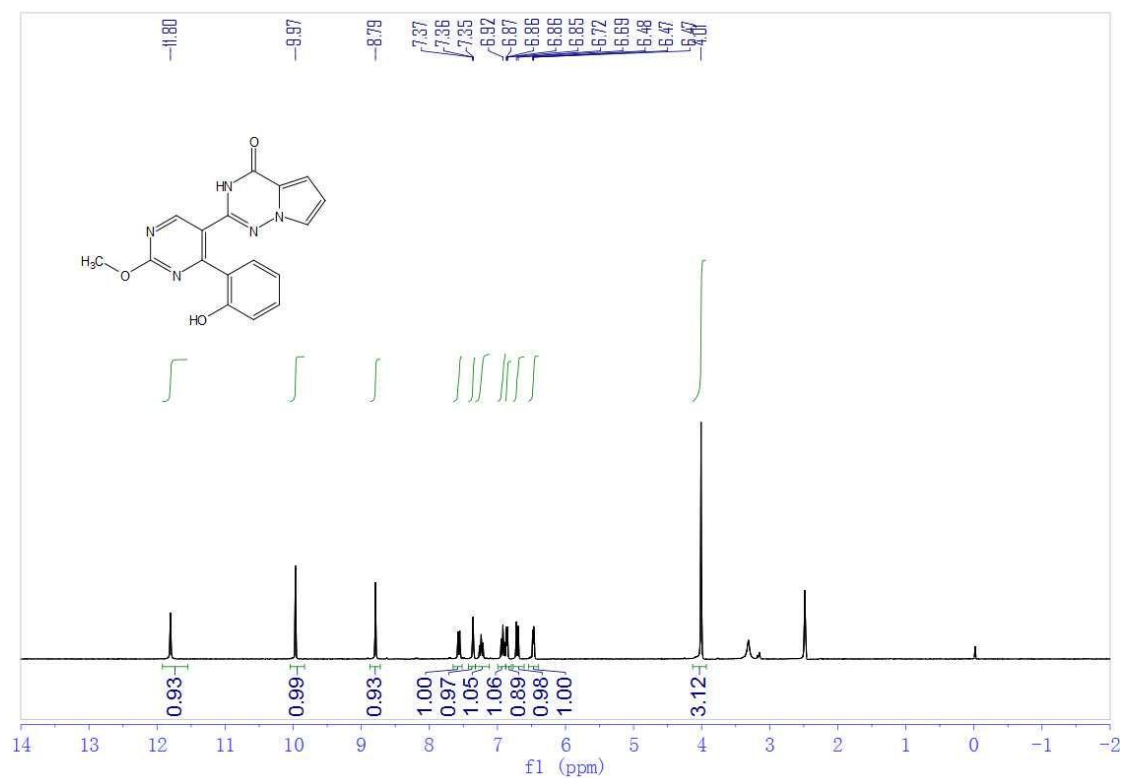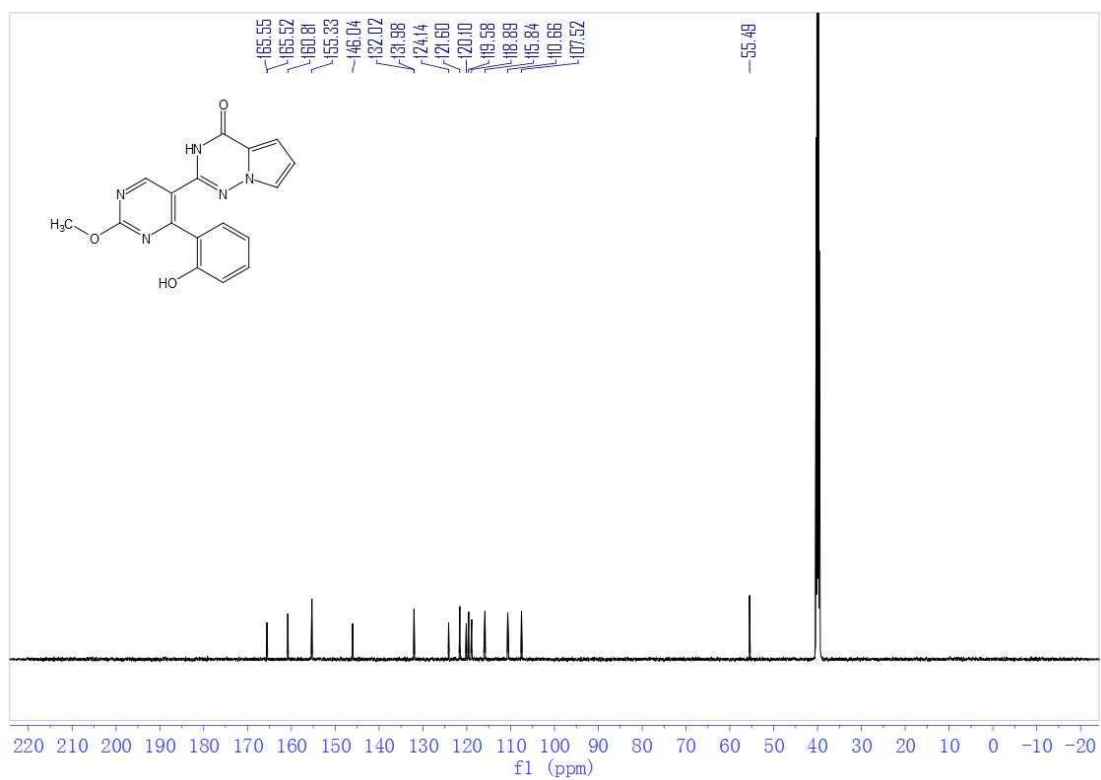

D12



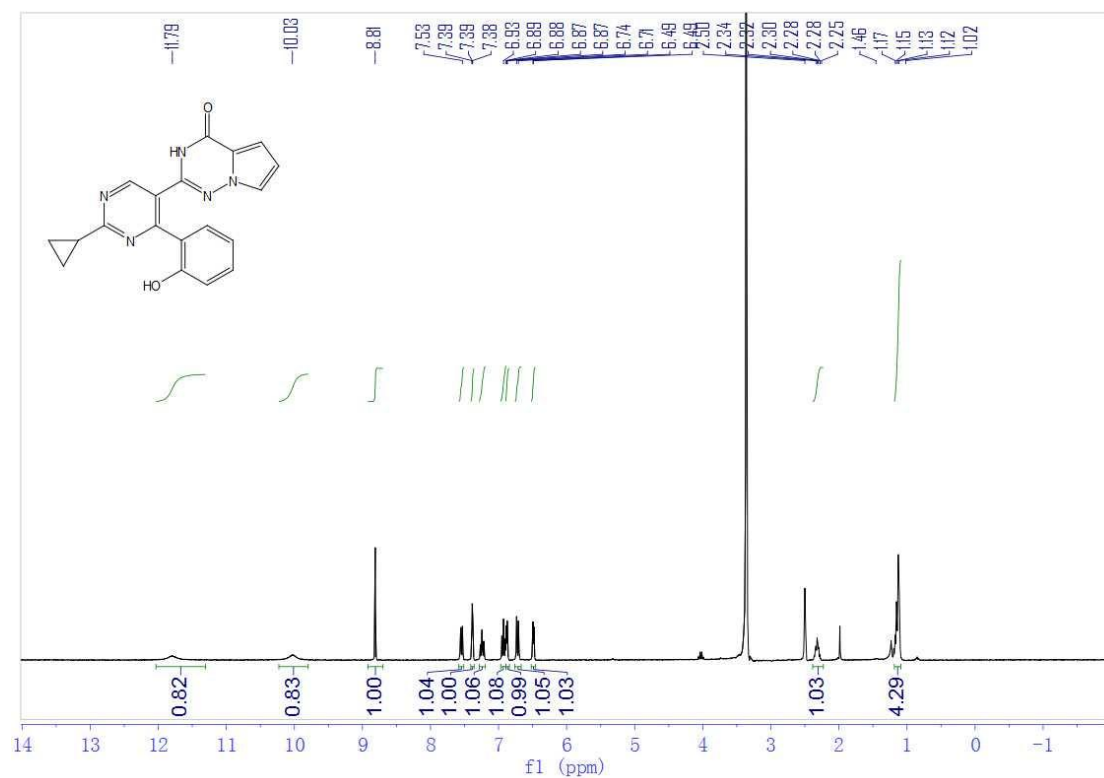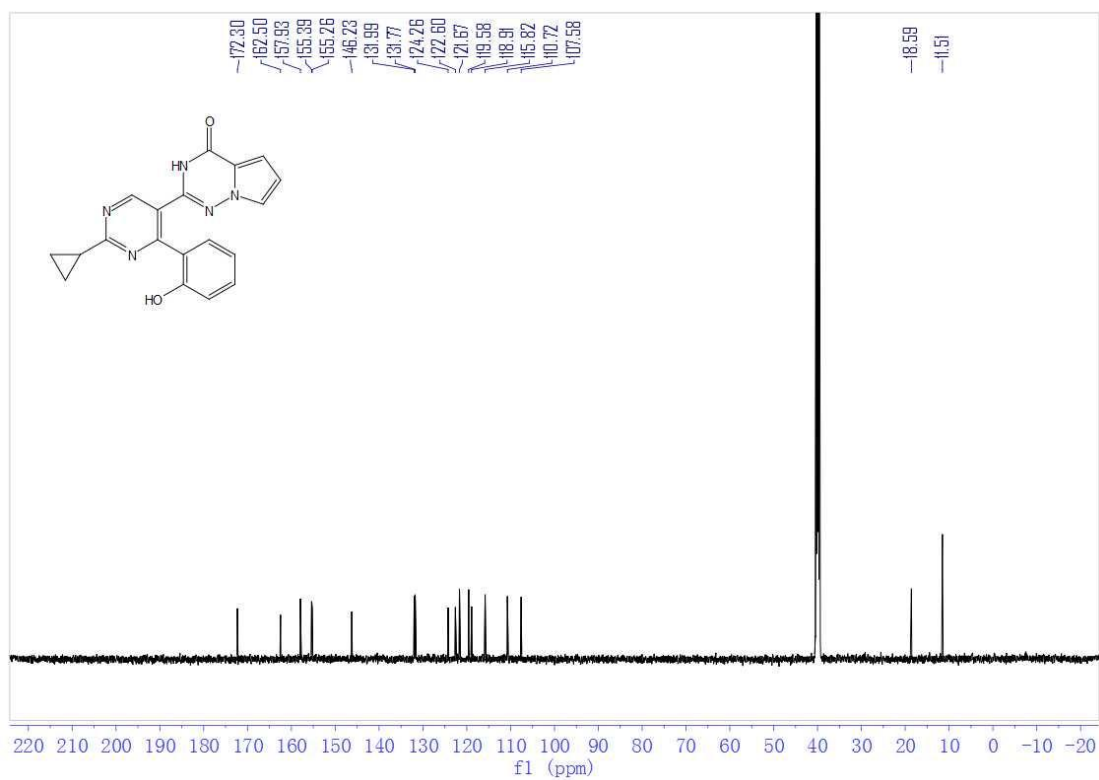

D13

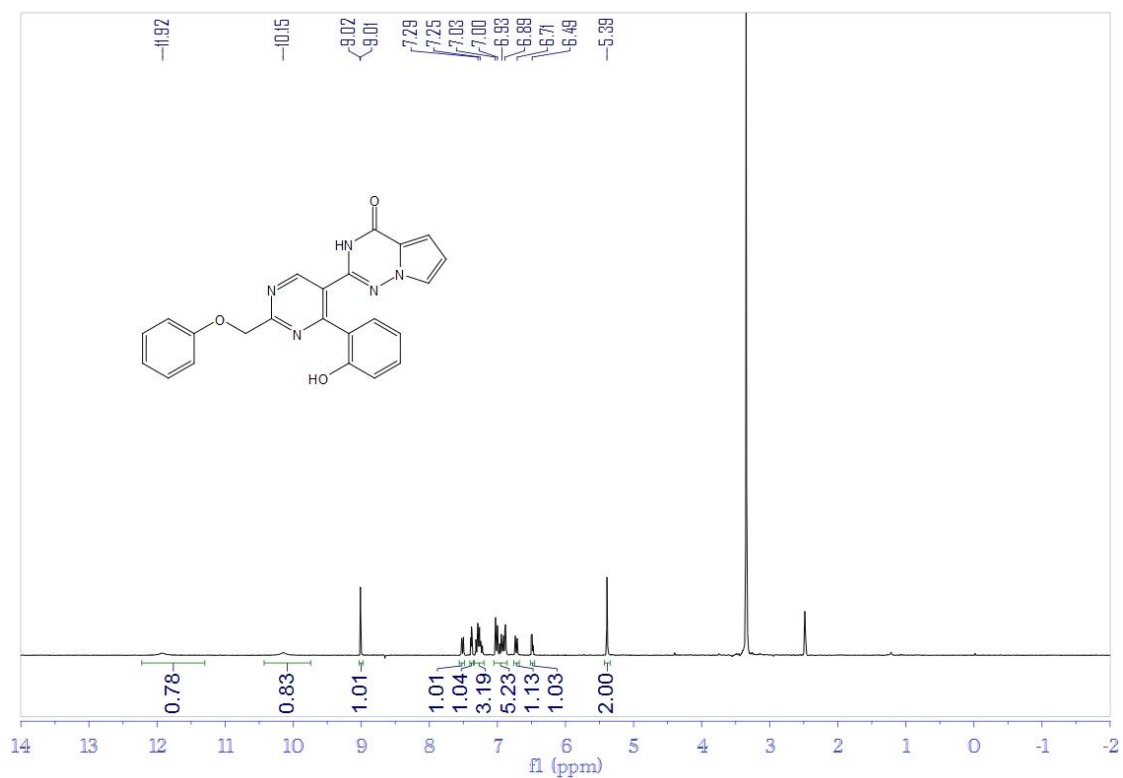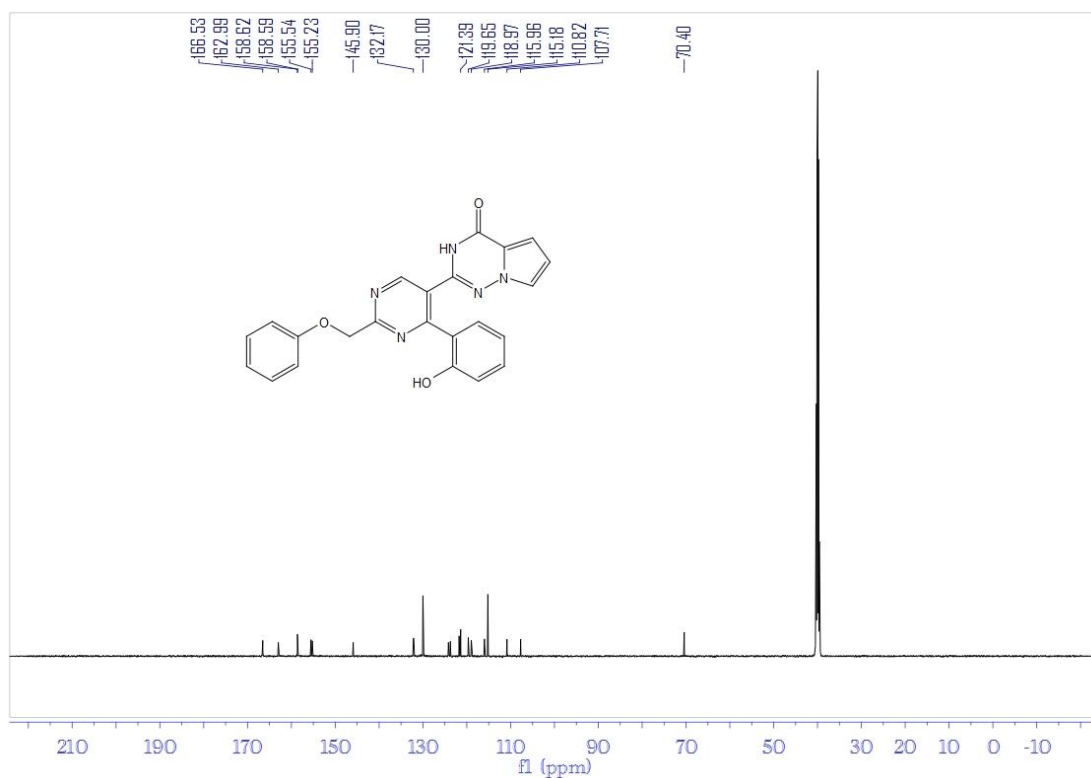

**D14**

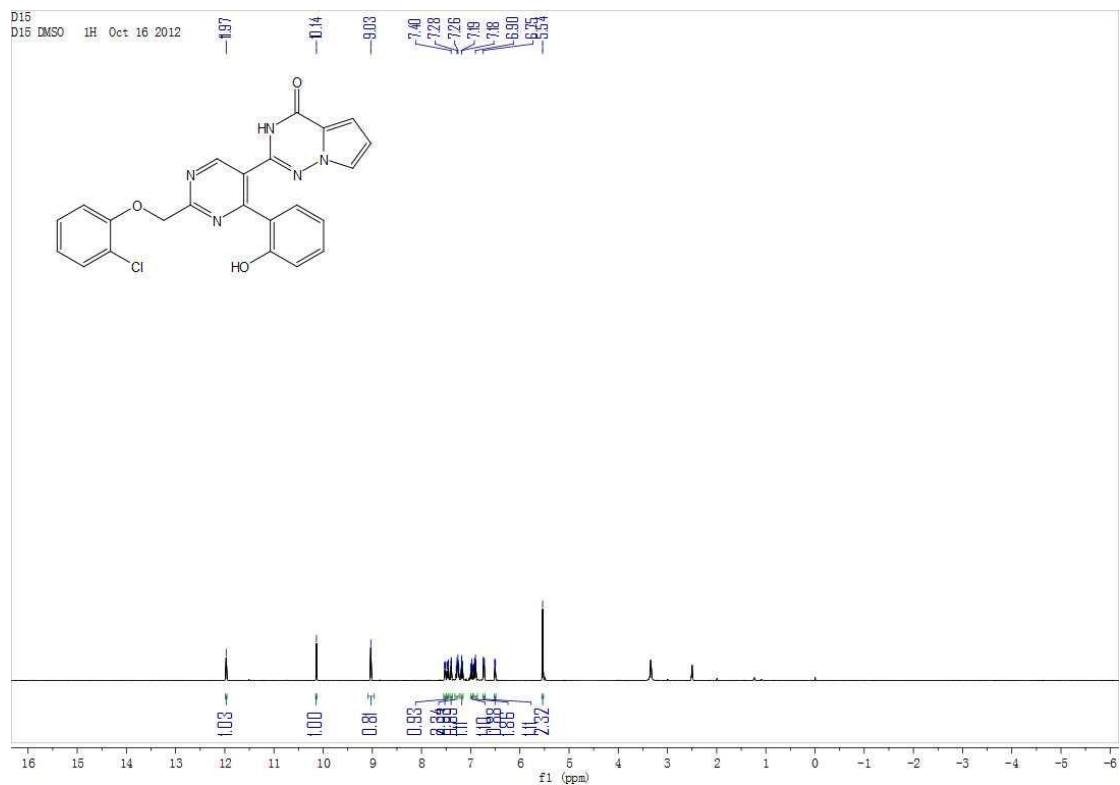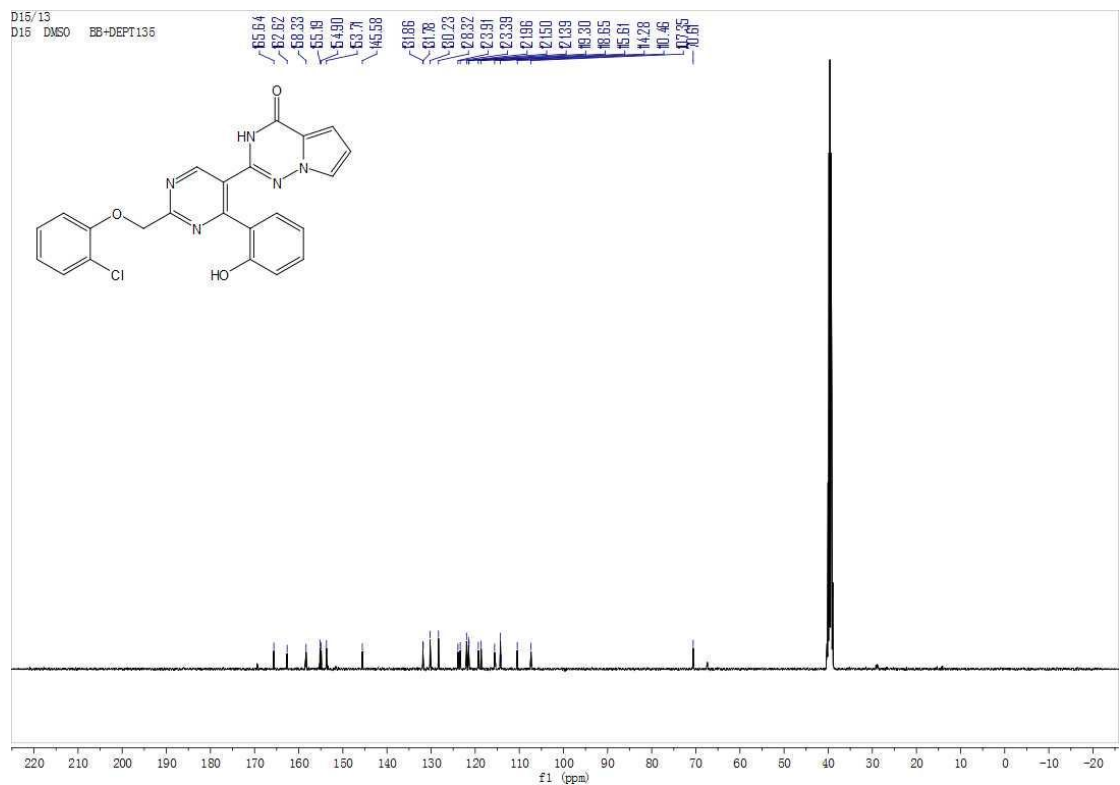

D15

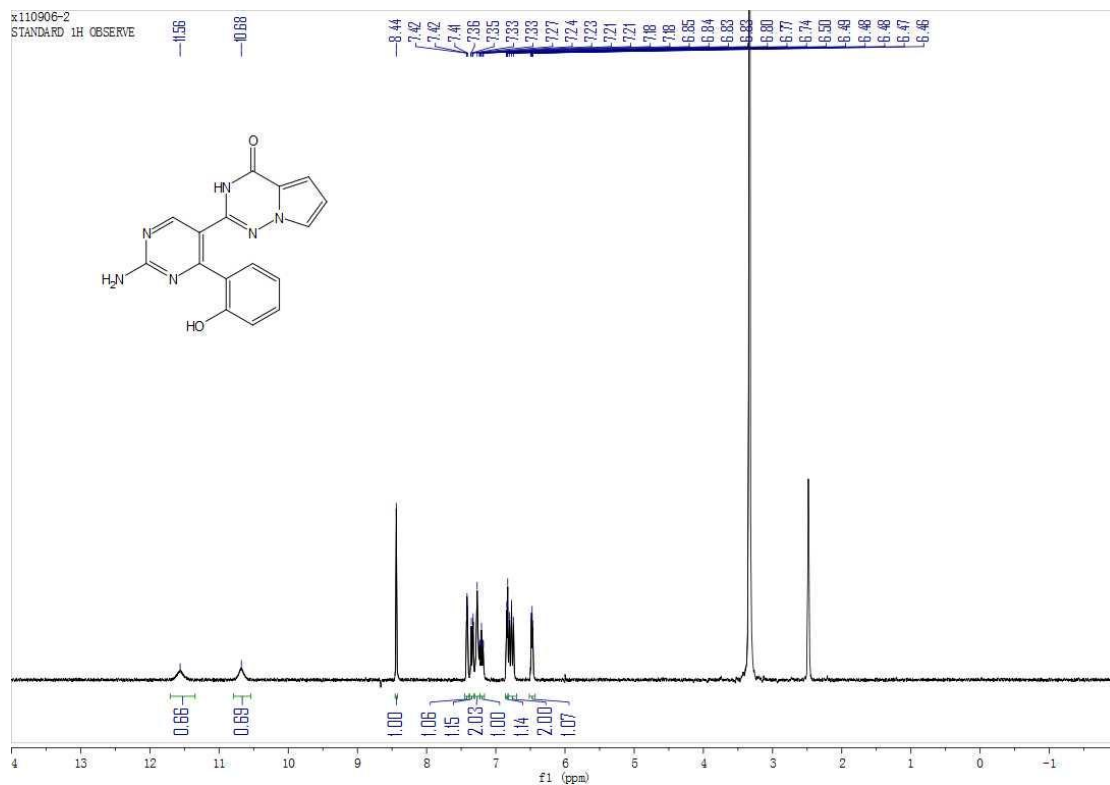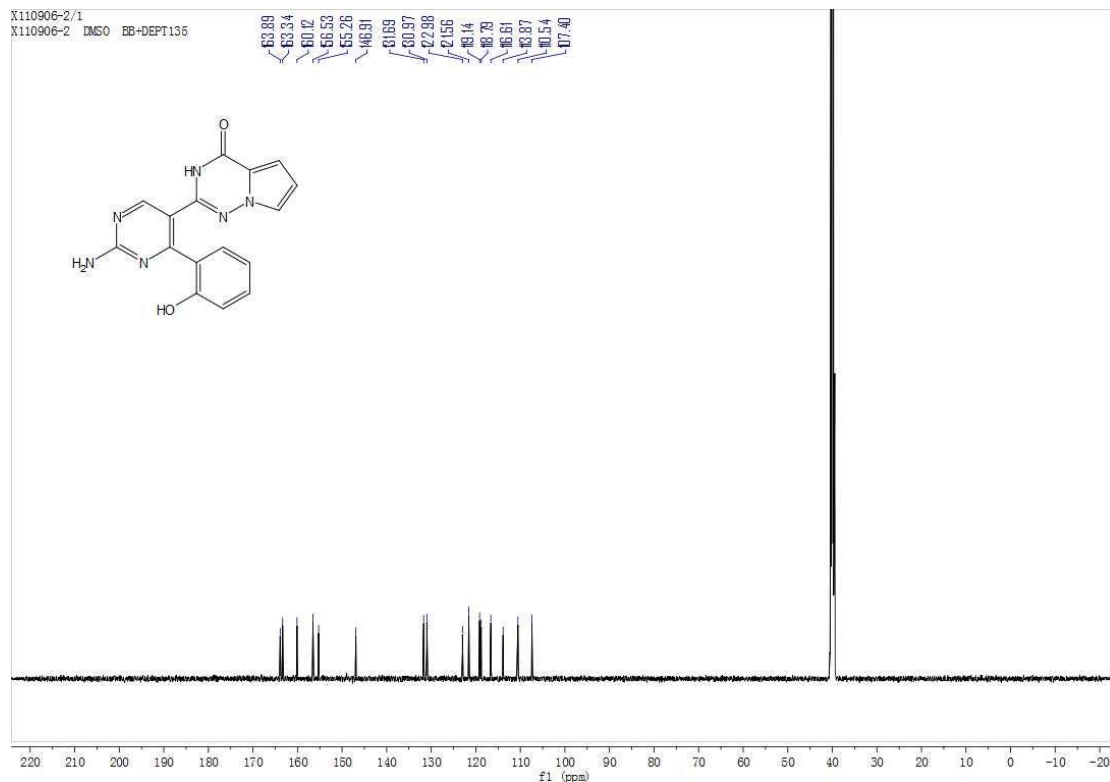

D16

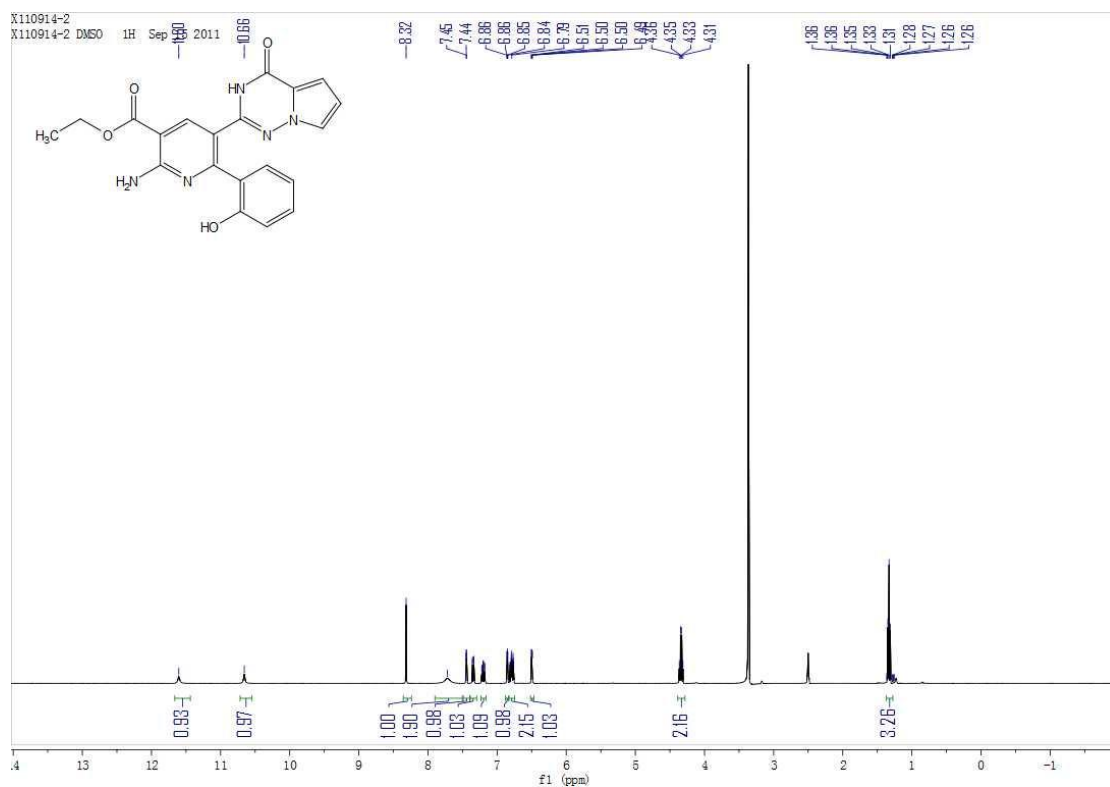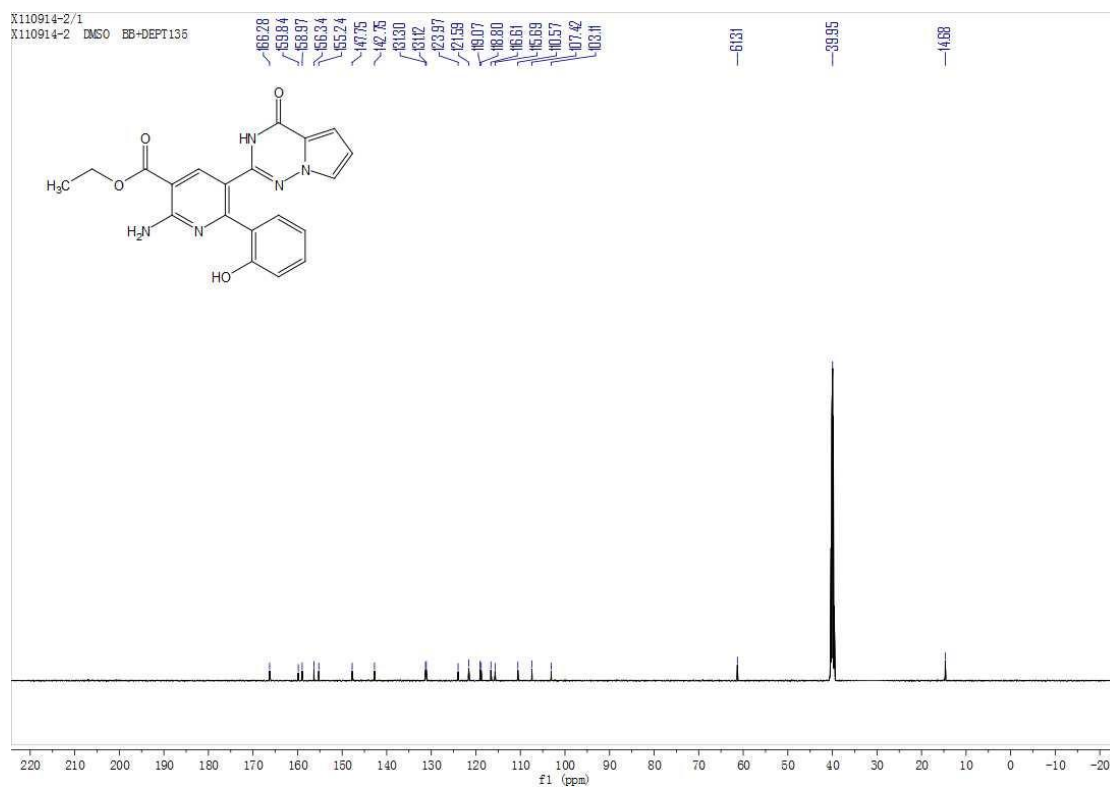

D17

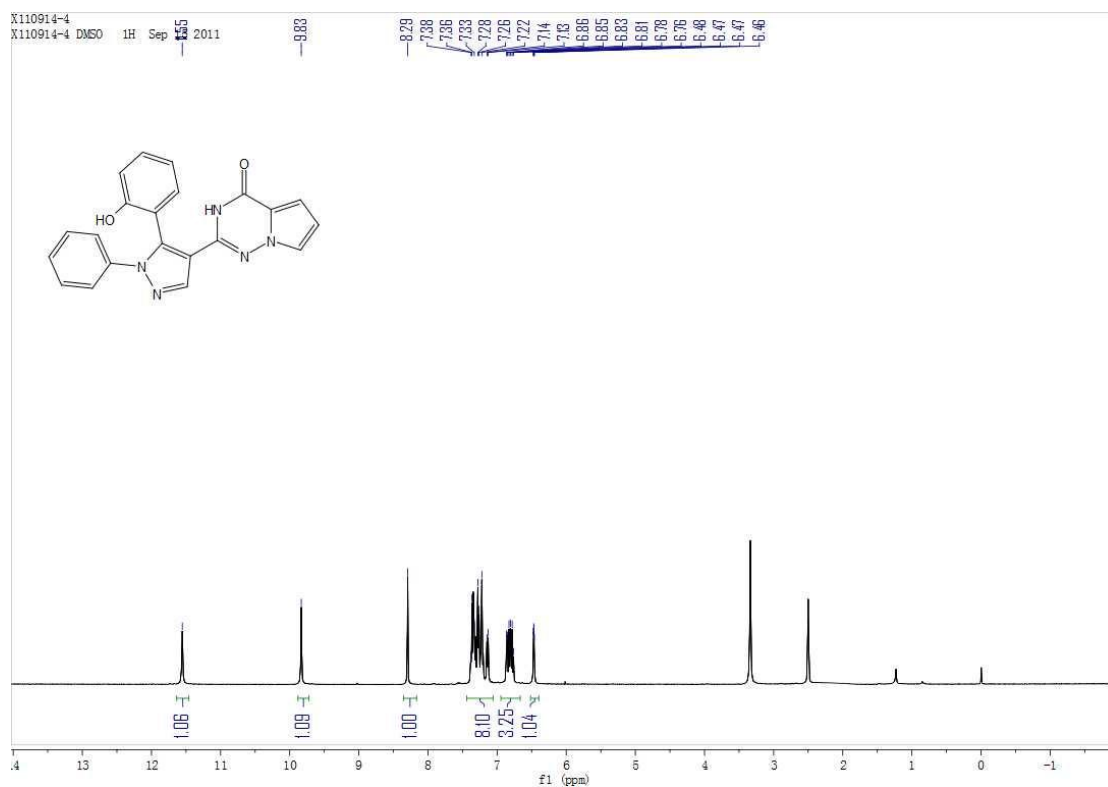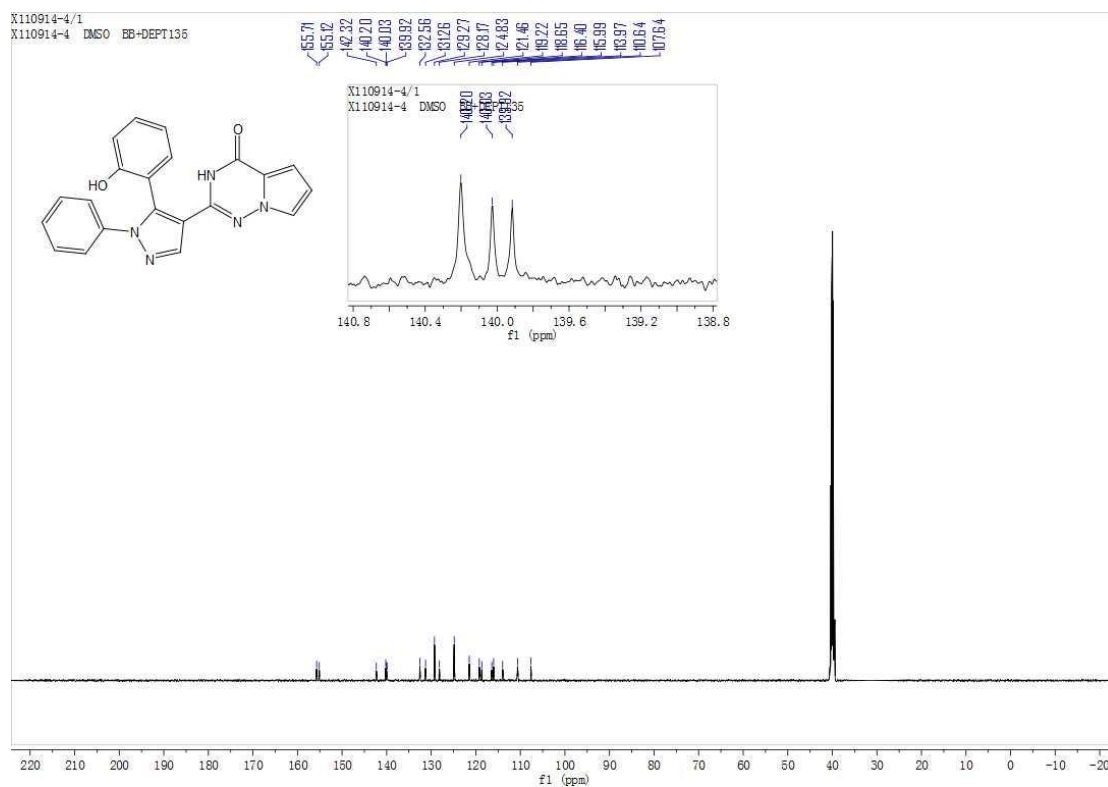

D18

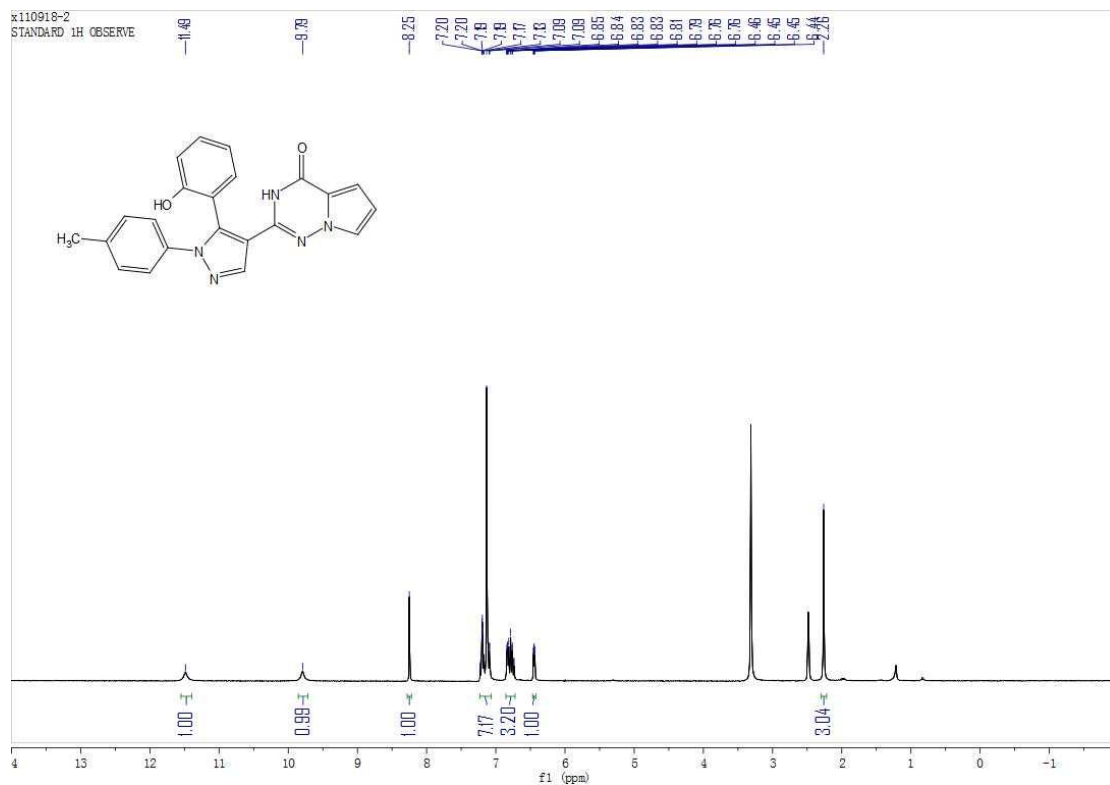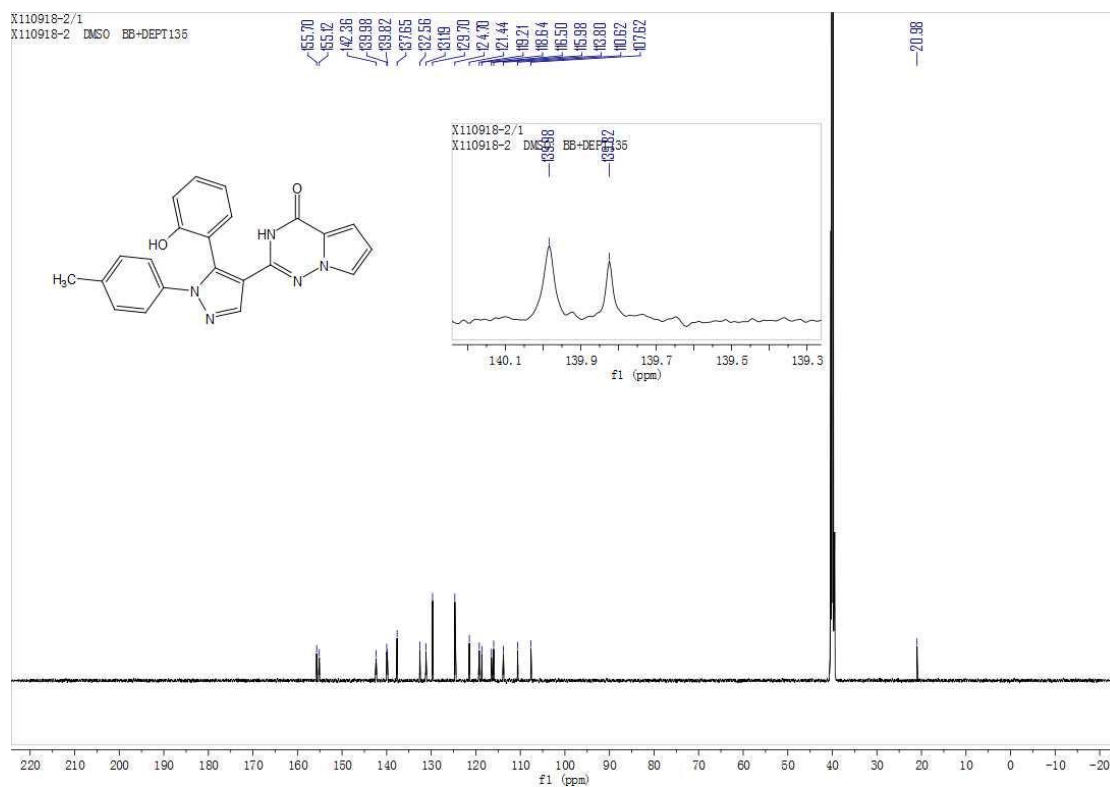

D19

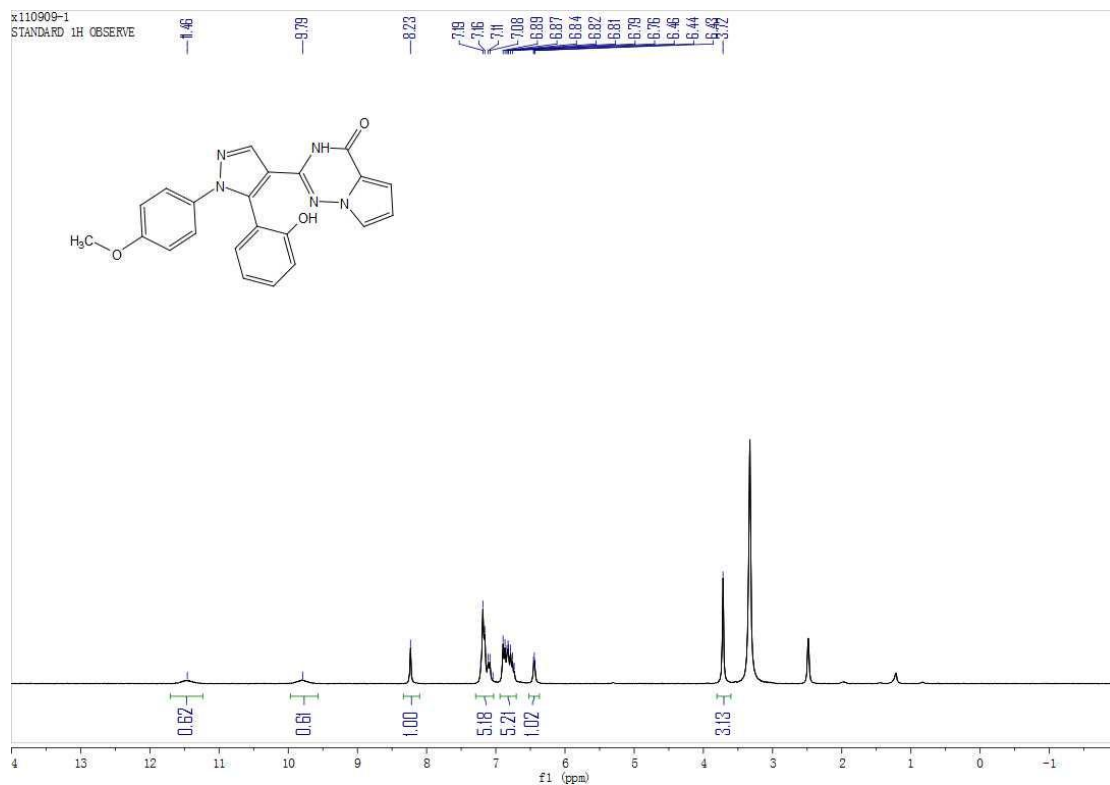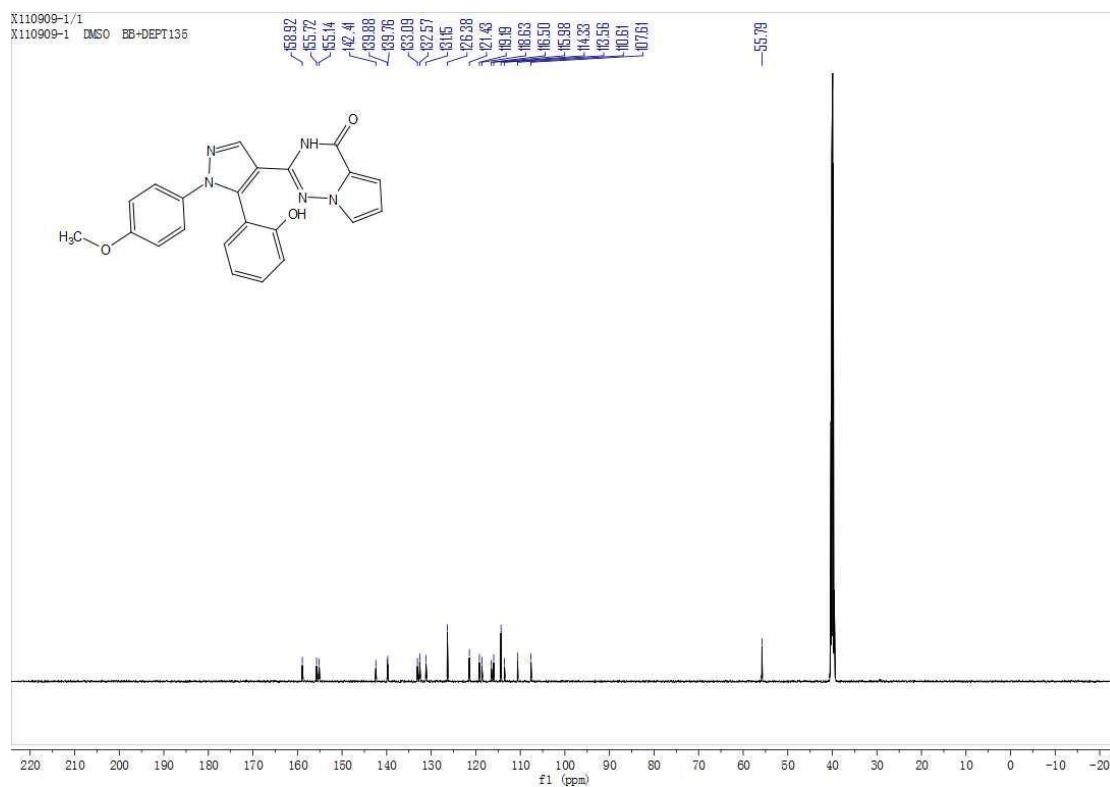

D20



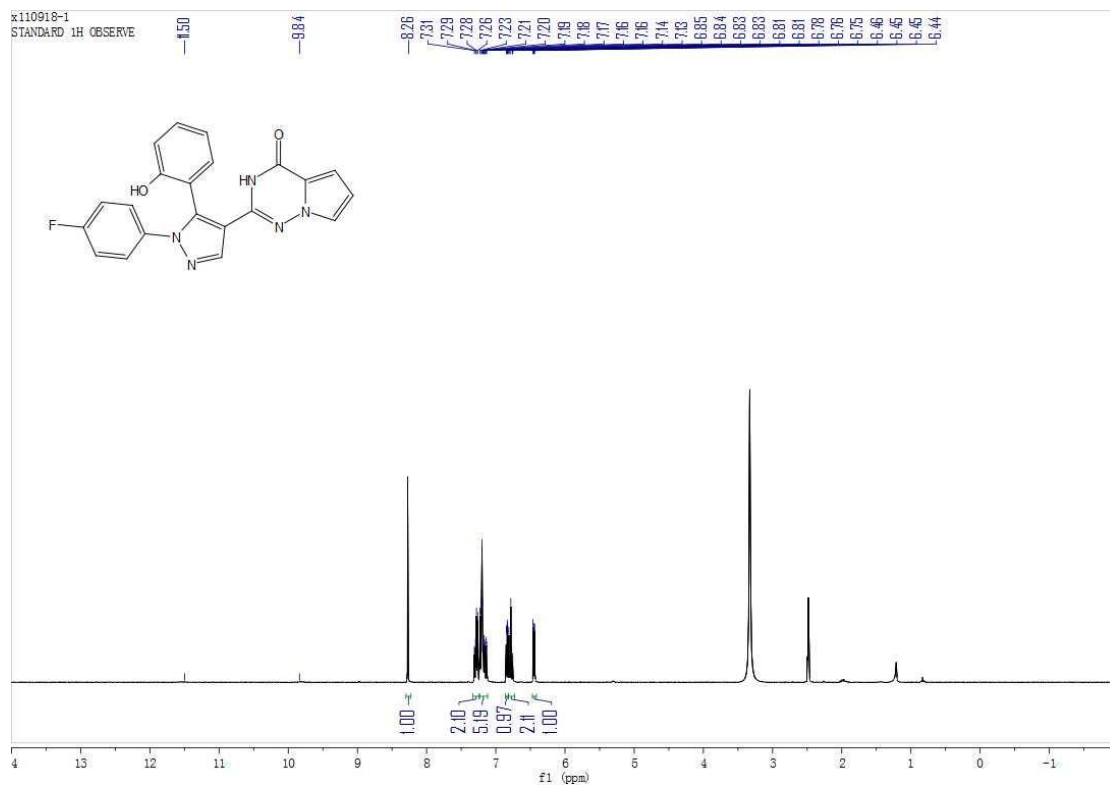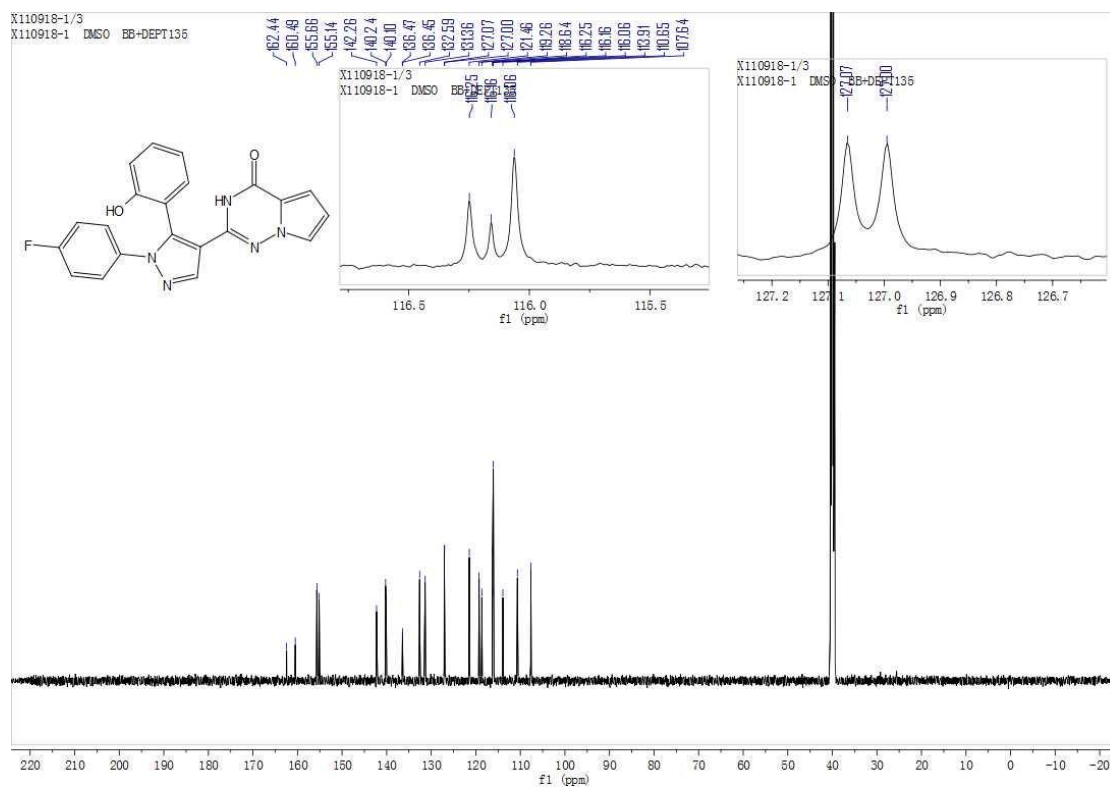

D21

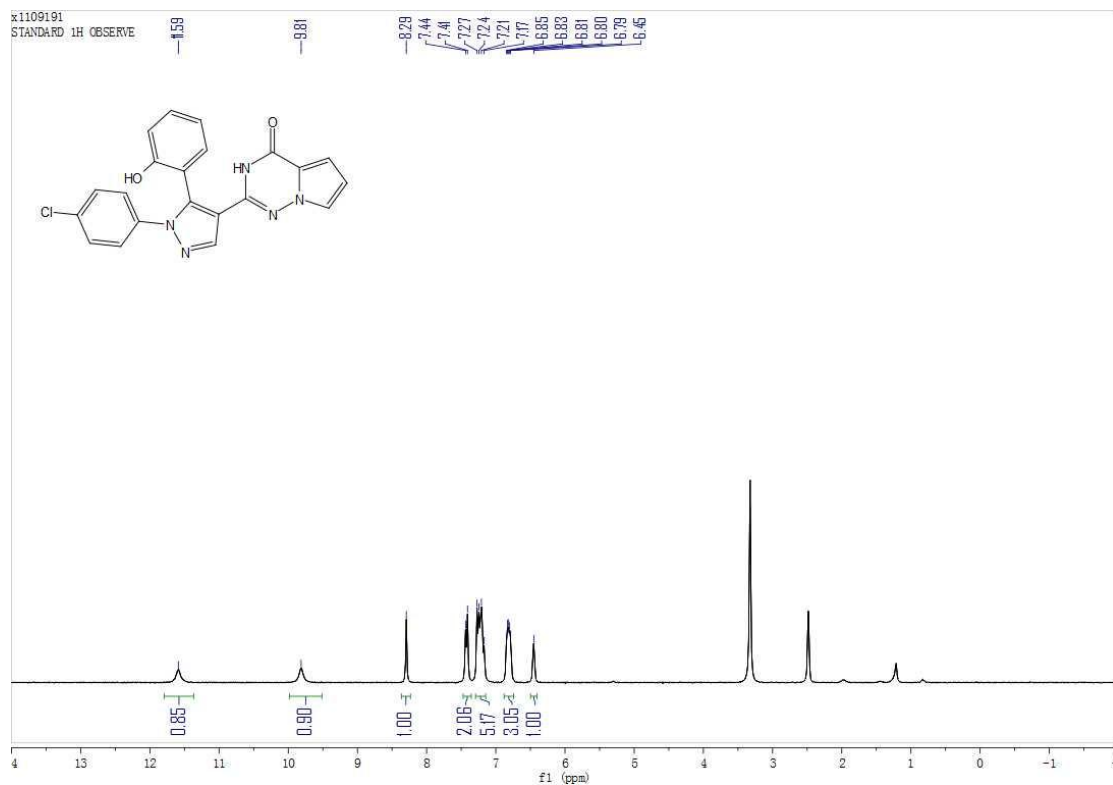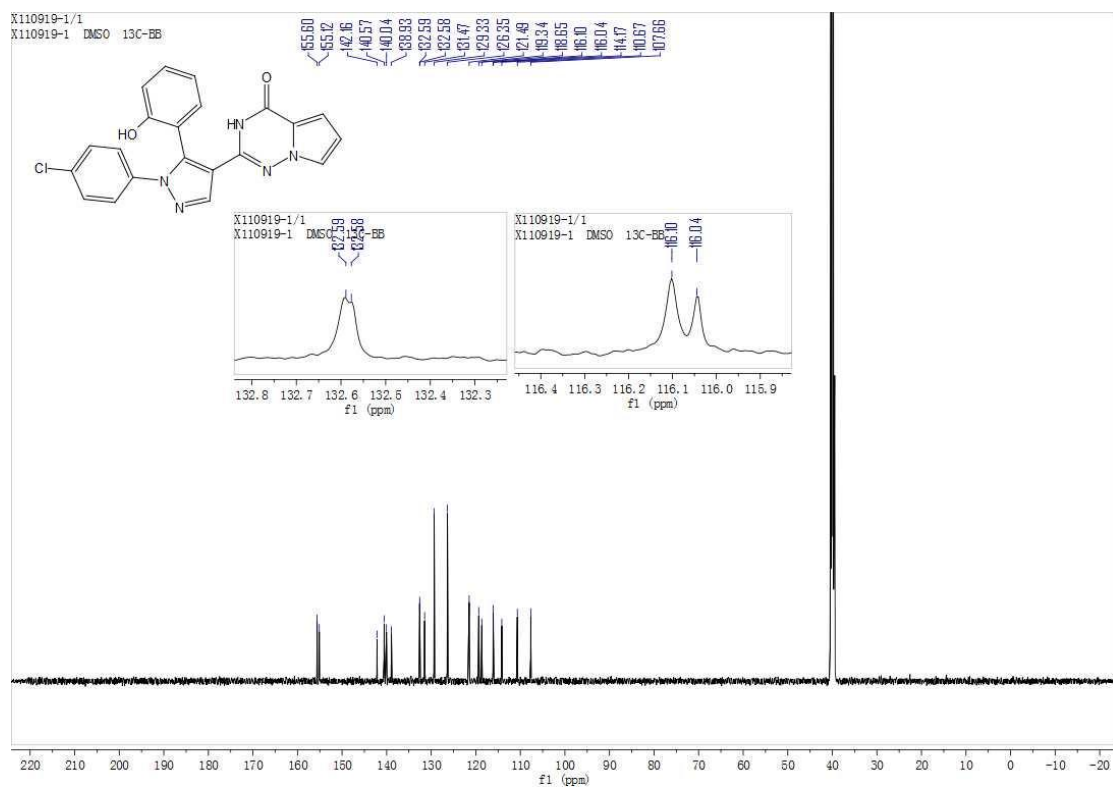

D22

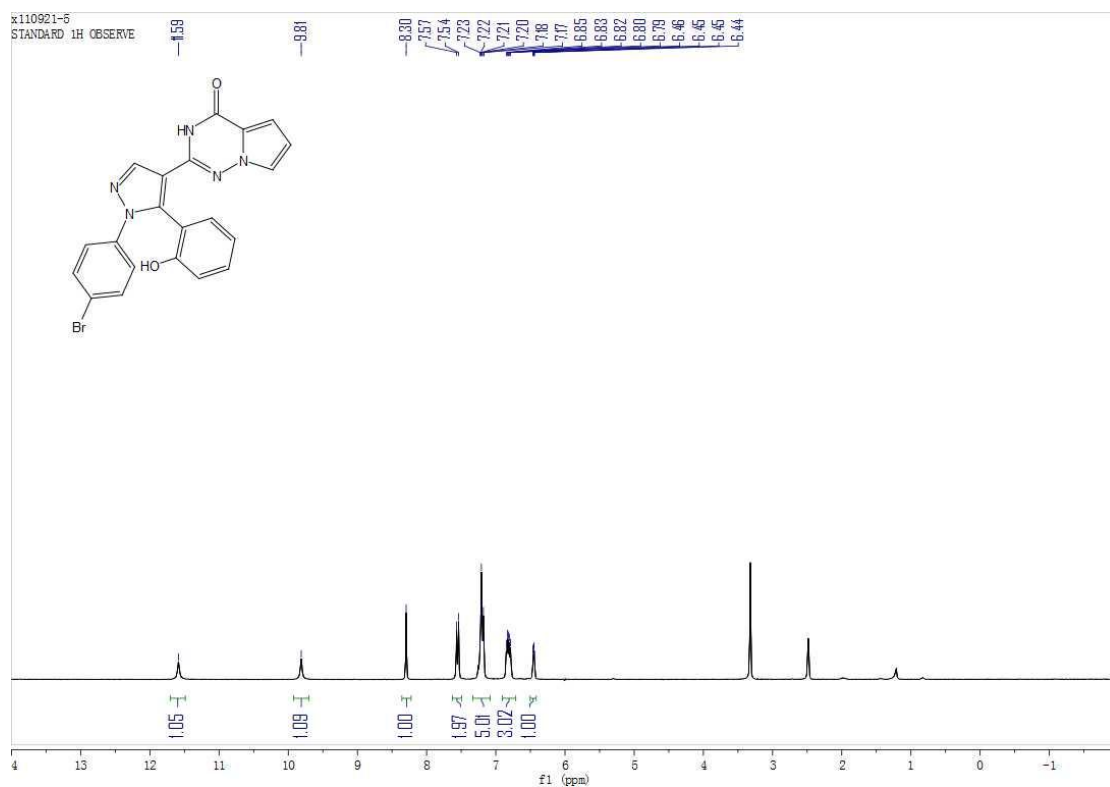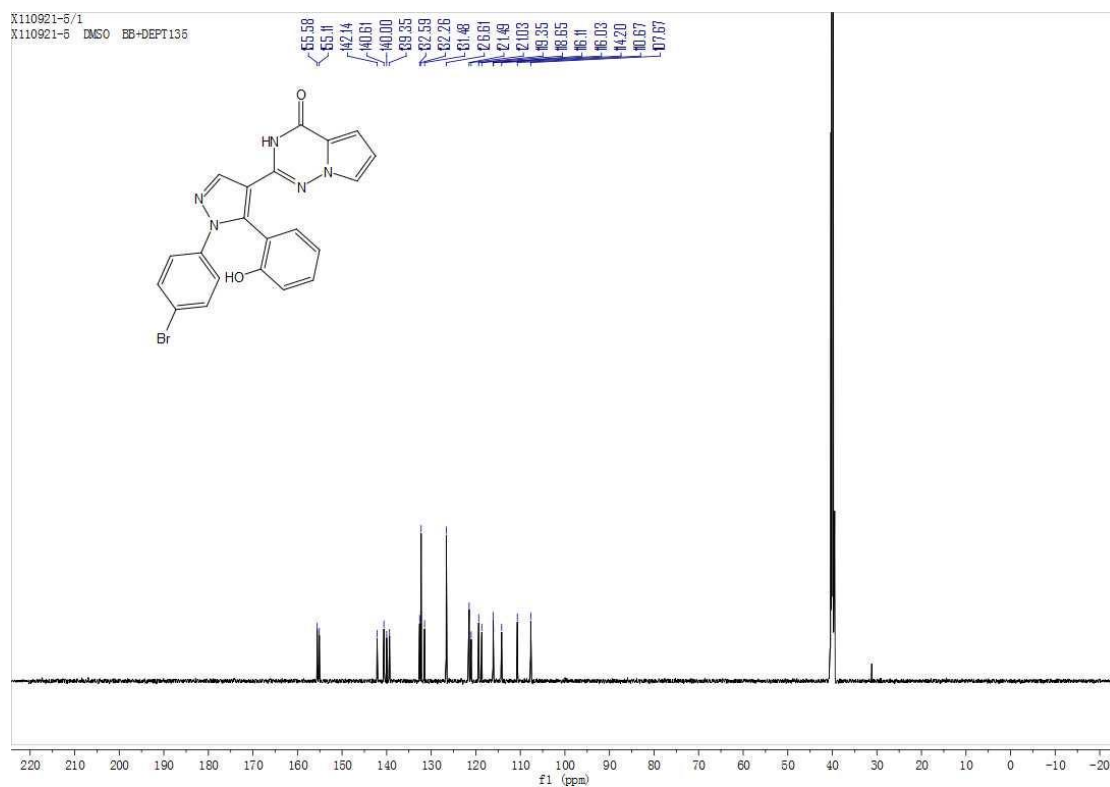

D23

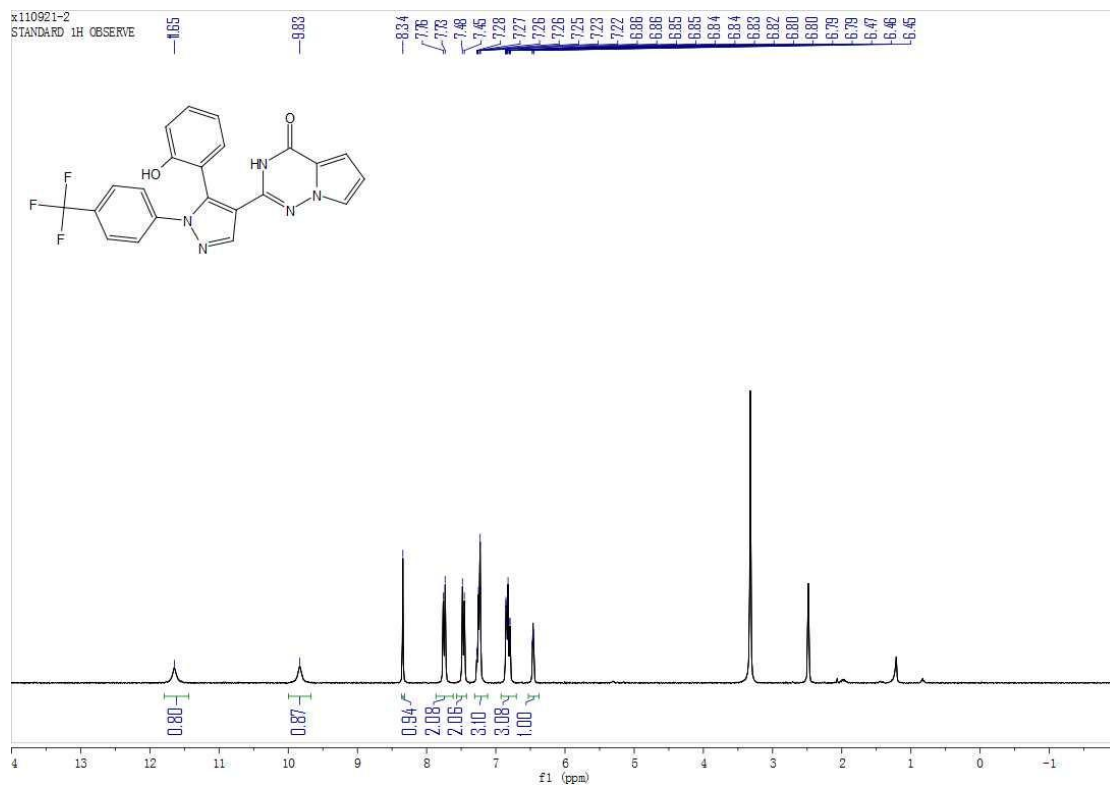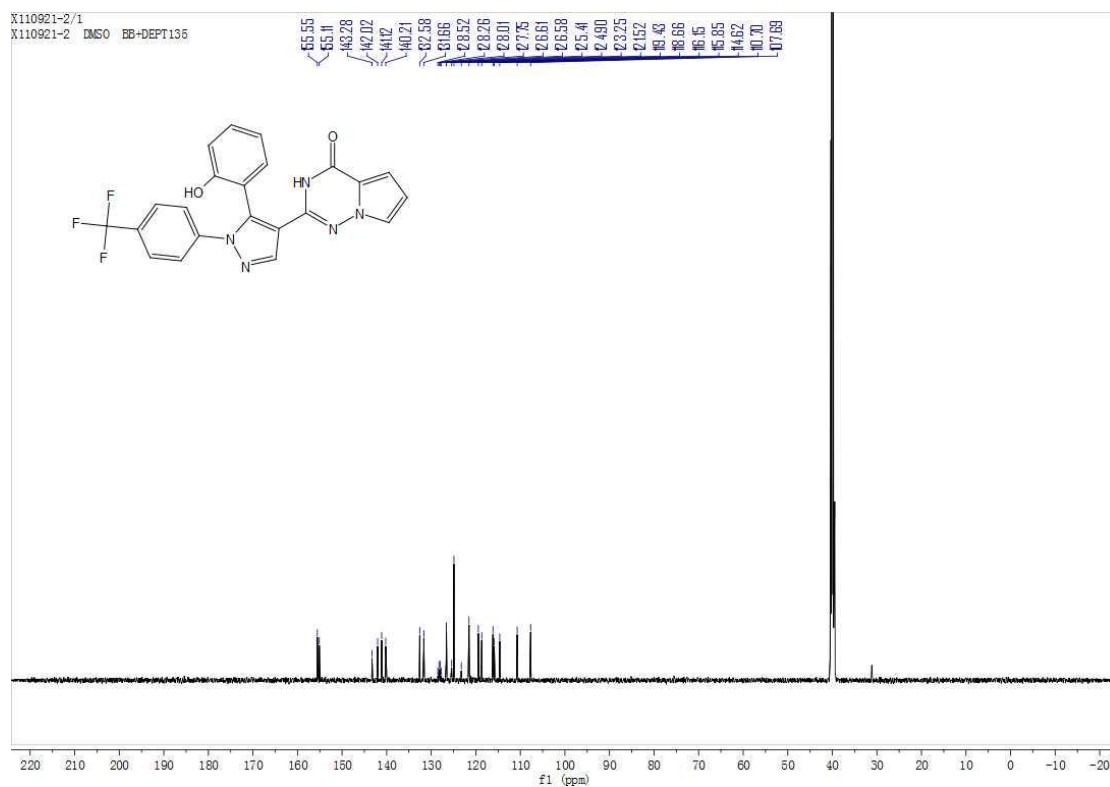

D24

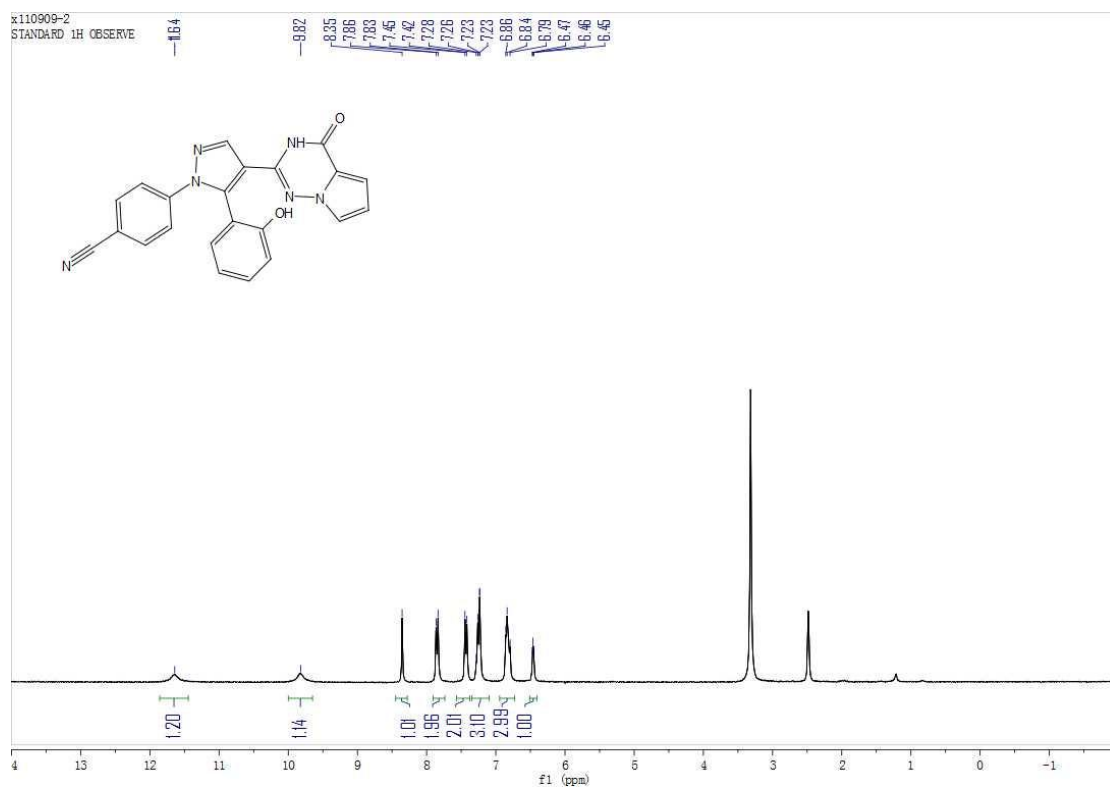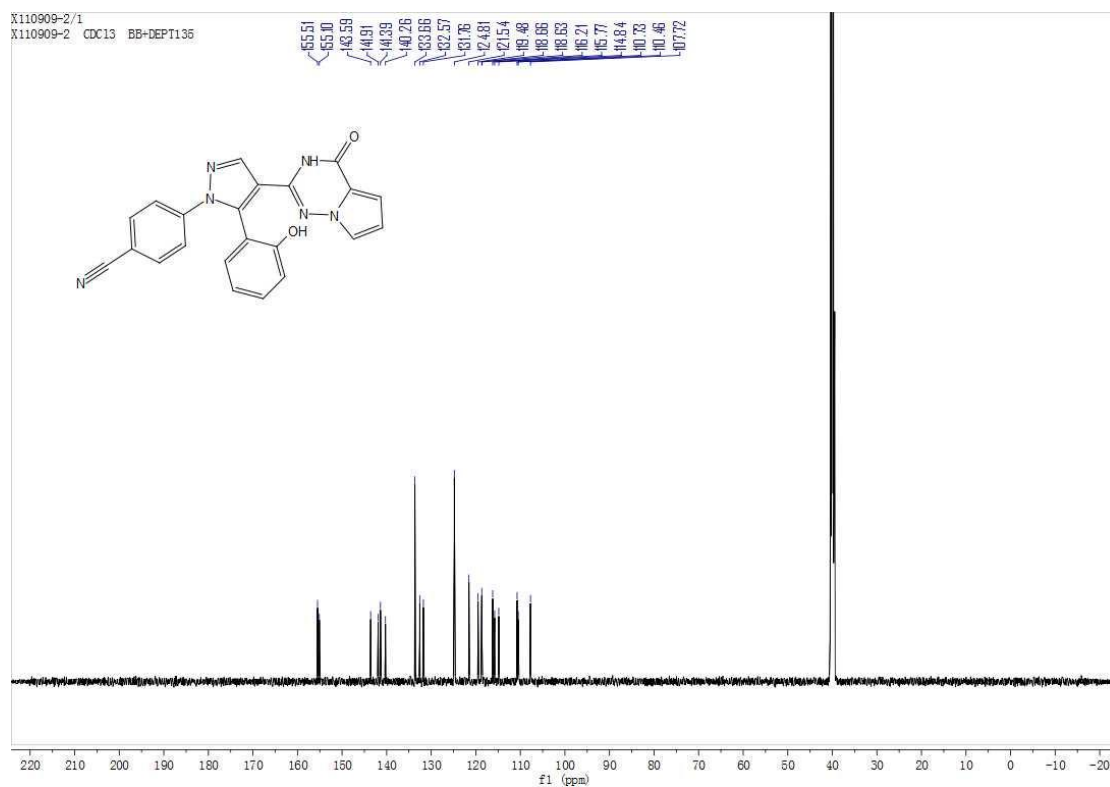

D25

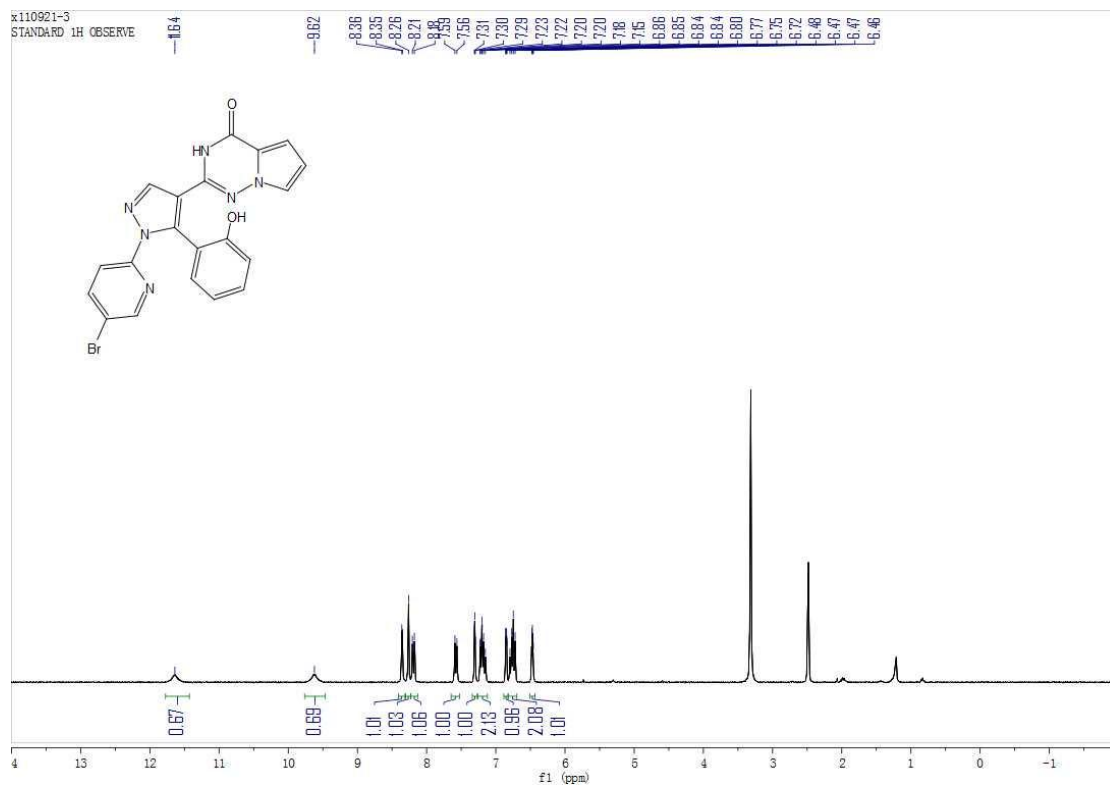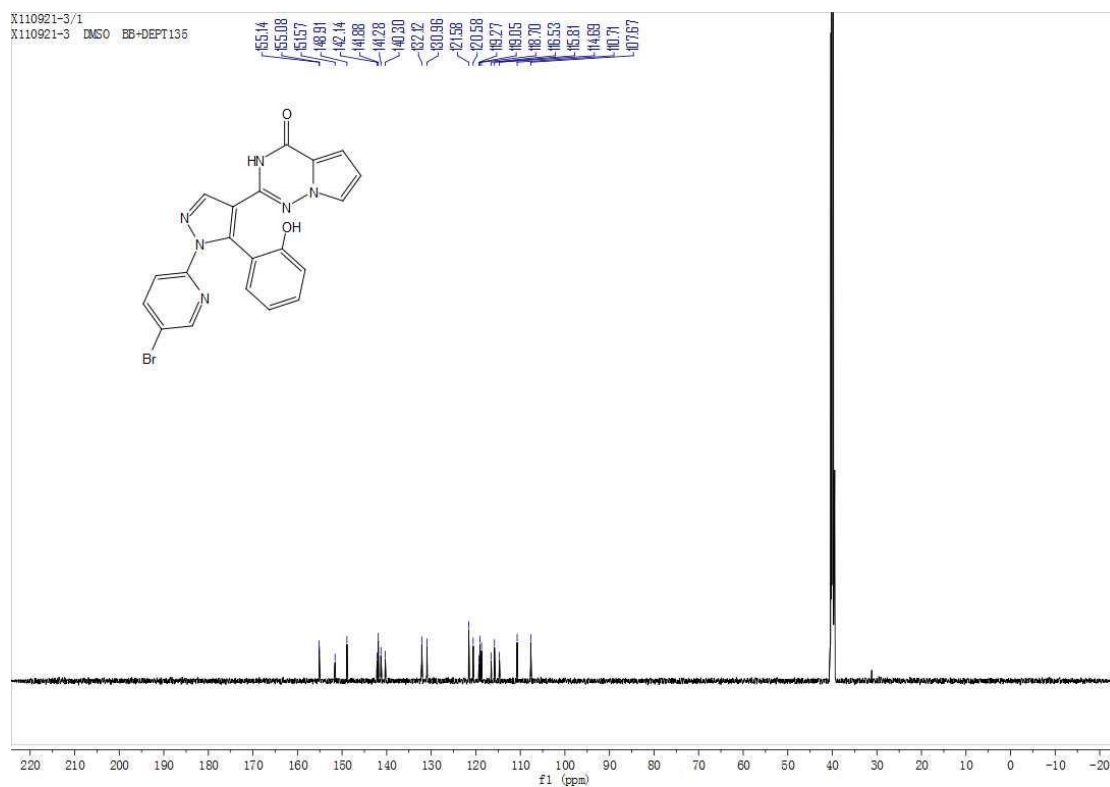

D26

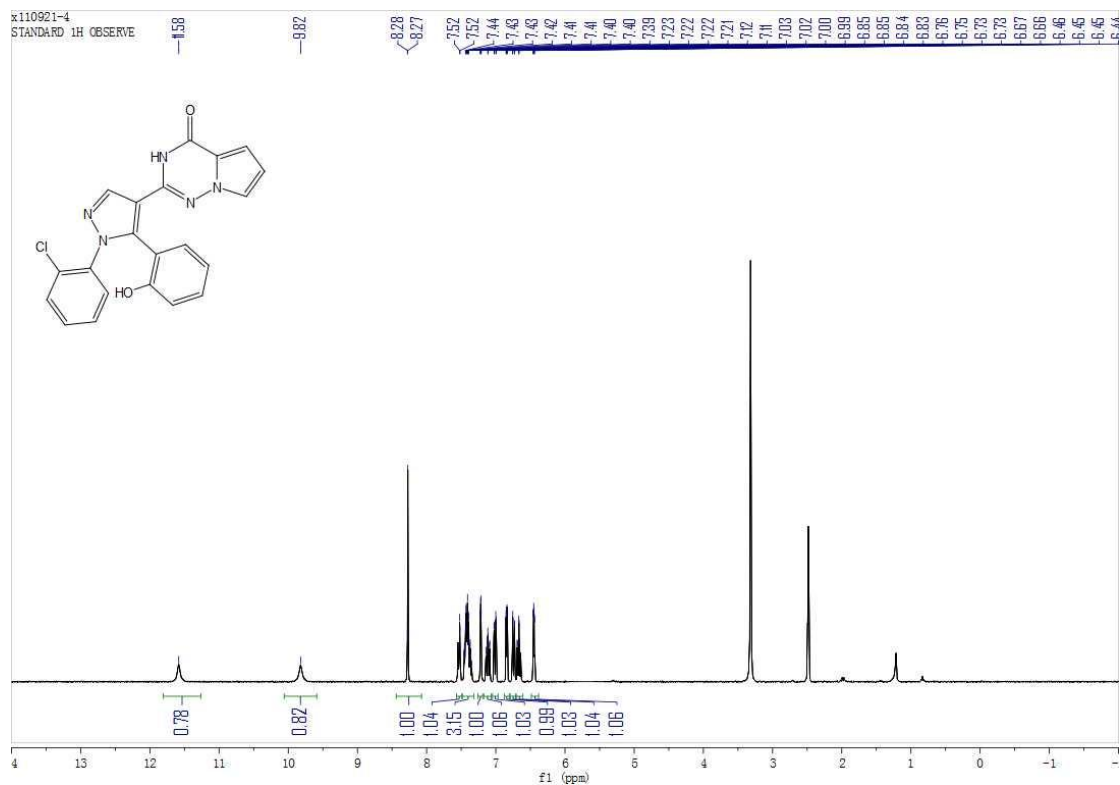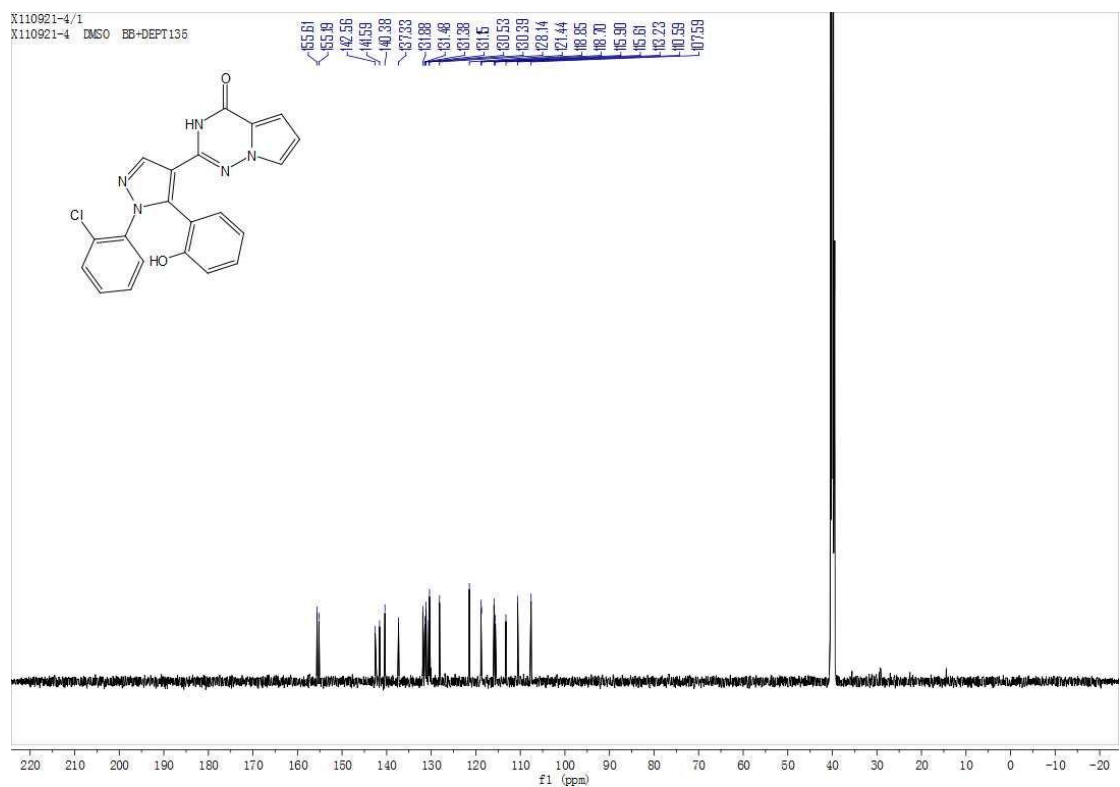

D27

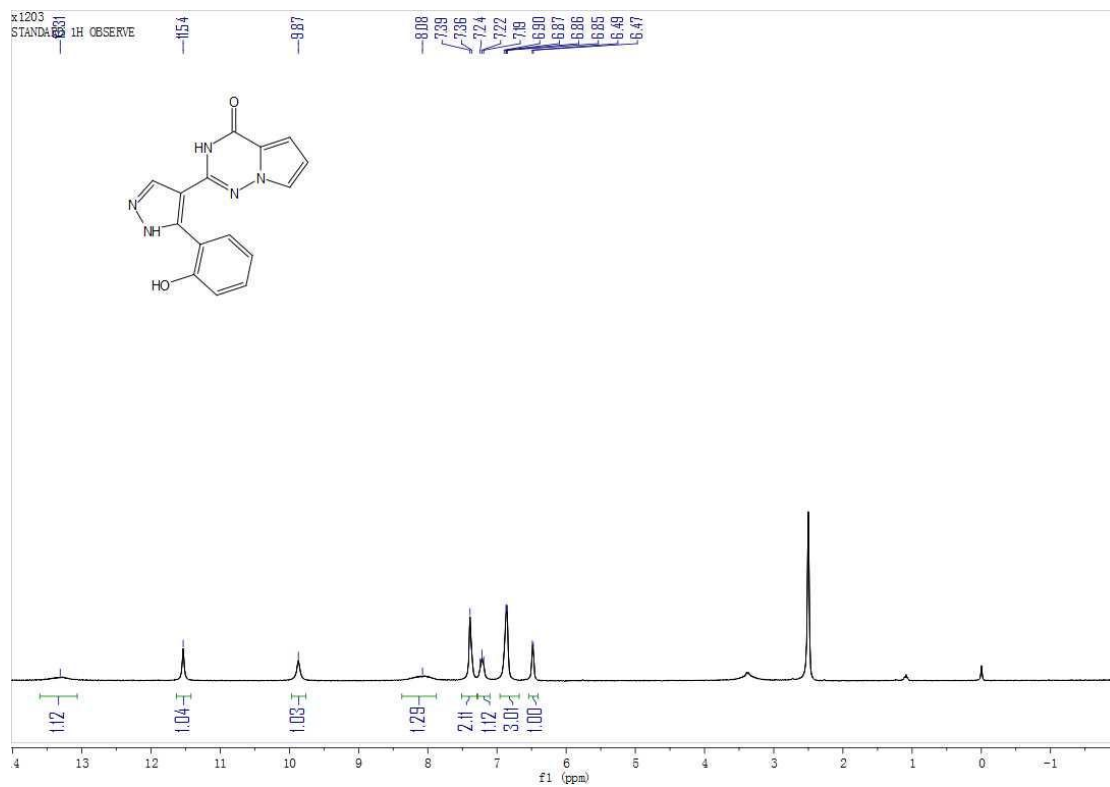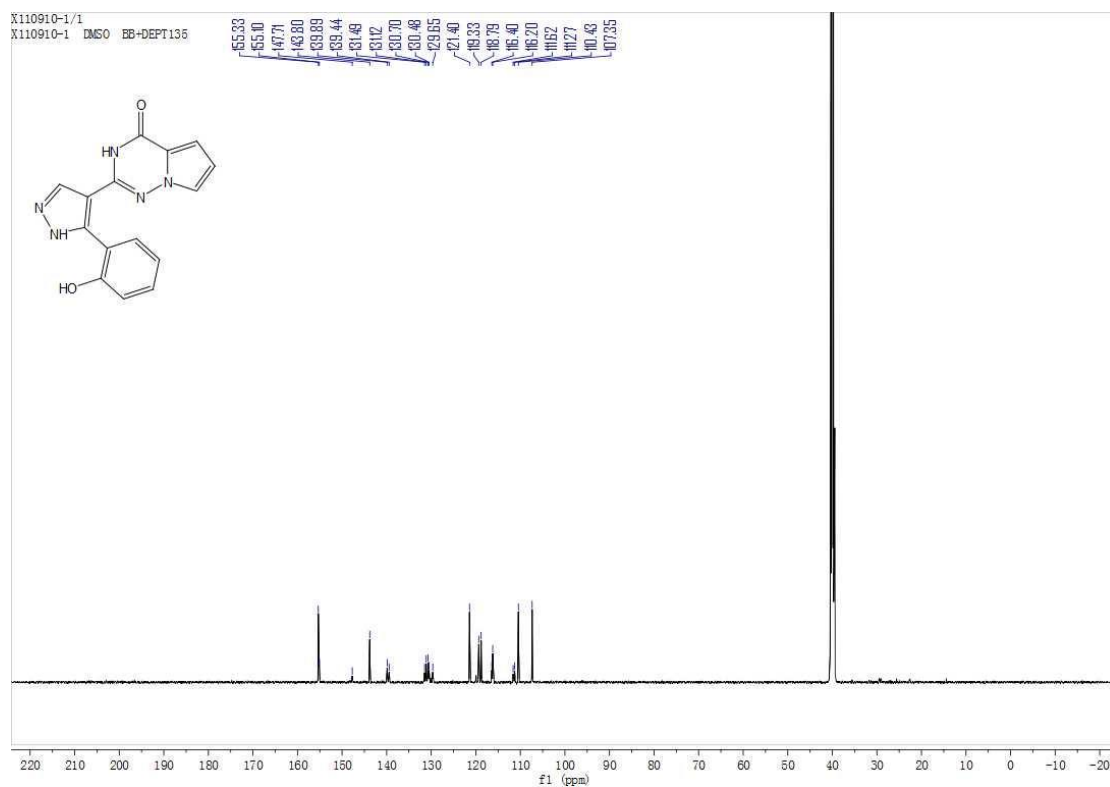

D28



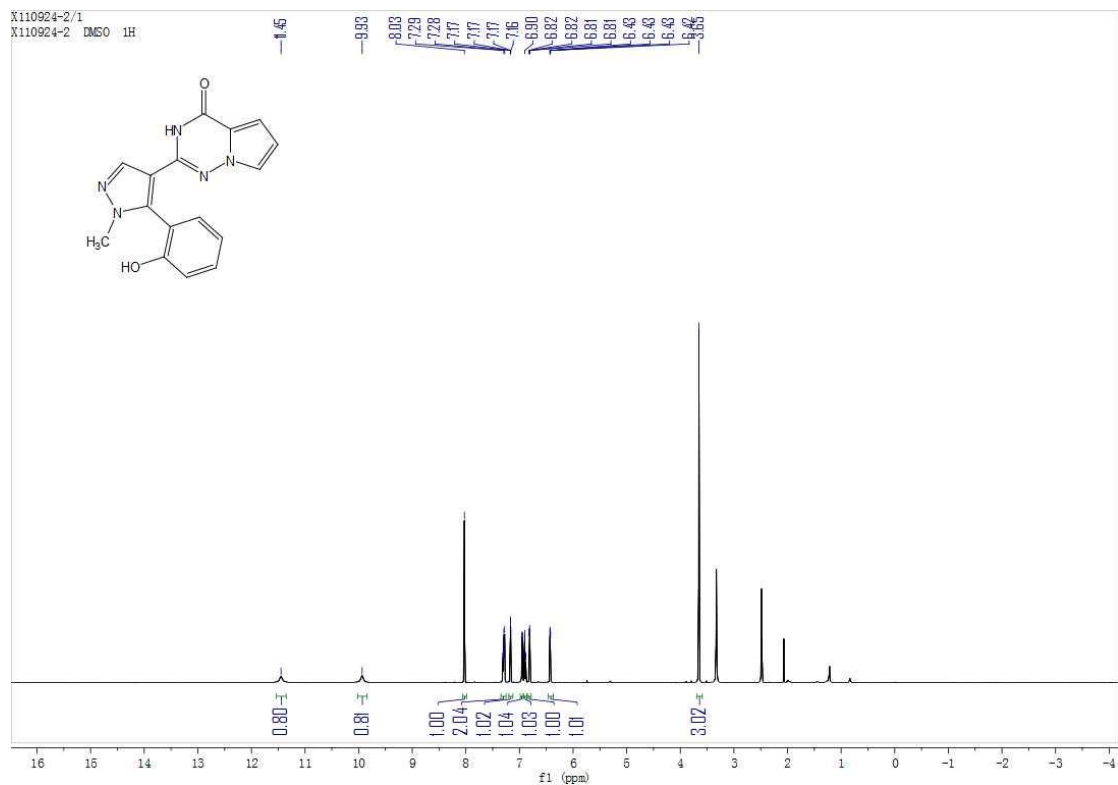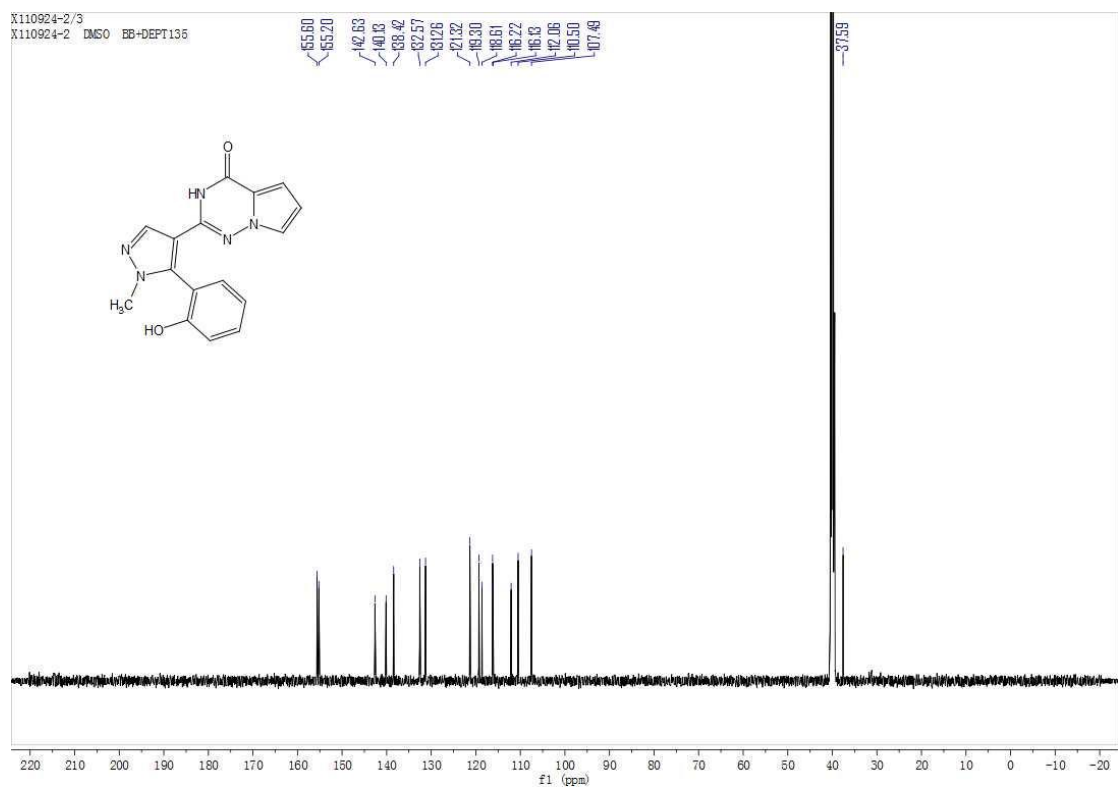

D29

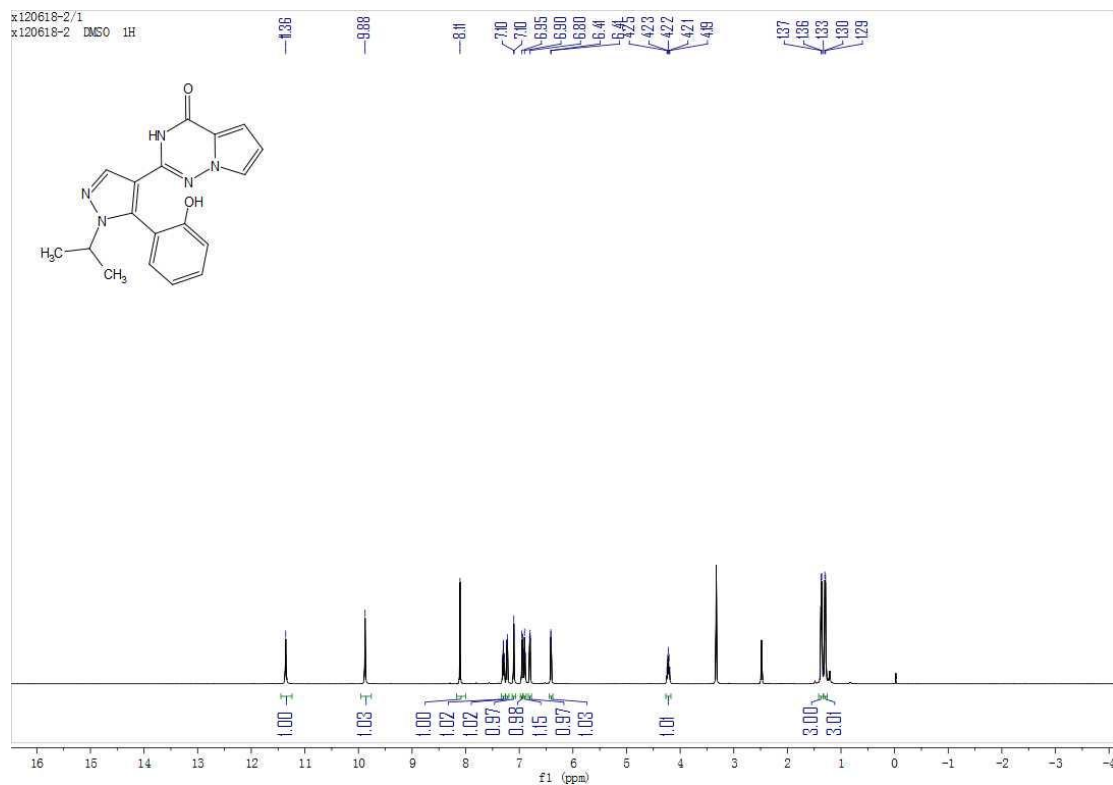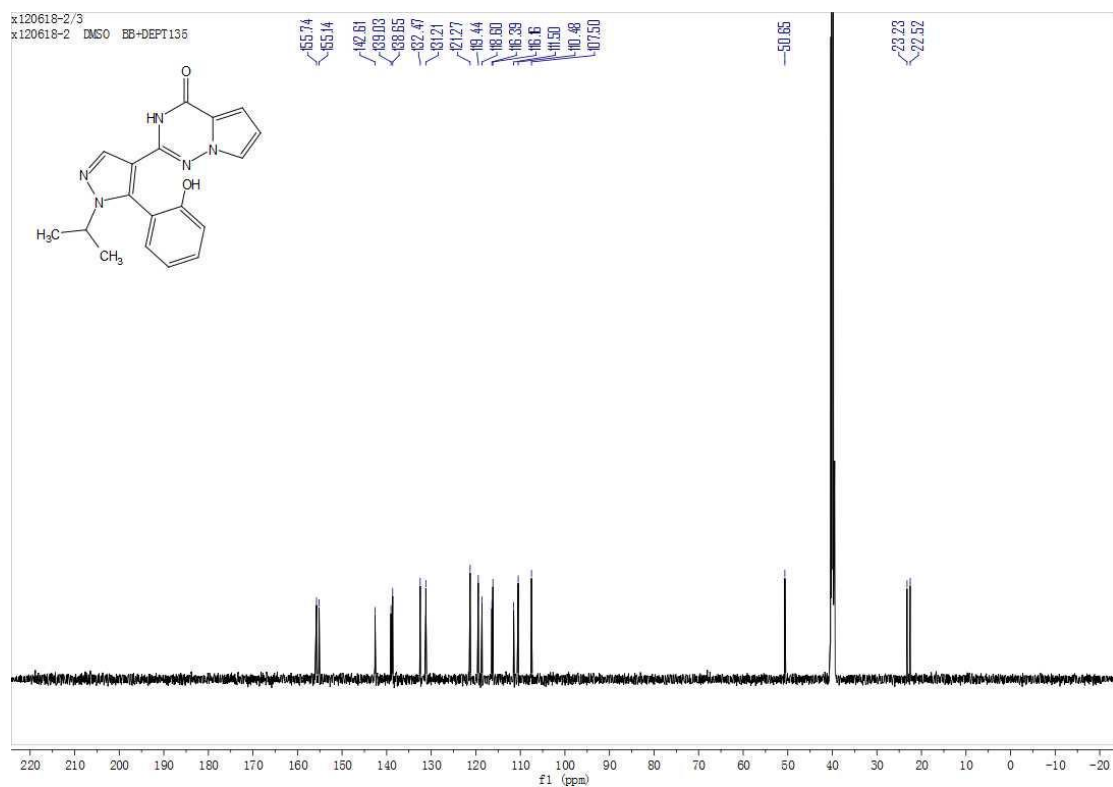

D30

S50

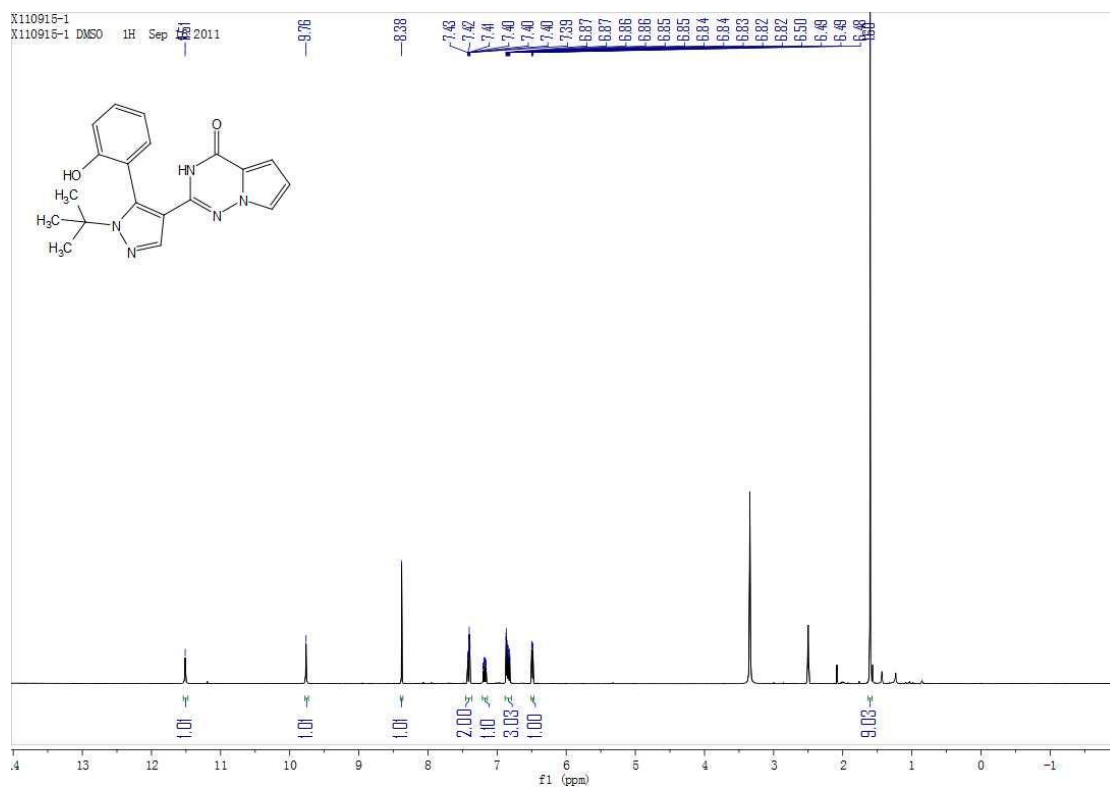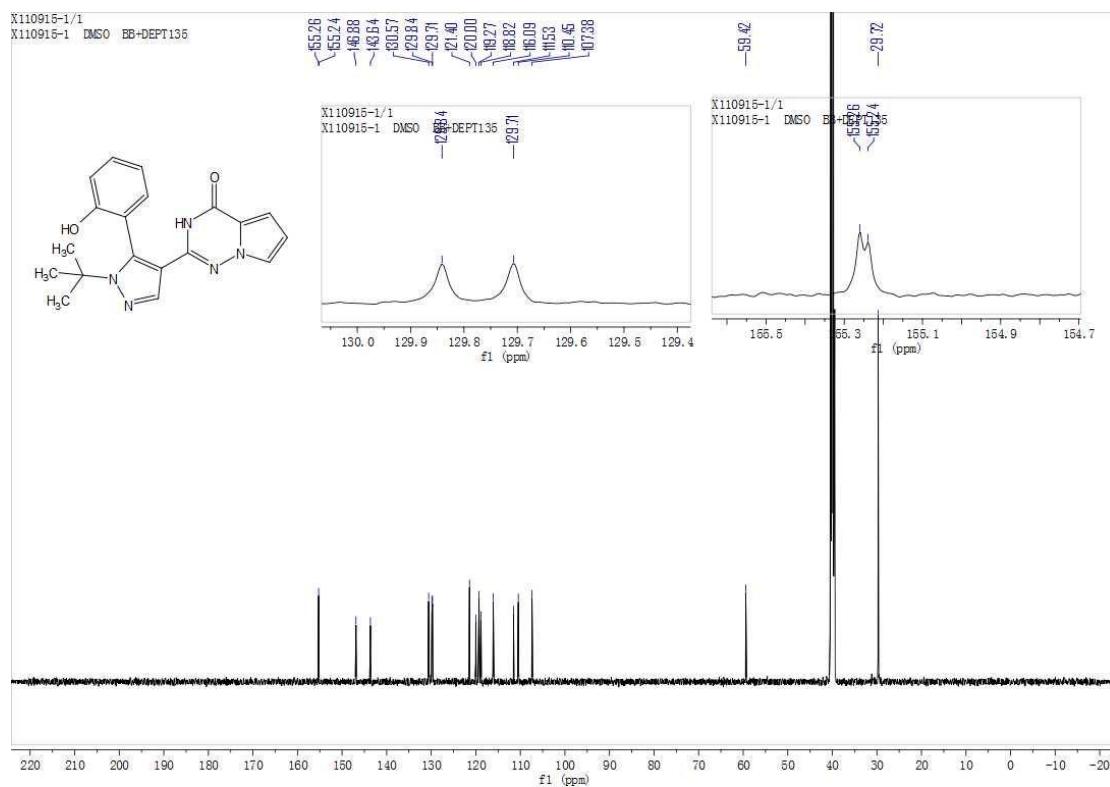

D31

S51

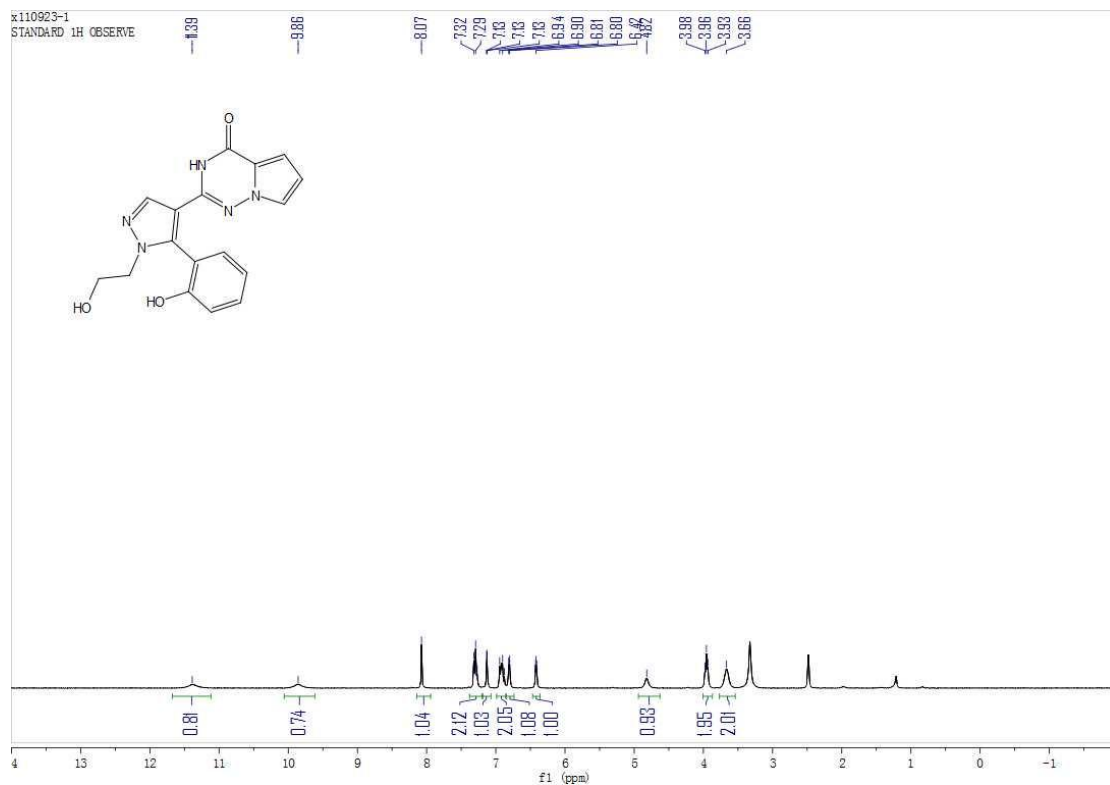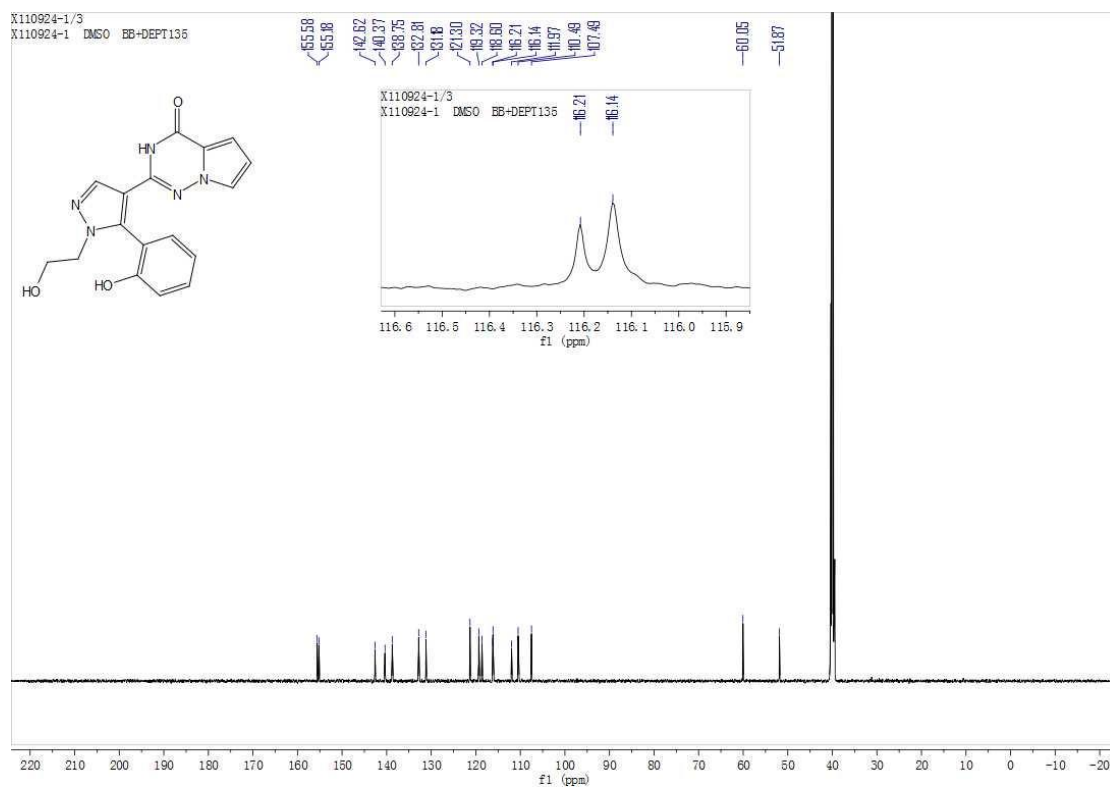

D32

S52

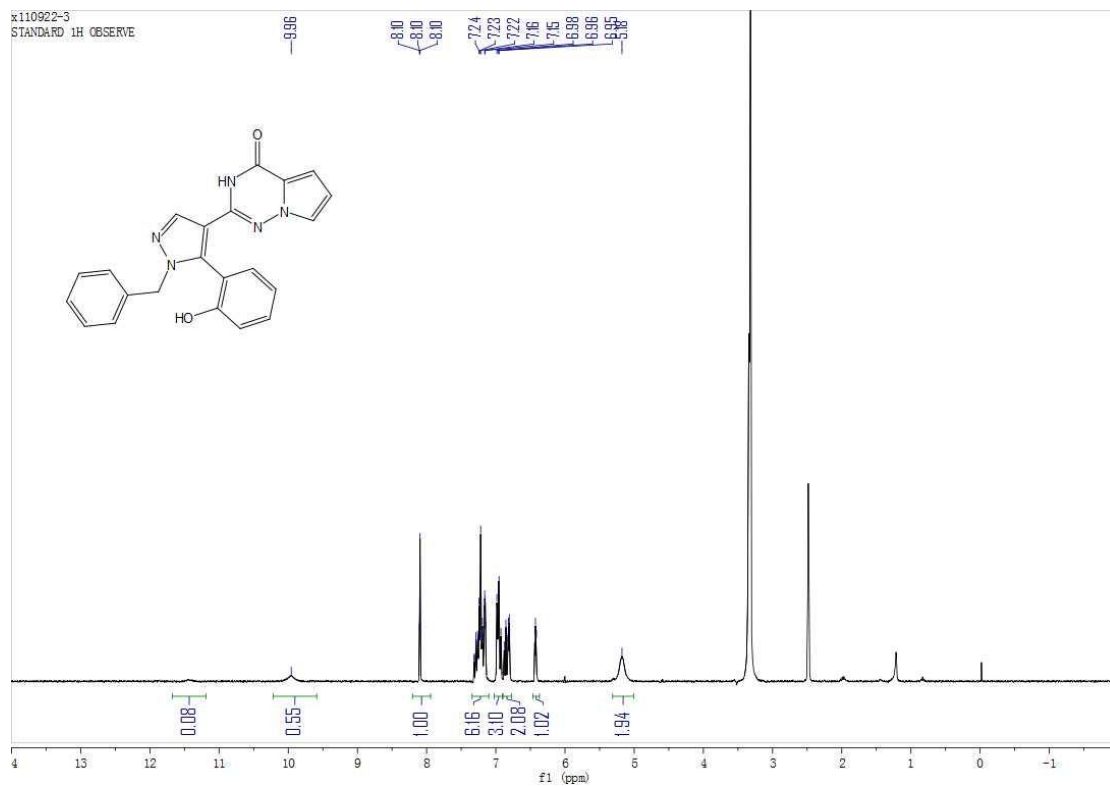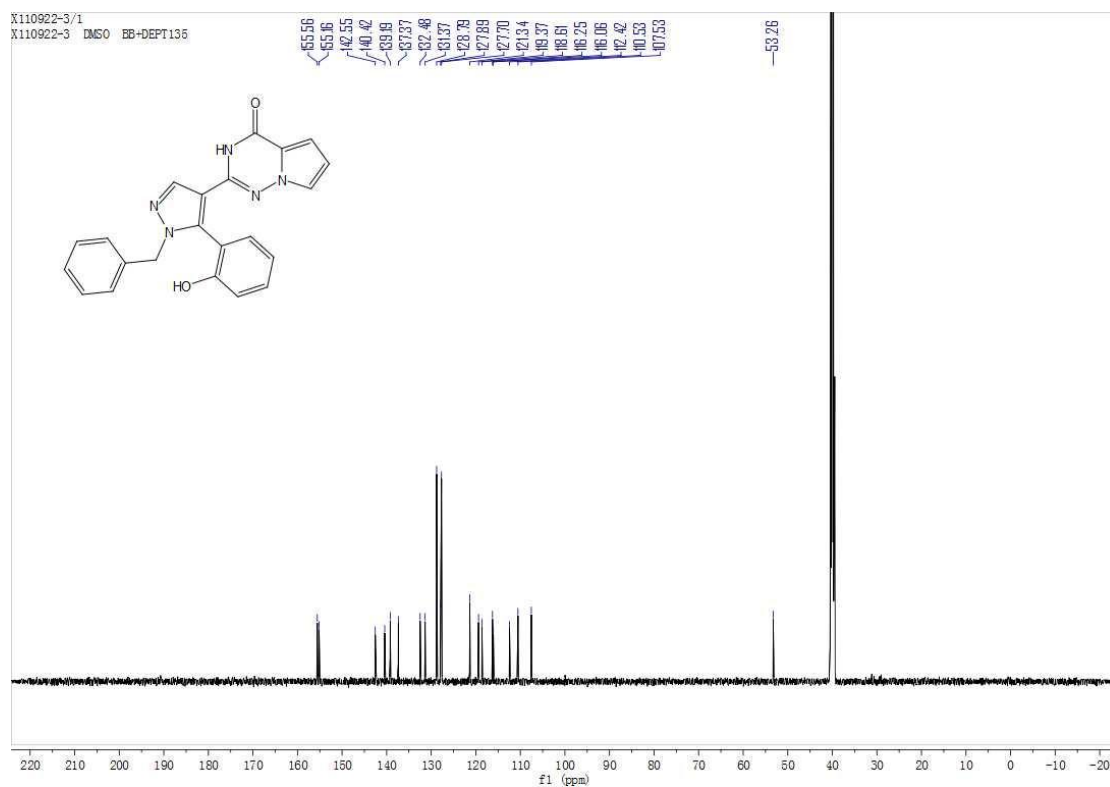

D33

S53

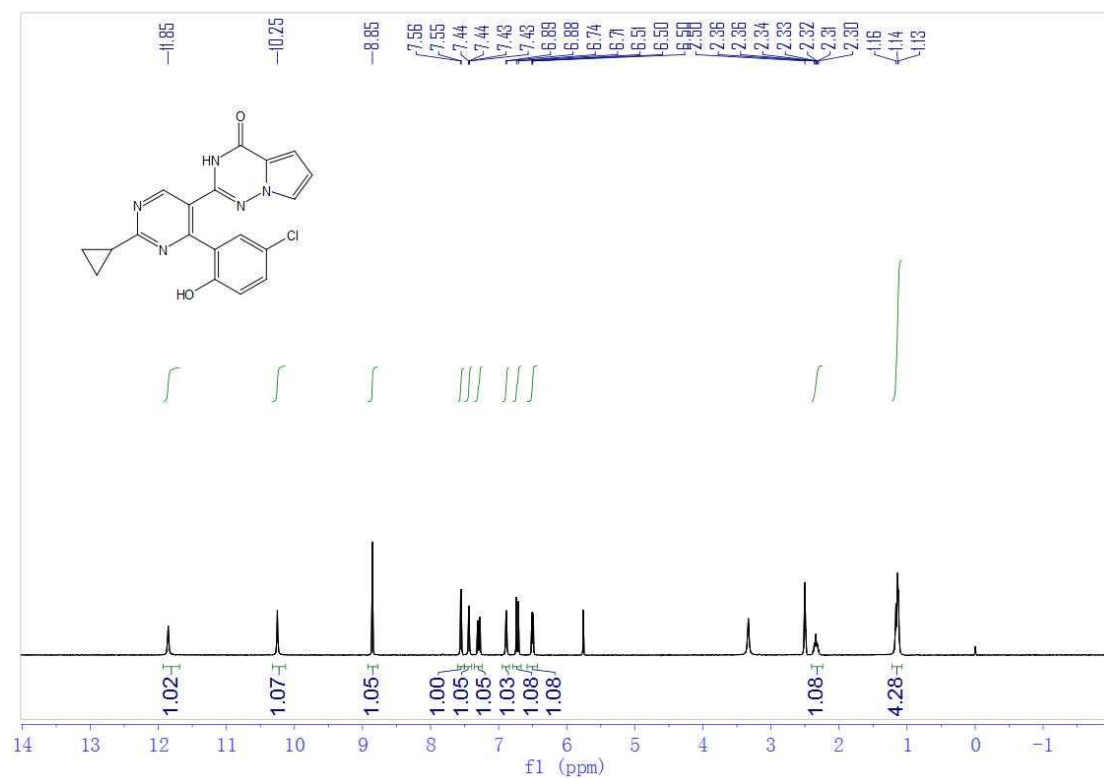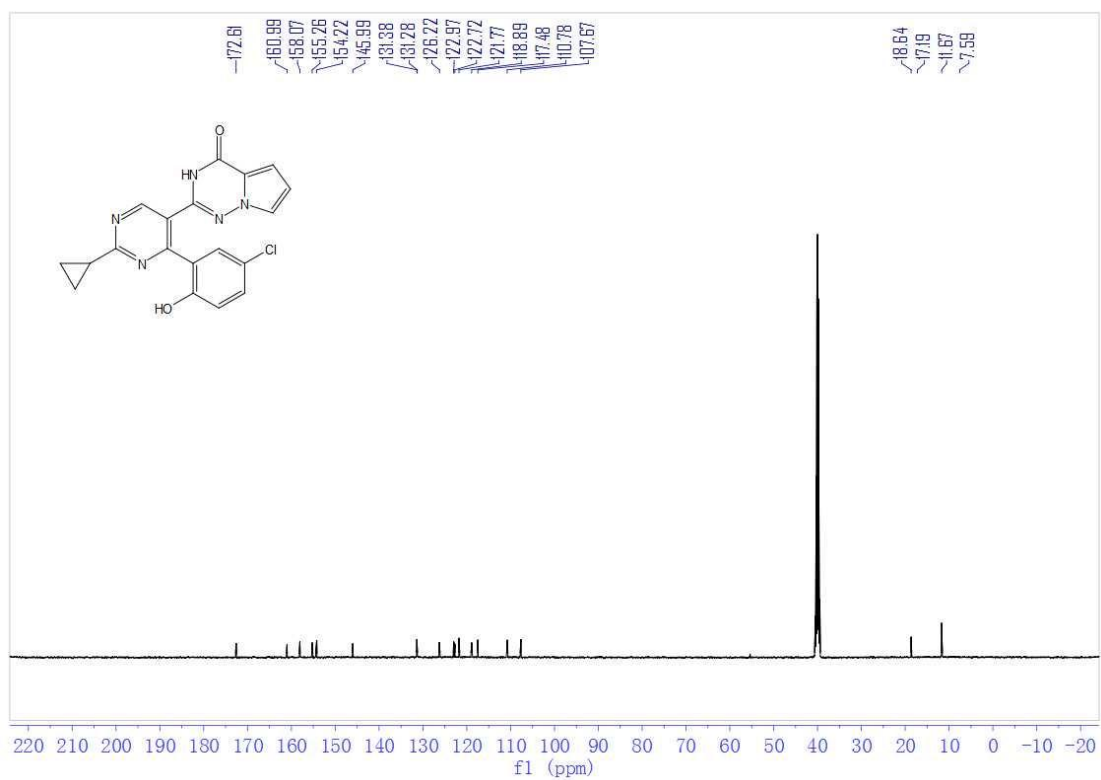

**D34**

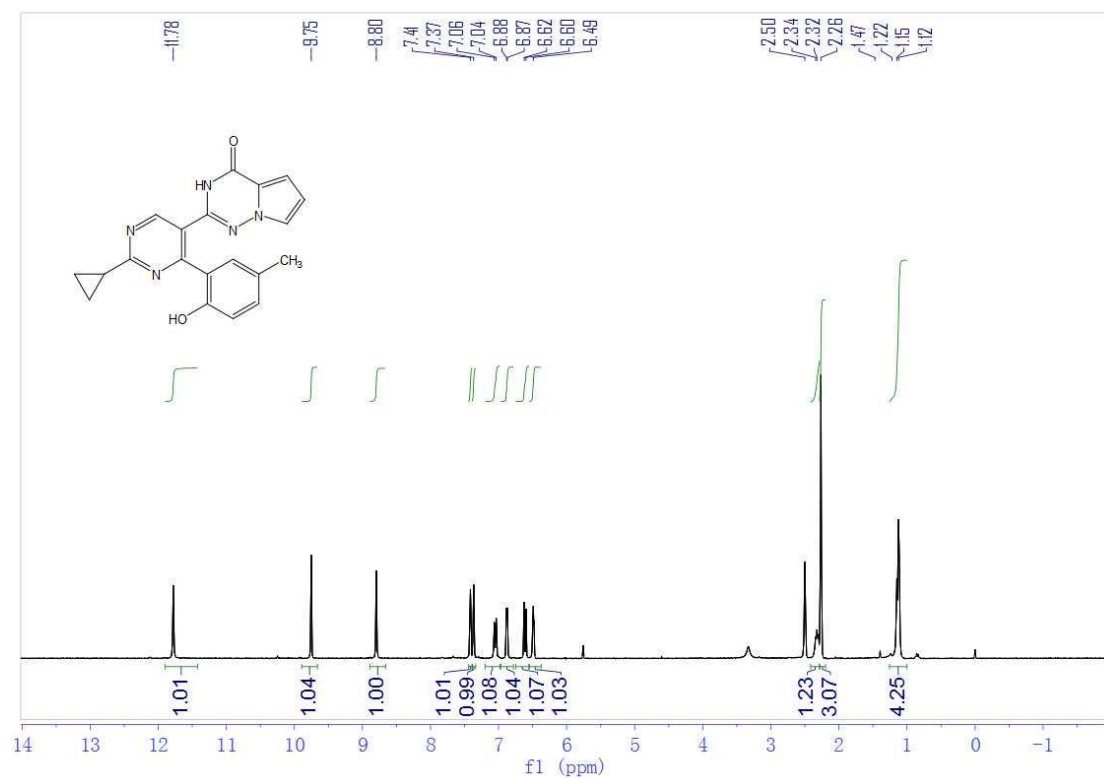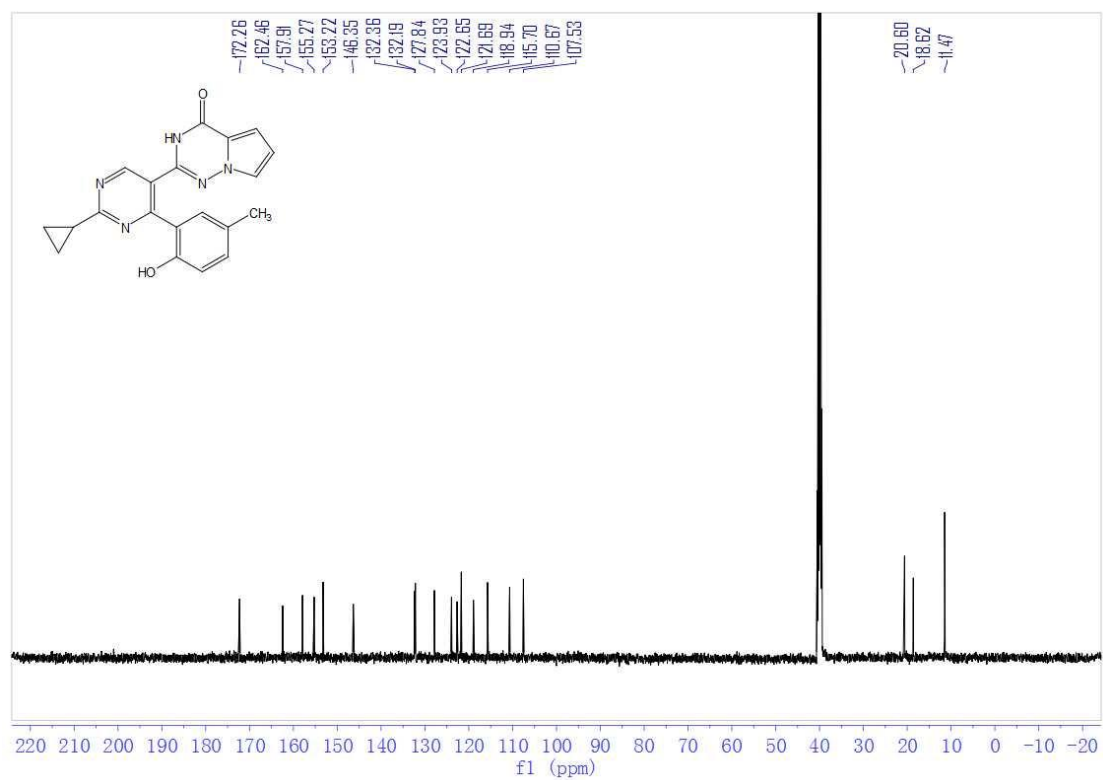

D35

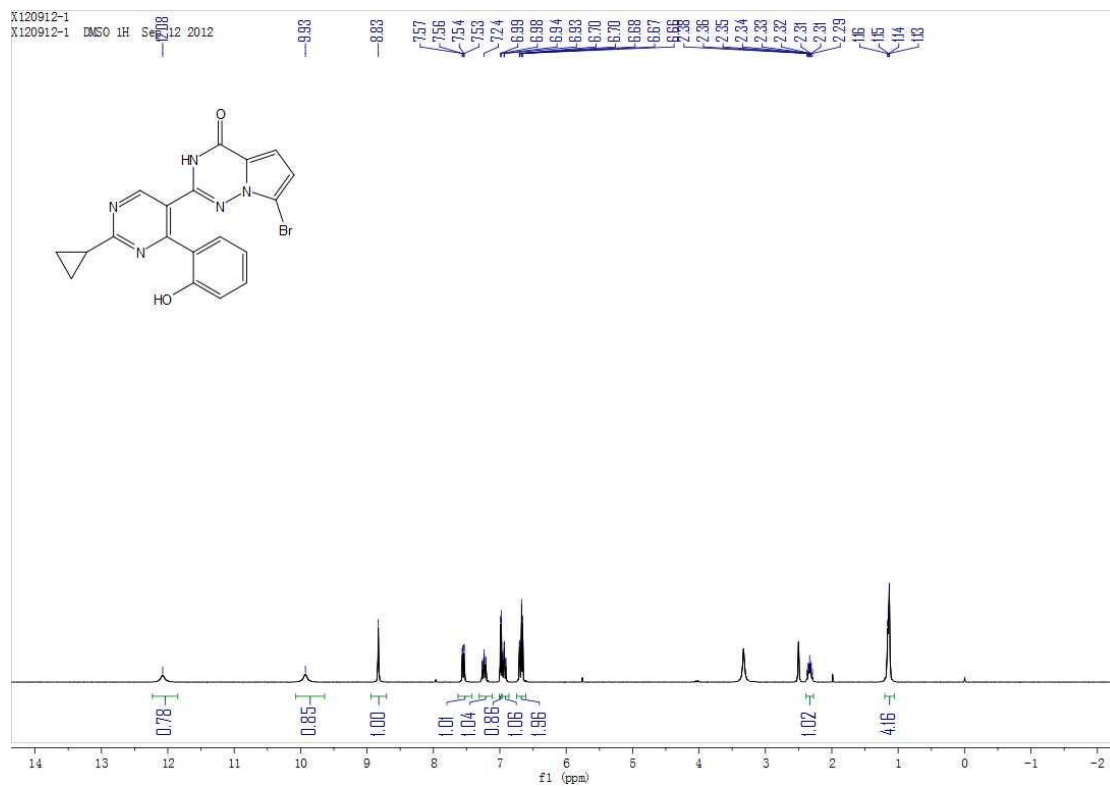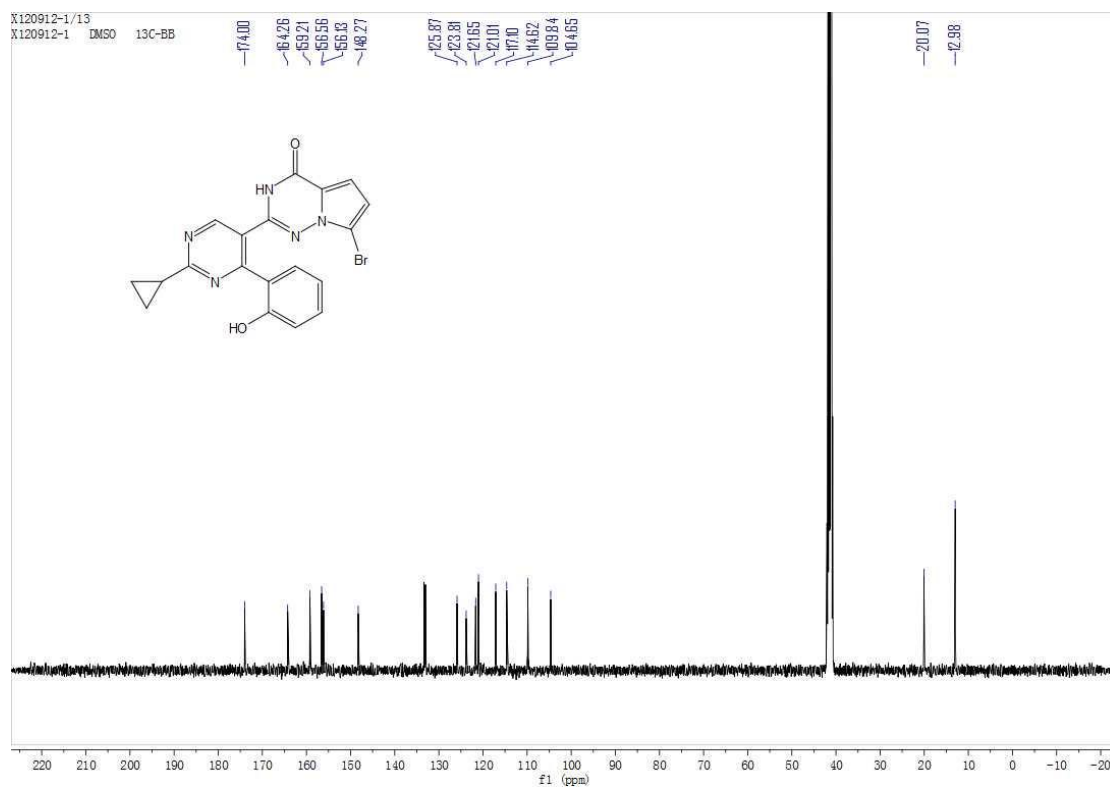

D36



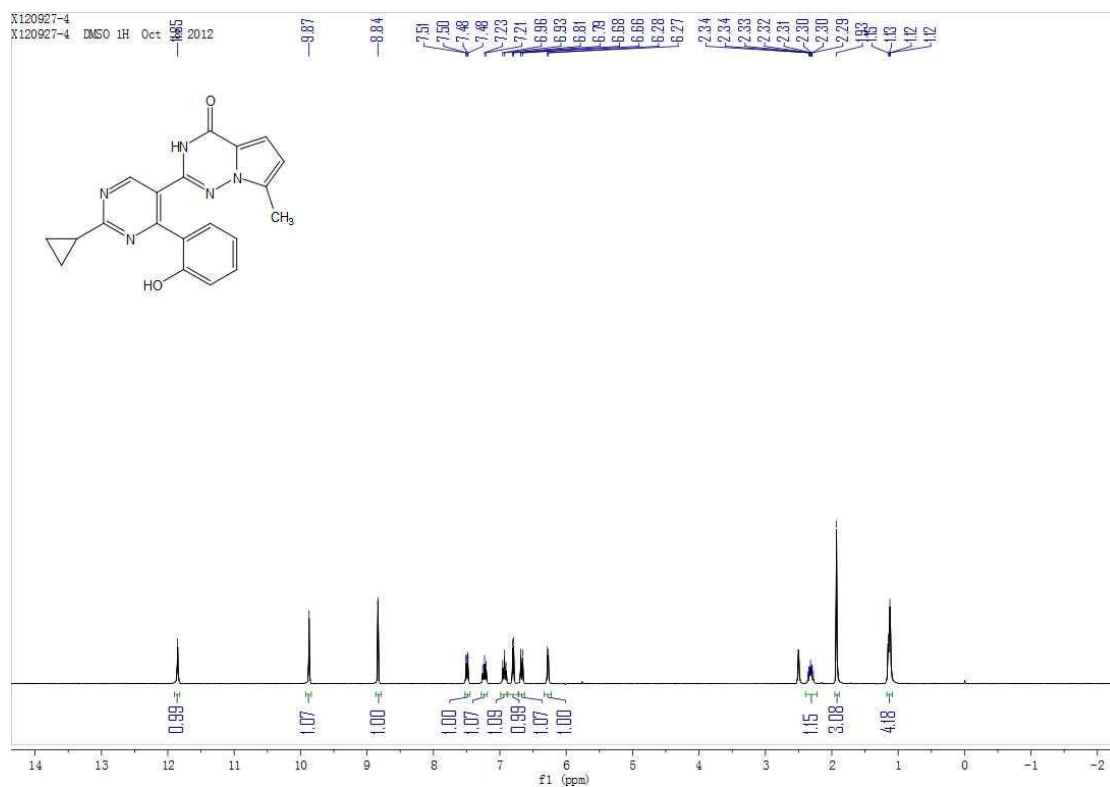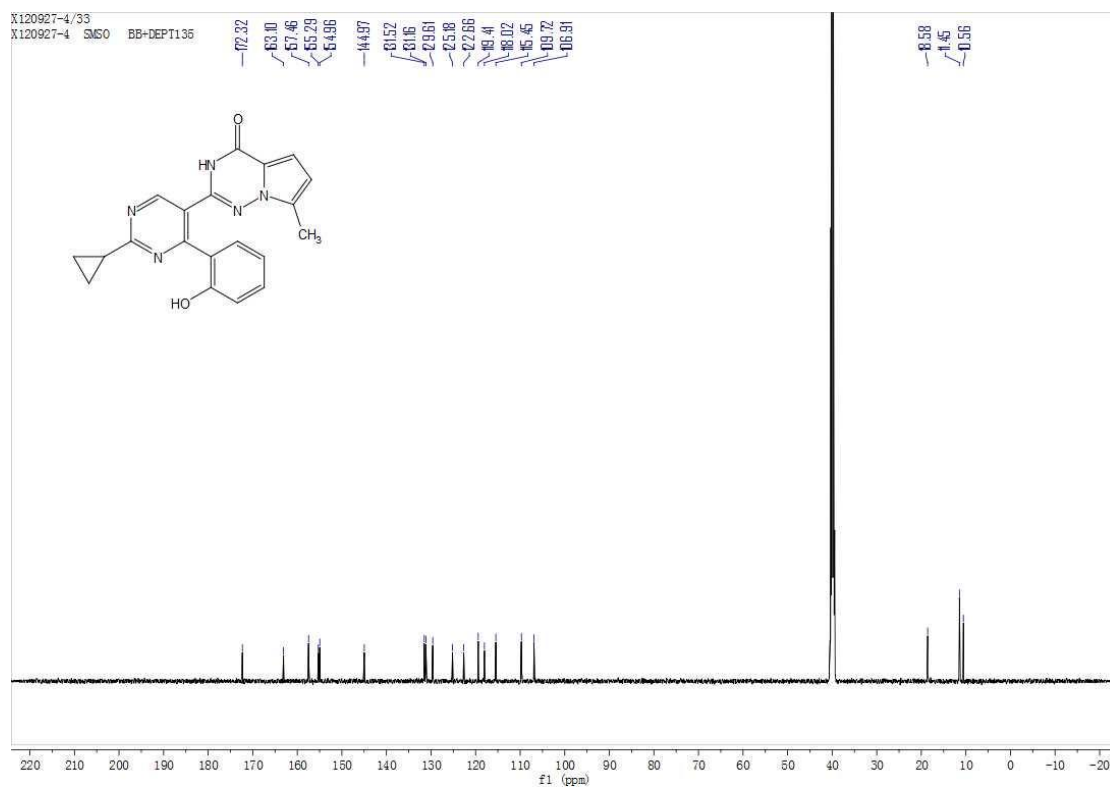

D37

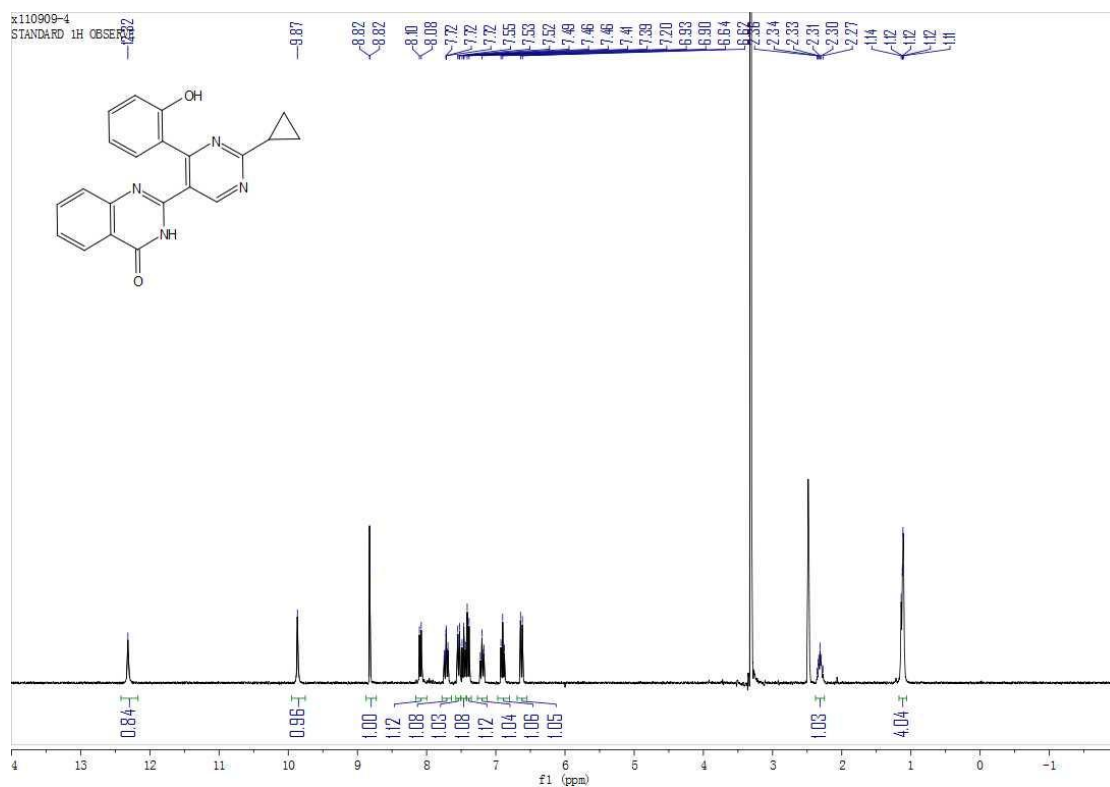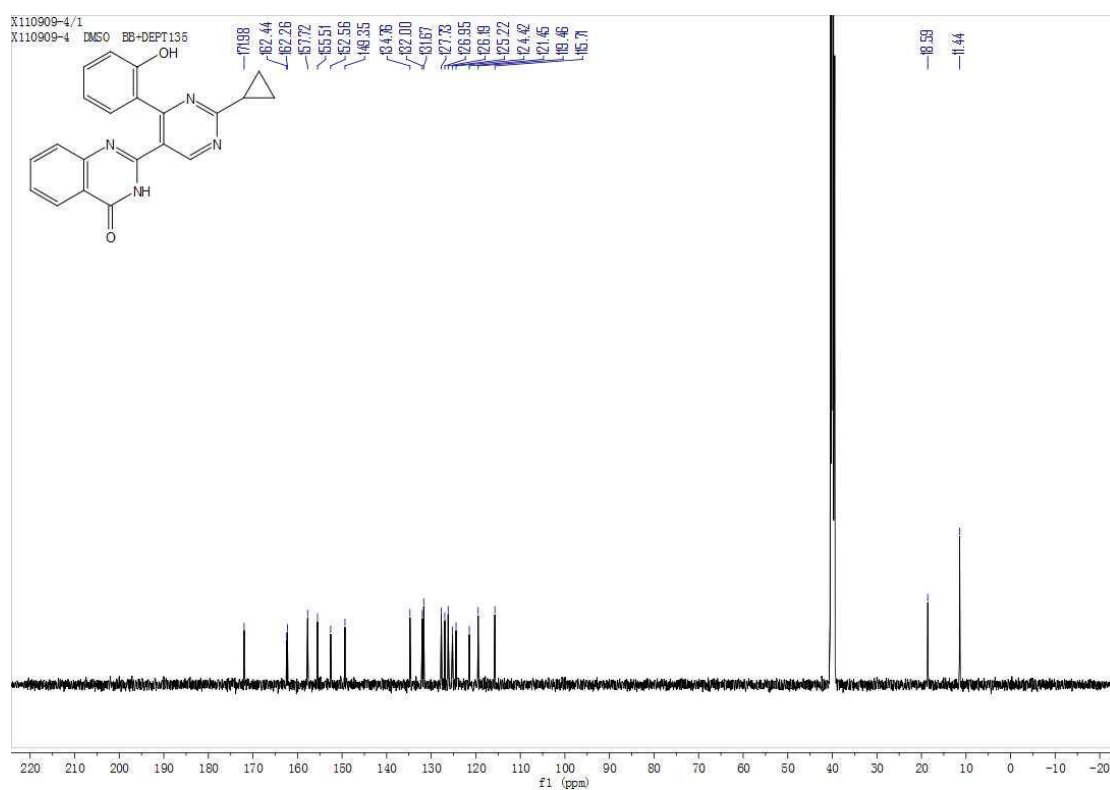

D38

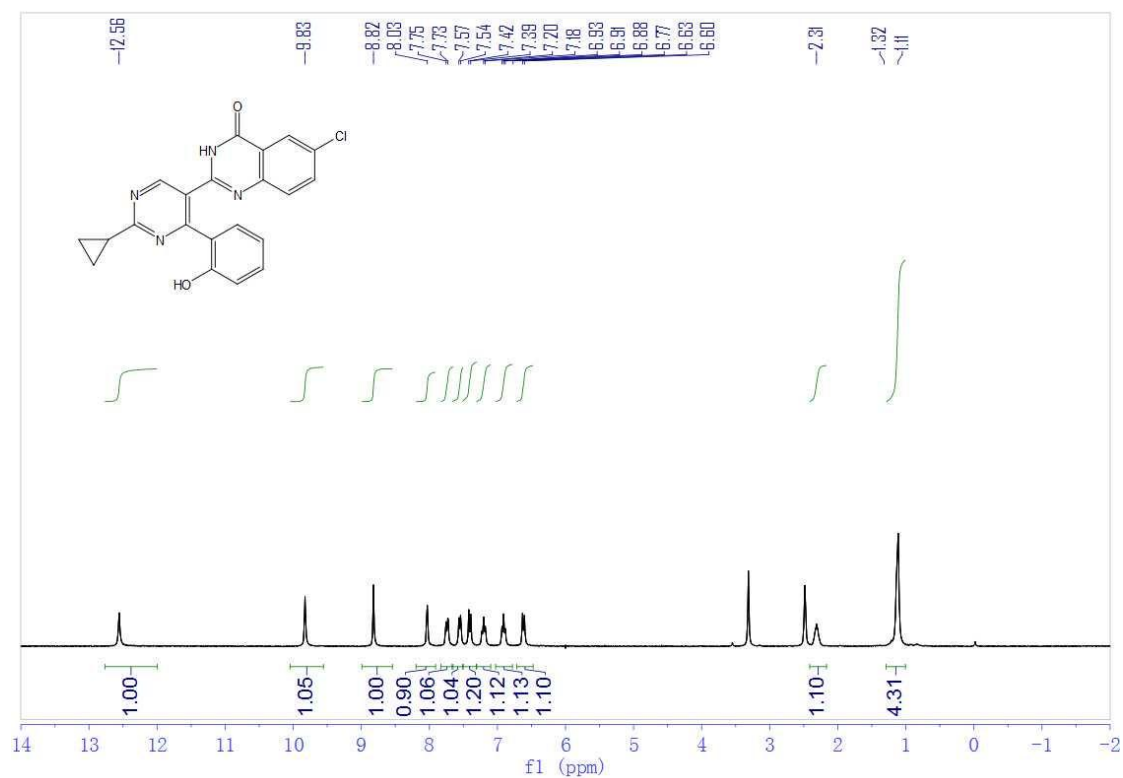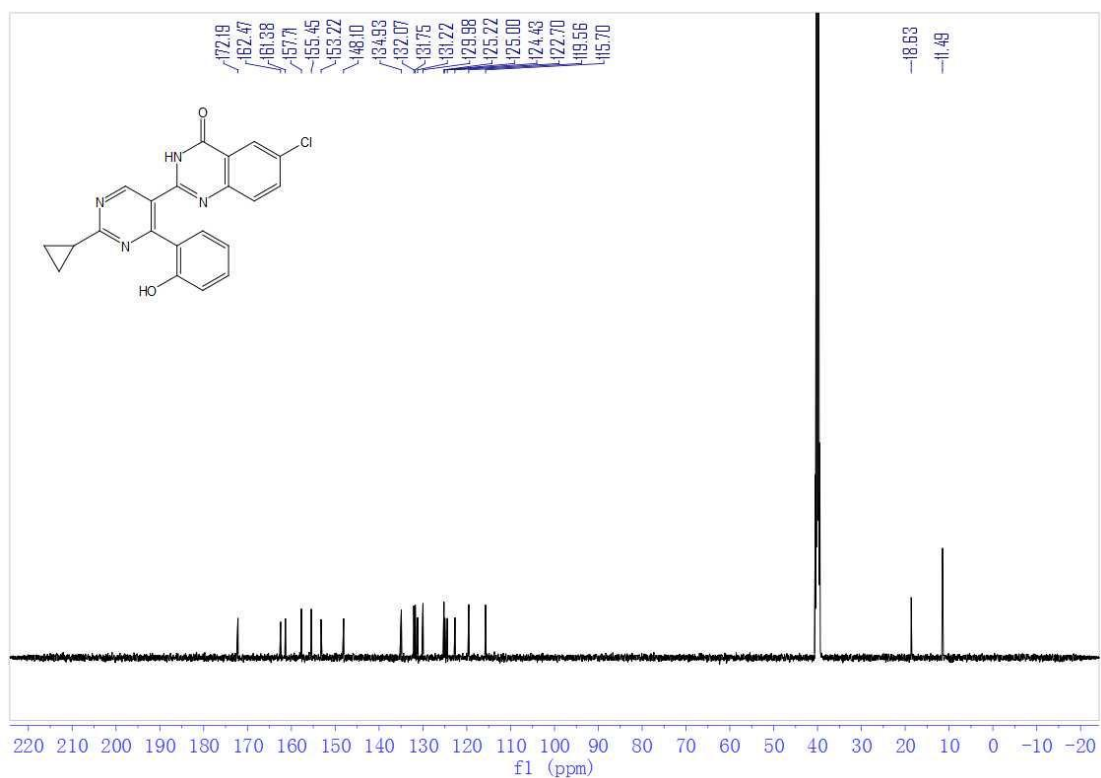

**D39**

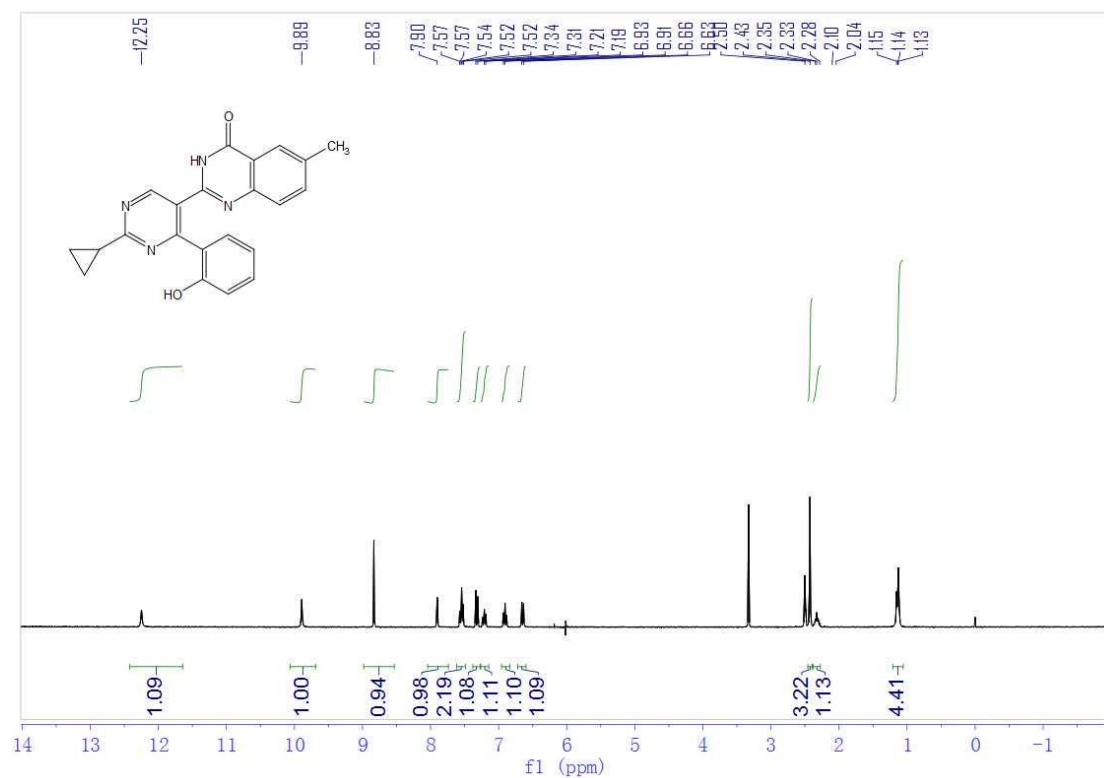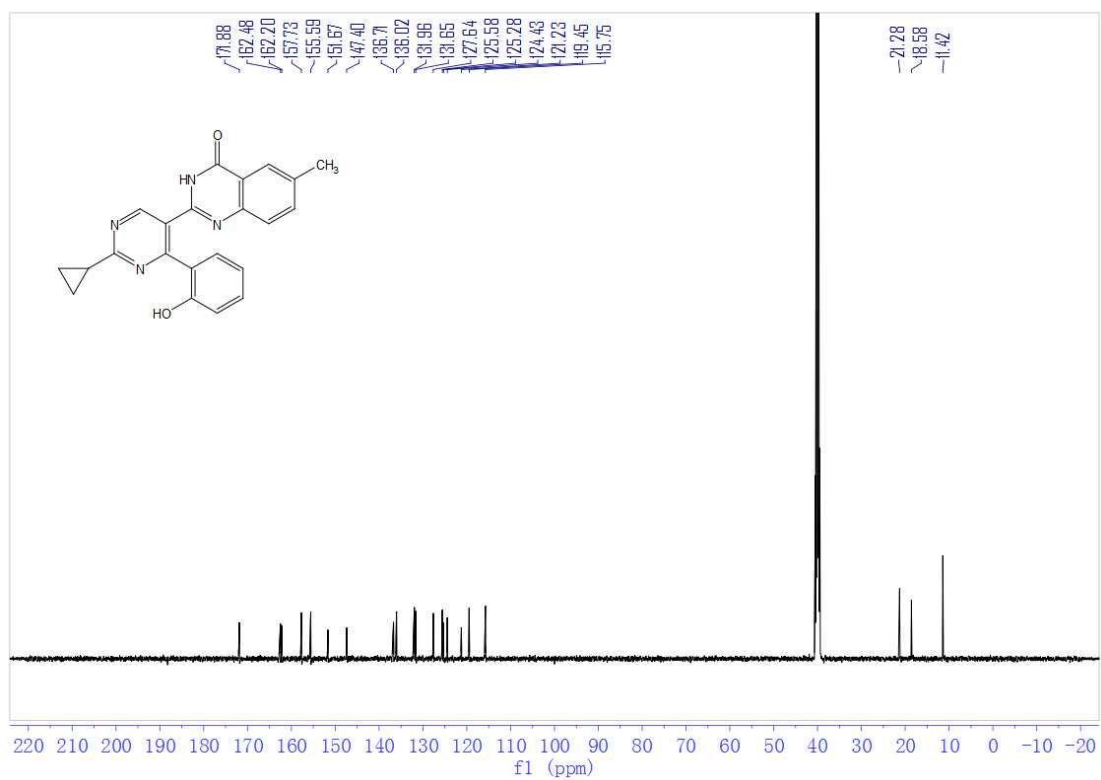

D40
